# Supplementary material for: Two-phase orogen-wide extension of the Himalaya since Miocene
Source: Research Square preprint supplement (doi:10.21203/rs.3.rs-7297266/v1), 2025-09-02
Supplement: Supplementary file 1 [file be9a9da71b0e6f13b470a157.pdf]

# **Supplementary Information for ‘Two-phase orogen-wide extension of the Himalaya since Miocene’**

Rabindra Kumar Patel<sup>1,2</sup>, Vikas Adlakha<sup>1,2\*</sup>, Kunal Mukherjee<sup>1</sup>, Shailendra Pundir<sup>1</sup>, Parikshita Pradhan<sup>1,2</sup>, Ramesh Chandra Patel<sup>3</sup>

<sup>1</sup>Wadia Institute of Himalayan Geology, Dehradun, India

<sup>2</sup>Academy of Scientific and Innovative Research, India

<sup>3</sup>Department of Geology, Institute of Science, Banaras Hindu University, Varanasi, India

e-mail: [vikas.himg@gmail.com](mailto:vikas.himg@gmail.com)

## **Contents**

- 1. Swath Profiles**
- 2. Thermo-kinematic Modeling**
  - 2.1 Forward Modeling**
  - 2.2 Inverse Modeling**
  - 2.3 Modeling Discussion**
    - 2.3.1 Gianbul Dome**
      - 2.3.1.1 Field Evidence**
      - 2.3.1.2 Ksn for Gianbul Dome**
    - 2.3.2 Suru Dome**
    - 2.3.3 Chisoti Dome**
    - 2.3.4 Changgo-Malashan Dome**
    - 2.3.5 Mabja Dome**
    - 2.3.6 Kampa Dome**

### 2.3.7 Kangmar Dome

## 3. Normalized Channel Steepness Index (Ksn)

## 4. Gravity Disturbance

### 1. Swath Profiles

To analyze the relationship between topography, precipitation with faults in gneissic domes (See Fig. 1), we plotted swath profiles spanning over ~400 km, extending from the Main Himalayan Thrust (MHT) to the Indus Tsangpo Suture Zone (ITSZ) (see Fig. S1). In this study, swath profiles are extracted from SRTM 30m DEM using ArcGIS add-on software (Periz-Pena et al., 2017), with a swath width of ~50 km (see Fig. 1). The correlation between elevation, relief, and precipitation, incorporating Tropical Rainfall Measuring Mission (TRMM) annual rainfall data (1998–2009) (see Figure S1) (Bookhagen, 2010), clearly demonstrates that all the gneissic domes are situated in the rain shadow area of the Himalaya.

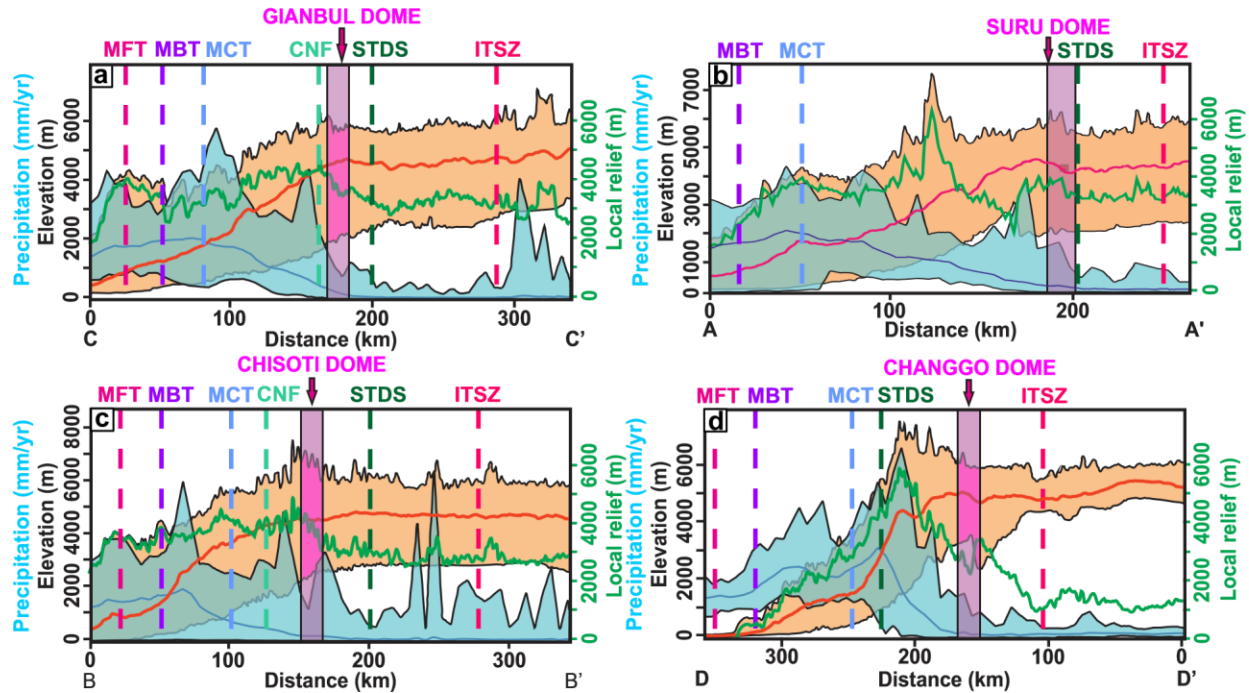

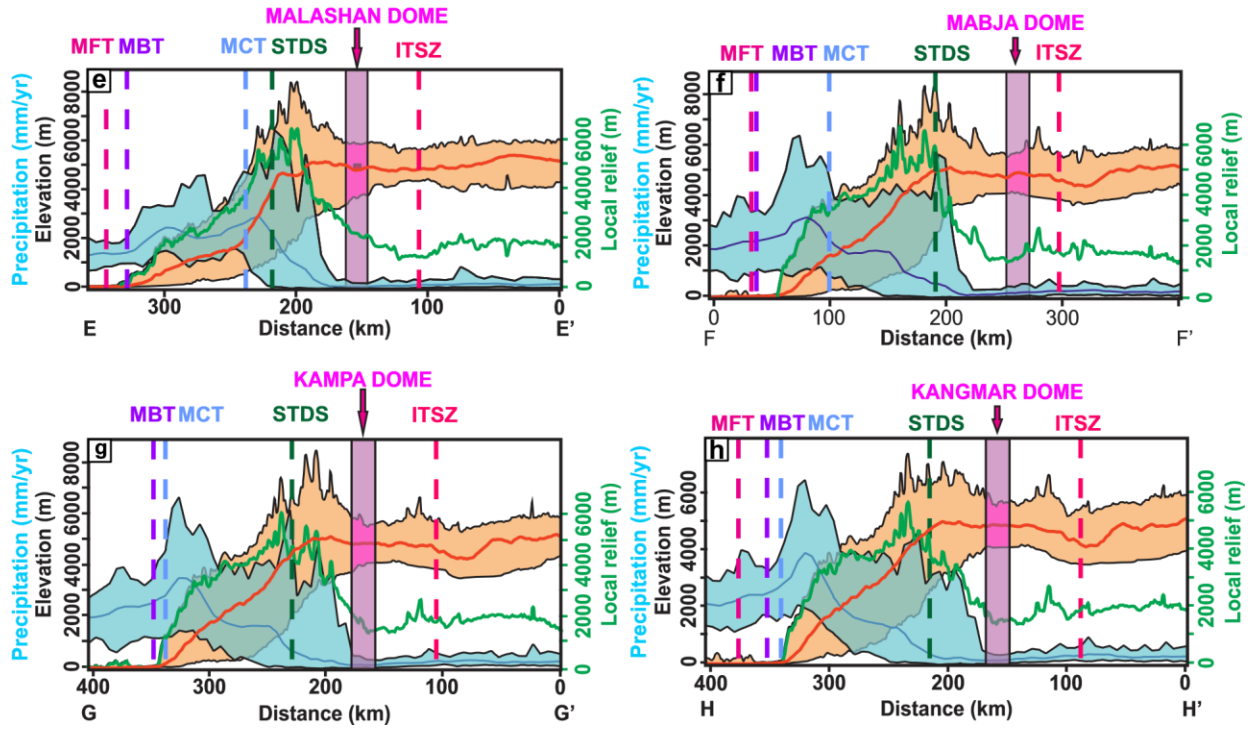

**Fig. S1:** Figures a-h illustrate the swath profiles for the gneissic domes in the Himalaya, having swath lines illustrated in Fig. 1.

## 2. Thermo-kinematic Modeling

Pecube is a finite element code (Braun, 2003) used for thermo-kinematic modeling, which solves the heat transport equation for the lithospheric plate/crust and helps understand the cooling age pattern in the orogenic belt. Kinematic modeling helps with the rock transport process using fault geometries, and the thermal model helps to calculate fault motion, surface erosion, and thermal properties (Braun, 2012). The Pecube tool is used for those tectonic crusts affected by the exhumation, denudation, and Surface uplift processes. In this modeling, we used different parameters and the thermochronological ages mentioned in [Supplementary Table S1a-b](#) and [Table S3](#). In the output VTK file, we visualize the isotherm profile in the 3D model, and those 3D models are shown in [Supplementary Fig. S2, S8, S11, S14, S17, S20, and S23](#). Pecube is a Fortran90 code

Program compiled by using the GCC compiler, and all the installation processes are mentioned in the user guide provided by Jean Braun's GitHub page ([GitHub - jeanbraun/Pecube: Thermo-kinematic model to invert thermochronological data](#)). Broun mentioned all the fundamental equations (Braun, 2003; Braun et al., 2012), it is a great tool for geological research (Coutand et al., 2014). Finally, Pecube gives the synthetic cooling ages and exact activation time using the observed cooling ages and different fault geometries for thermo-kinematic modeling. In this case, we performed both forward and inverse models to determine the timing of activation of those gneissic domes (See Fig. 1).

The heat transportation equation is:

$$pc \left( \frac{\partial T}{\partial t} + v \frac{\partial T}{\partial z} \right) = \frac{\partial}{\partial x} k \frac{\partial T}{\partial x} + \frac{\partial}{\partial y} k \frac{\partial T}{\partial y} + \frac{\partial}{\partial z} k \frac{\partial T}{\partial z} + pA$$

Where x,y, and z are the coordinates in the three directions,

t = time (Ma),

T = Temperature (°C),

p = Density of the rock (kg /m<sup>3</sup>)

c = Heat capacity (J kg<sup>-1</sup> K<sup>-1</sup>)

v = Vertical Velocity of the rock (km Ma<sup>-1</sup>)

k = conductivity (W m<sup>-1</sup> k<sup>-1</sup>)

A = Radiogenic heat production (μW m<sup>-3</sup>)

k, ck, and p remain constant through time.

This heat-transport equation solves and reflects denudation, and surface changes the rock particle transport in both the vertical and lateral directions, reflected in the 3D model.

## 2.1 Forward Modeling

We performed a 3D forward model using Pecube (Braun, 2003; Braun et al., 2012),

representing the geothermal gradient profile by solving the heat-transport equation. For the 3D models, we used present-day surface topography as a dat file extracted from SRTM 30m DEM ([Open Topography](#)), where we used different parameters, such as heat production, thermal diffusivity, basal temperature, fault advection, etc., to predict cooling ages for different gneissic domes in the Himalaya ([Adlakha et al., 2013](#)).

In this modeling, fault motion was the dip-slip along the fault model, and all those fault parameters were taken from different research papers given in the supplementary discussion section 2.3.1-2.3.7, whereas shear heating and isostasy are not considered for the evolution of this gneissic dome due to its minimal effect ([Herman et al., 2010](#)), while fault advection parameter are considered. Here, in the forward model, we performed two times kinematics tectonic scenarios using the Muscovite Argon (MAr), Biotite Argon (BAr), Zircon Fission Track (ZFT), Zircon Helium (ZHe), and Apatite Fission Track (AFT) ages ([Supplementary Table S1a-b](#)) for the forward and inverse modeling. Finally, the root mean square (RMS) misfit between observed and predicted ages is expressed over a million years ([See modeling discussion](#)).

In this study, we have used only the flat ramp model, where we have utilized different in-depth data and earthquake data from various research papers, and the details of the fault data are discussed in the modeling discussion section. For the 3D model, we have considered the MHT, MCT, STDS, and local-scale faults taken from different research papers given in the model discussion section, where the convergence rate has been kept constant at  $\sim 17\text{-}24$  km/Myr, partitioned into underthrusting and overthrusting segments ([Decelles et al., 2004](#); [Avouac, 2003](#); [Herman et al., 2010](#)).

## **2.2 Inverse Modeling**

Inverse modeling is done using the Neighborhood Algorithm ([Sambridge, 1999b, 1999a](#)),

which runs several forward models to determine the best-fit outcome, where each dot represents a forward model. To employ the inverse model, we need to set the parameters for forward modeling, whereas, for the inverse model, we can set the range of different parameters for the inverse model to find the best fit. The inverse model's result is displayed in [Supplementary Figs. S4, S10, S13, S16, S19, S22, and S25](#).

The misfit was calculated using the formula:

$$M = \sqrt{\frac{1}{N} \sum_{i=1}^N \frac{(O_i - P_i)^2}{\sigma_i^2}}$$

Where N = Number of data points for the thermochronometer.

$O_i$  = Observed ages,

$P_i$  = Predicted ages,

$\sigma_i$  =  $1\sigma$  uncertainty in observed ages.

The neighborhood algorithm's importance is that it searches for the best fit among multiple parameters and minimizes the misfit between predicted and observed data ([Sambridge, 1999a](#)).

## 2.3 Modeling Discussion

### 2.3.1 Gianbul Dome

The Gianbul dome was modeled using the fault geometry from [Hazarika et al. \(2017\)](#), exhibiting a two-stage tectonic scenario from 26 million years ago to the present day. To simulate the model, we used four fault data employed for the 3D modeling, with two faults (MHT and MCT) modeled as thrust fault geometry, while the other two faults (CNF and STDS) were modeled as normal fault geometry. Whereas the CNF fault data was obtained from ([Yadav et al., 2016](#)), and

MCT structure was obtained using inverse modeling, with the ranges given in [Supplementary Table S4](#). For the Forward model, the thickness was set to 40 km, and all the parameters used for the modeling are listed in [Supplementary Table S3](#). To run this model, we employed five types of thermochronological data (MAr, BAr, ZFT, ZHe, and AFT) (See Table S1a-b), age elevation relation parameter, and fault advection parameter were incorporated, while the fission track predicted data model was based on the Richard Ketcham routine. The period of activity of MHT was considered from 26 million years ago to the present day, while in the case of MCT, only a one-time scenario was taken between 21-20 Ma, as no significant effect on the predicted age model was observed if we activated it for other times, especially considered for the Gianbul Dome. In contrast, for STDS, two time scenarios were taken between 21 to 20 Ma and 6.5 to 6 Ma, whereas in both the tectonic scenarios, STDS was considered a normal fault geometry to satisfy all the synthetic ages with the observed ones. The same approach was modeled for CNF, which was considered for two-time scenarios between 21-20 Ma and 6.5 to 6 Ma. As a result, the best RMS misfit is 2.36 Ma for the forward model, and all the forward and inverse model figures are attached in the [supplementary Fig. S2-S4](#) and have ranges for the inverse model and misfit, as given in [Supplementary Table S4](#).

**The table below shows the number of model scenario tests to constrain the best RMS misfit.**

| Dome Names                               | Faults                                                      | Fault Parameters Used                                                                                   | RMS Misfit (Ma)                                      | RMS Total Misfit (Ma)                                                         |
|------------------------------------------|-------------------------------------------------------------|---------------------------------------------------------------------------------------------------------|------------------------------------------------------|-------------------------------------------------------------------------------|
| Gianbul Dome<br><br>(AFT, ZFT, MAr, BAr) | Model Scenario 1<br>(Except MCT 2 <sup>nd</sup> activation) | MHT (26 Ma-0 Ma)<br>MCT (21 Ma-20Ma)<br>CNF (21Ma-20 Ma, 6.5 Ma-6.0 Ma)<br>STDS (21Ma-20 Ma, 6.5 Ma-6.0 | AFT = 1.57<br>ZFT = 2.55<br>MAr = 2.55<br>BAr = 2.50 | 2.36<br>(Least Misfit of all model scenarios)<br><br><b>Most Viable Model</b> |

|  |                                                        |                                                                                                                             |                                                          |       |
|--|--------------------------------------------------------|-----------------------------------------------------------------------------------------------------------------------------|----------------------------------------------------------|-------|
|  |                                                        | Ma)                                                                                                                         |                                                          |       |
|  | Model Scenario 2<br>(Two-time Activation)              | MHT (26 Ma-0 Ma)<br>MCT (21 Ma-20 Ma, 6.5 Ma-6.0 Ma)<br>CNF (21Ma-20 Ma, 6.5 Ma-6.0 Ma)<br>STDS (21Ma-20 Ma, 6.5 Ma-6.0 Ma) | AFT = 1.58<br>ZFT = 2.92<br>MAr = 3.16<br>BAr = 2.85     | 2.77  |
|  | Model Scenario 3<br>(Exclude MCT)                      | MHT (26Ma-0Ma)<br>CNF (21Ma-20 Ma, 6.5 Ma-6.0 Ma)<br>STDS (21Ma-20 Ma, 6.5 Ma-6.0 Ma)                                       | AFT = 7.29<br>ZFT = 3.70<br>MAr = 2.46<br>BAr = 0.706    | 3.84  |
|  | Model Scenario 4<br>(STDS and CNF one-time activation) | MHT (26Ma-0Ma)<br>MCT (21 Ma-20Ma)<br>CNF (21Ma-20 Ma)<br>STDS (21Ma-20 Ma)                                                 | AFT = 5.904<br>ZFT = 3.018<br>MAr = 2.044<br>BAr = 1.613 | 3.24  |
|  | Model Scenario 5<br>(CNF one-time activation)          | MHT (26Ma-0Ma)<br>MCT (21 Ma-20Ma)<br>CNF (21Ma-20 Ma)<br>STDS (21Ma-20 Ma, 6.5 Ma-6.0 Ma)                                  | AFT = 3.81<br>ZFT = 2.25<br>MAr = 1.69<br>BAr = 2.12     | 2.47  |
|  | Model Scenario 6<br>(STDS one-time activation)         | MHT (26Ma-0Ma)<br>MCT (21 Ma-20Ma)<br>CNF (21Ma-20                                                                          | AFT = 4.23<br>ZFT = 3.04<br>MAr = 2.75<br>BAr = 2.31     | 3.054 |

|                                                                                                         |                                   |                                                                                                                                                               |                                                                         |       |
|---------------------------------------------------------------------------------------------------------|-----------------------------------|---------------------------------------------------------------------------------------------------------------------------------------------------------------|-------------------------------------------------------------------------|-------|
|                                                                                                         |                                   | Ma, 6.5 Ma-6.0 Ma)<br><b>STDS (21Ma-20 Ma)</b>                                                                                                                |                                                                         |       |
|                                                                                                         | Model Scenario 7<br>(Exclude MHT) | MCT (21Ma-20 Ma,<br>6.5 Ma-6.0 Ma)<br>CNF (21Ma-20 Ma, 6.5 Ma-6.0 Ma)<br>STDS (21Ma-20 Ma, 6.5 Ma-6.0 Ma)                                                     | AFT = 14.94<br>ZFT = 8.65<br>MAr = 5.07<br>BAr = 4.08                   | 8.302 |
| Gianbul Dome<br>(Include Data from MCT to STDS)<br>(AFT, ZFT, ZHe, MAR, BAR)<br>(See Figs. S2b and S3h) | Model Scenario 8                  | MHT (26Ma-0Ma)<br>MCT (22 Ma-21Ma, 10-8Ma, 6.02-5.9Ma, 3.11-3.25Ma)<br>CNF (23Ma-22 Ma, 10.28-10.07Ma, 5.7-3.2Ma)<br>STDS (21Ma-19 Ma, 6.9-5.9 Ma, 3.0-5.1Ma) | AFT = 2.326<br>ZFT = 3.032<br>ZHe = 2.927<br>MAr = 1.896<br>BAr = 2.636 | 2.578 |

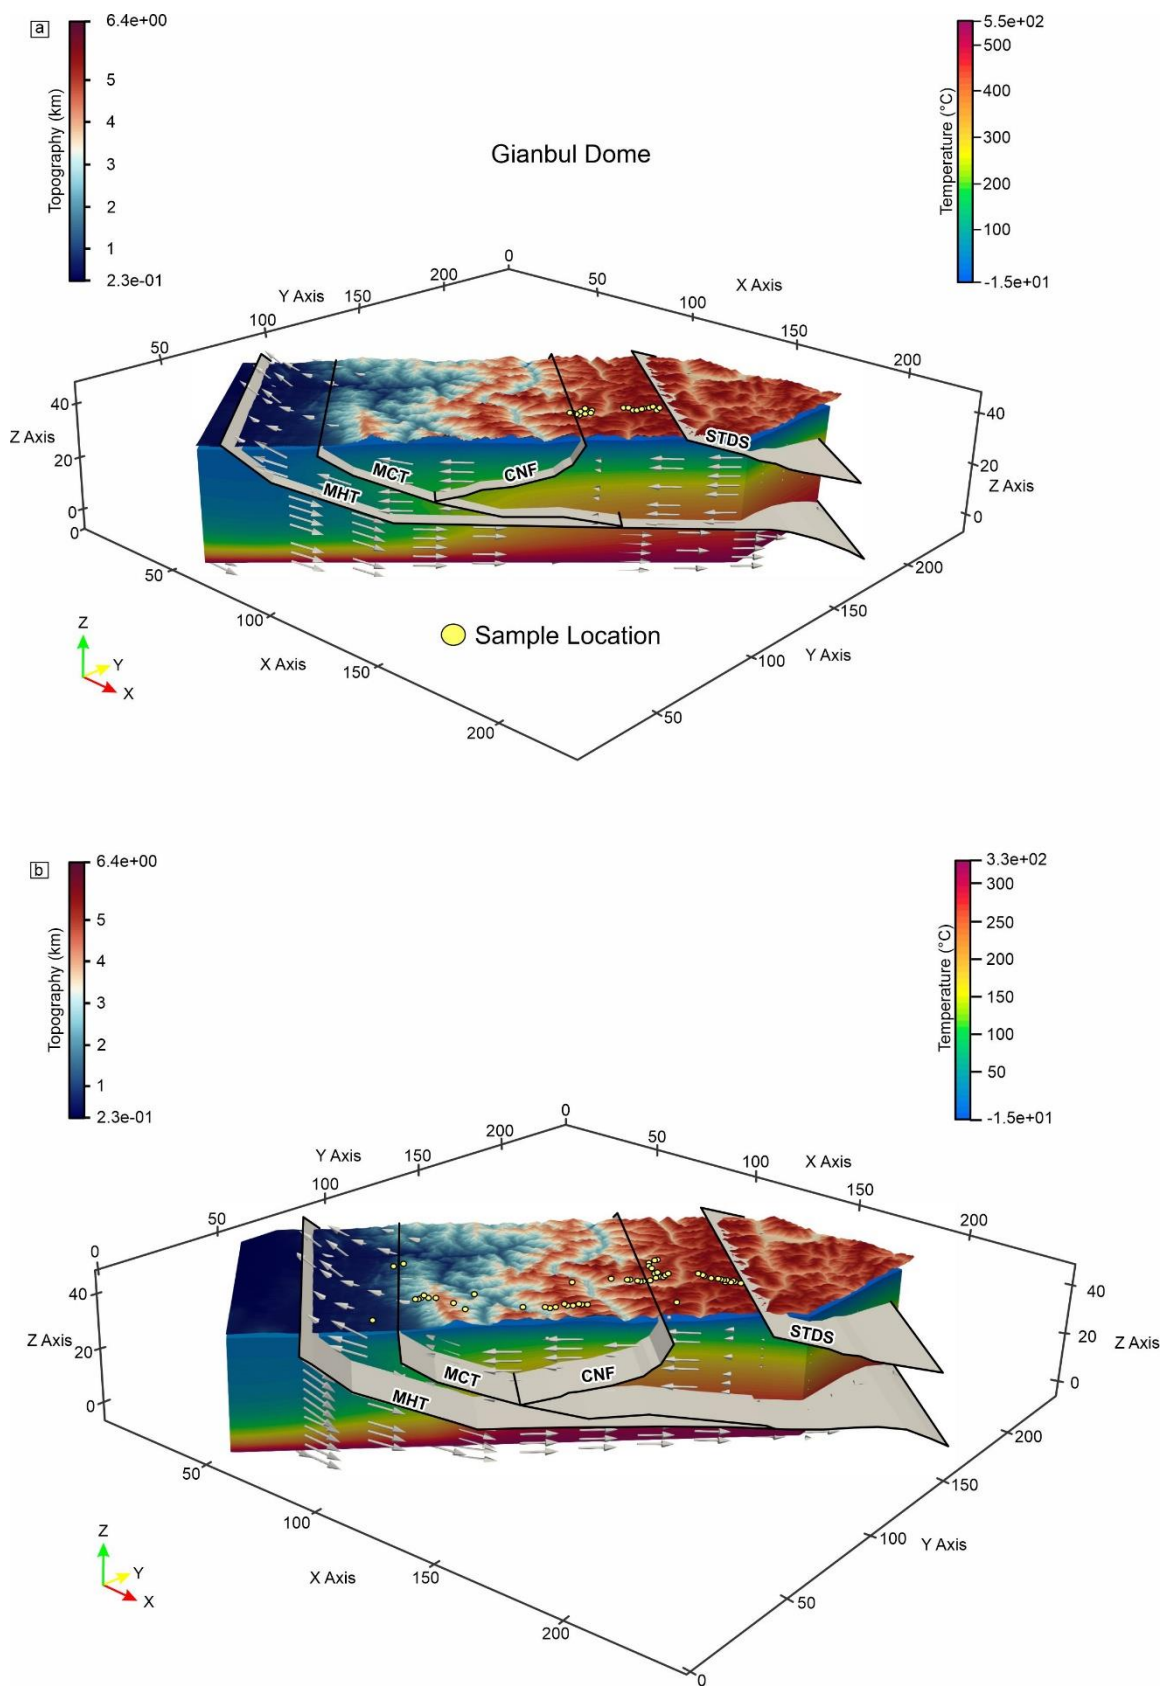

Fig. S2

**Fig. S2:** Figure (a,b) shows the 3D model for the Gianbul Dome, where isotherms and velocity vectors demonstrated in the cross-section are constrained after employing the Pecube Forward model.

# Gianbul Dome

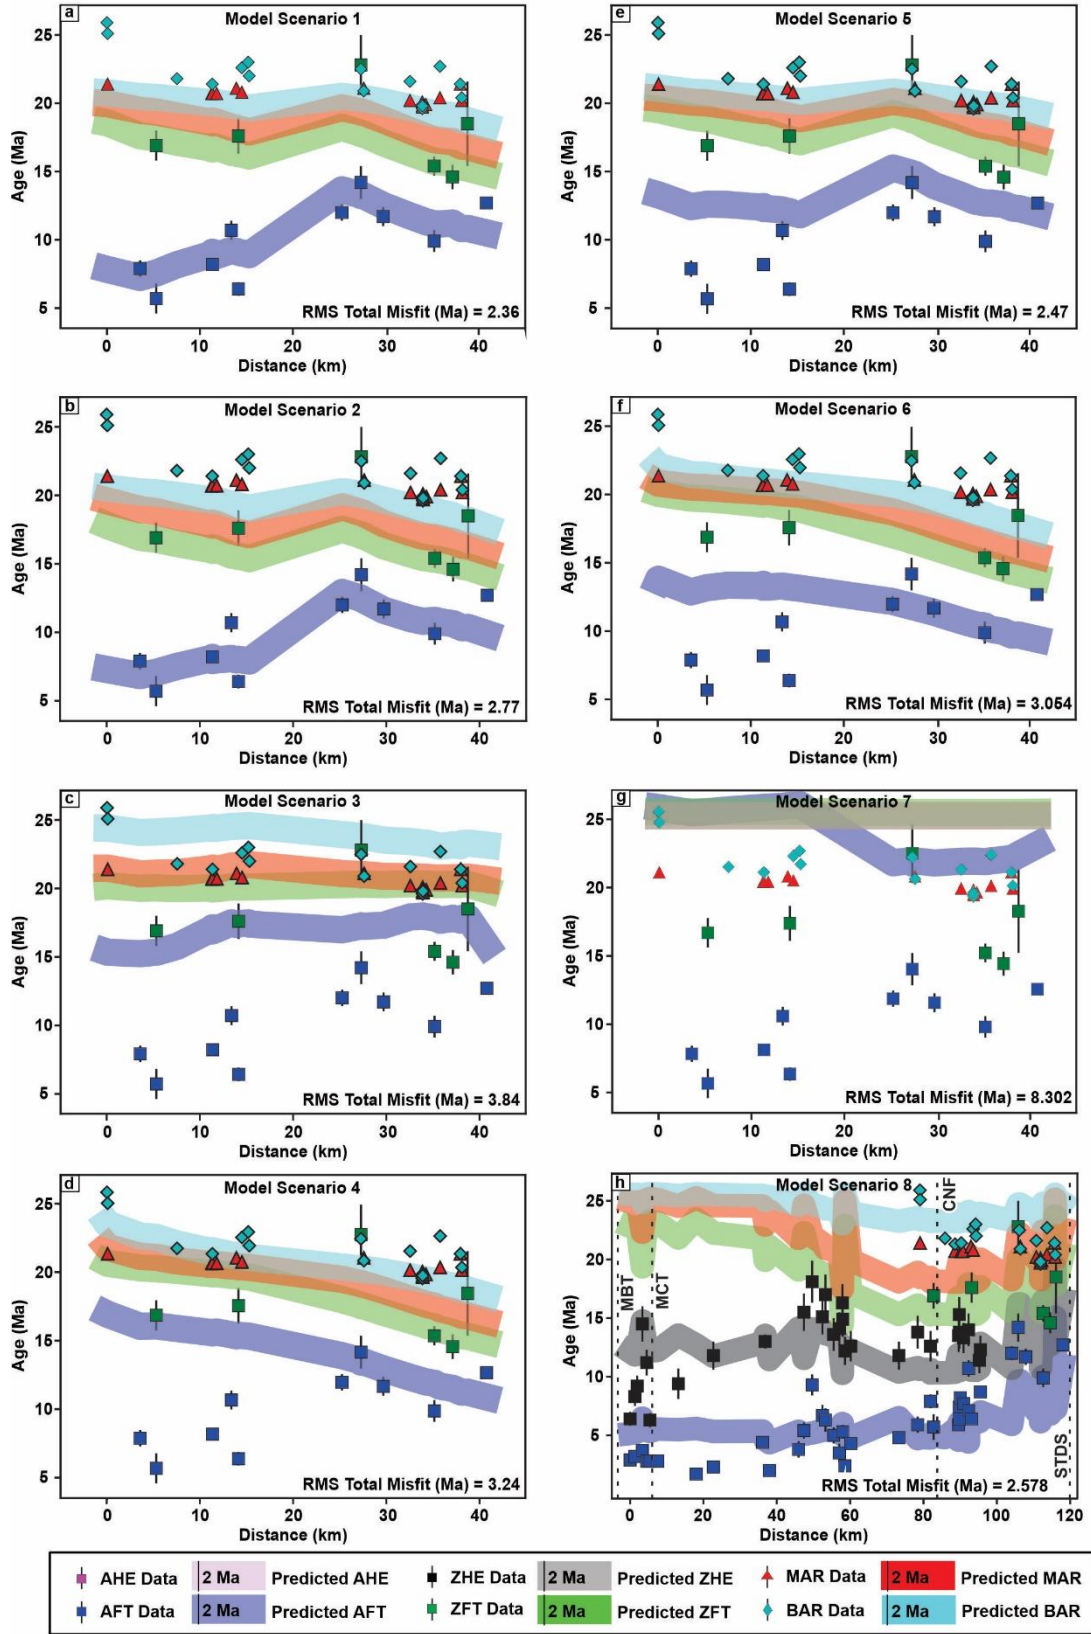

Fig. S3

**Fig. S3:** Figures a-h illustrate the age distance plot for the observed and predicted for Gianbul domes in the Himalaya after Pecube forward models.

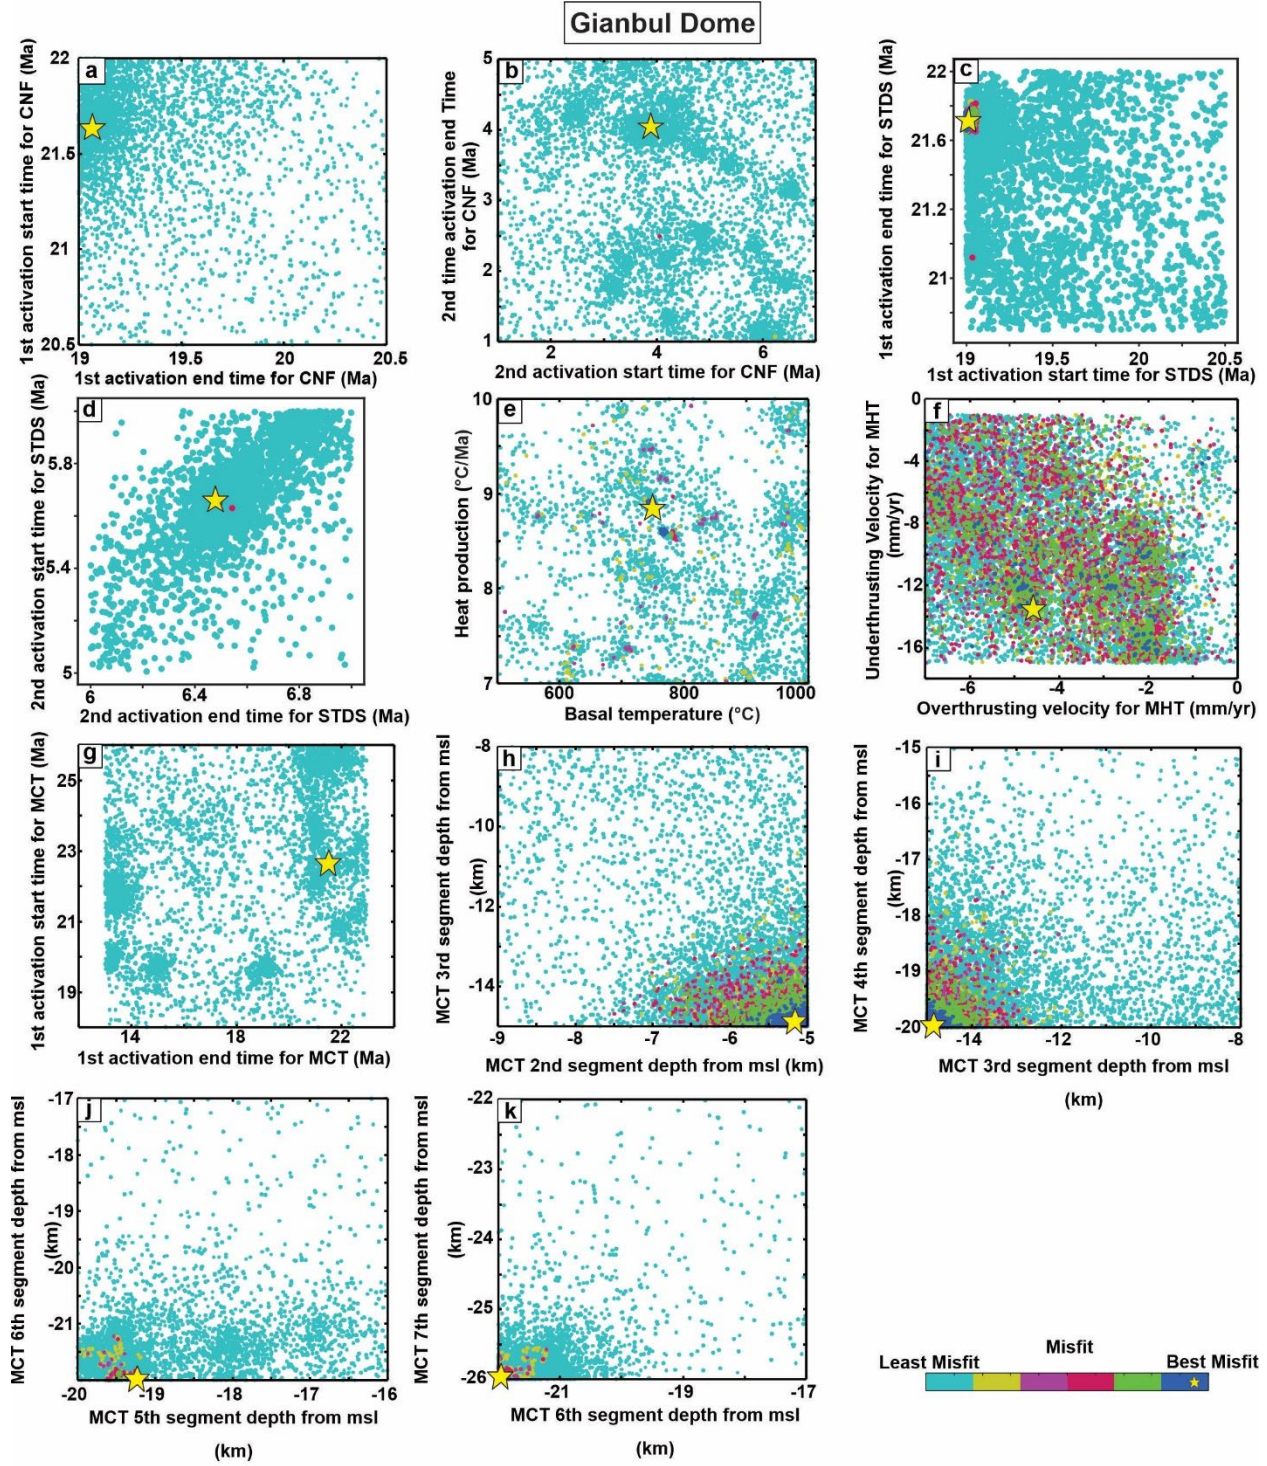

**Fig. S4**

**Fig. S4:** Figures a-k show the results of inverse model plots for different parameters for the Gianbul Dome, where the yellow star mark represents the best fit.

### 2.3.1.1 Field Evidence

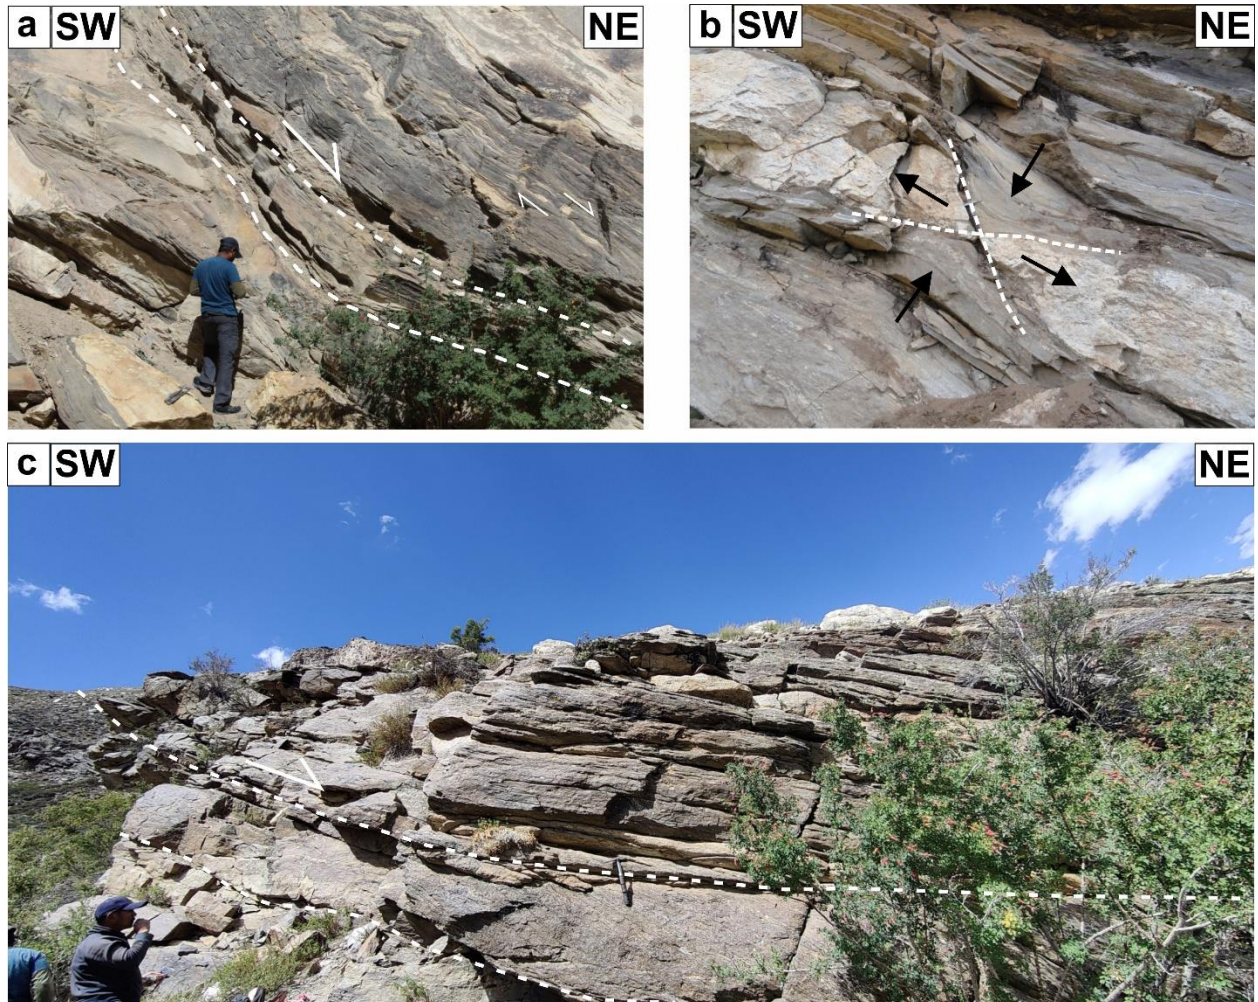

**Fig. S5**

**Fig. S5:** Figures a-c illustrates the concave upward structure of the Gianbul Dome.

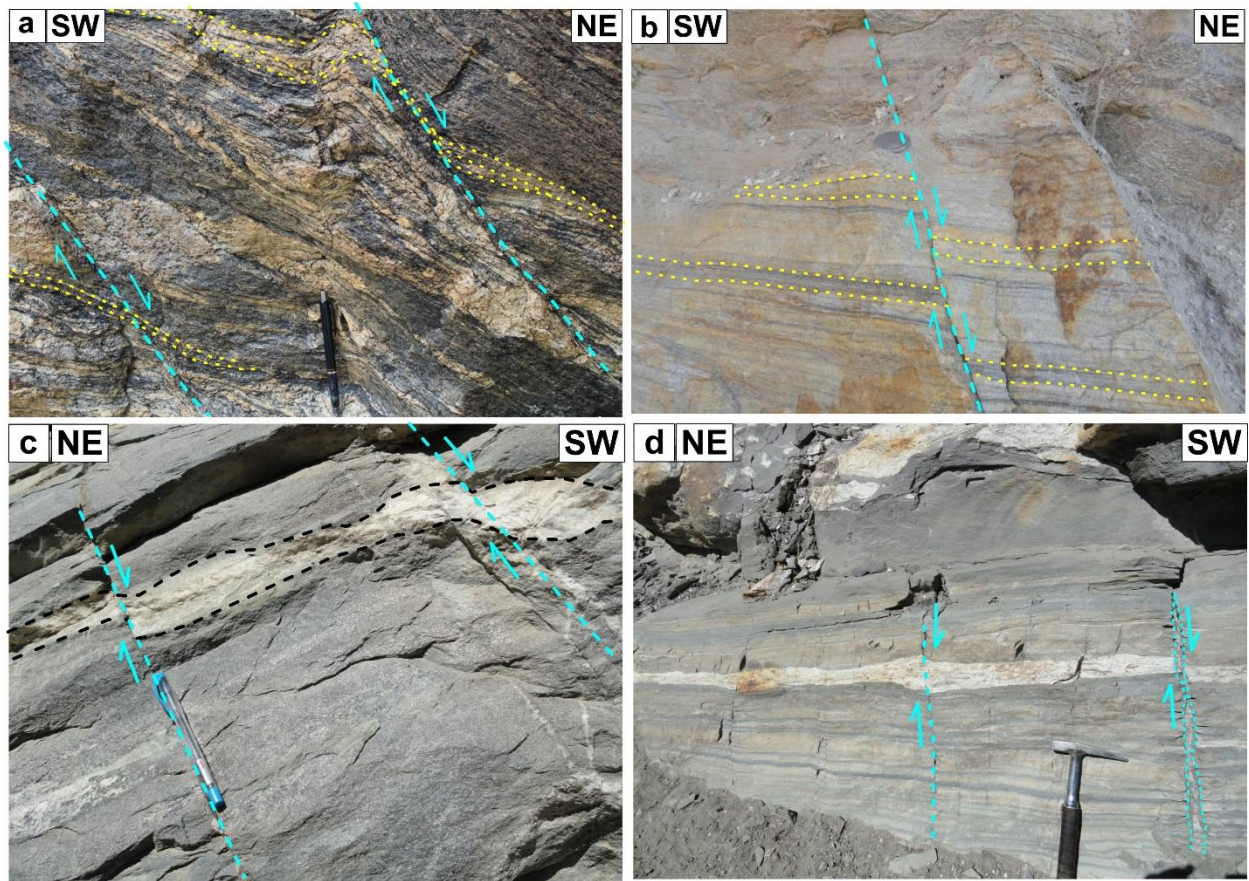

**Fig. S6**

**Fig. S6:** Figures a-d illustrate the Normal fault brittle deformation structure of the Gianbul Dome.

### 2.3.1.2 K<sub>sn</sub> for Gianbul Dome

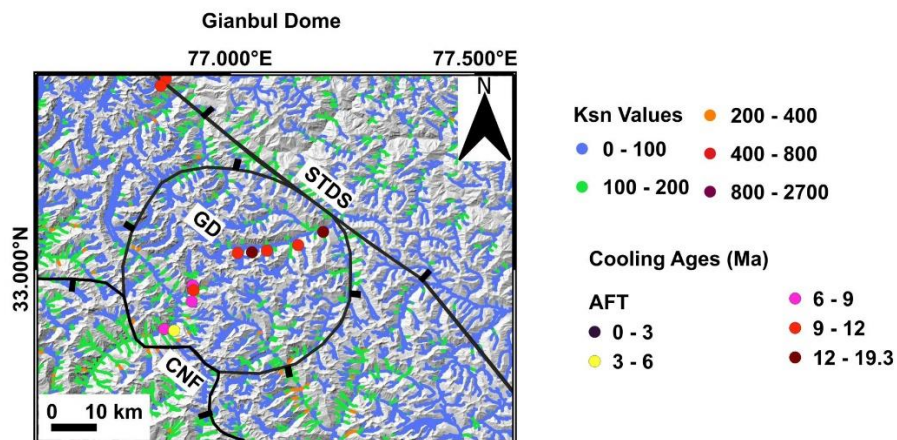

**Fig. S7**

**Fig. S7:** The Figure shows the Ksn results with the youngest cooling ages at Gianbul Dome.

### 2.3.2 Suru Dome

For Suru Dome, we used three faults to simulate the 3D forward model, which has a thickness of 35 km, with nx being 10616 and ny being 8564, where two faults were modeled into thrust faults (MHT and MCT), and two fault was modeled as a normal fault (CNF and STDS) to incorporate the cooling ages (AFT, ZFT and BAr), and different parameters data used given in [Supplementary Tables S3 and S4](#). Our modeling technique encompasses two-step tectonomorphic scenarios using Richard Ketcham's routine for synthetic age prediction. The fault data was obtained from (Hazarika et al., 2017), and the MCT fault data is the inverse model data. We modeled the CNF and STDS as a normal fault in two time scenarios (from ~21 Ma to ~20 Ma for the first scenario and from ~6.5 Ma to ~4 Ma for the second scenario), whereas MCT was modeled as a thrust for the time step between ~22 Ma to ~19 Ma. We took a second-step scenario for MCT, but it had minimal effects on the predicted data (See the table below), while MHT was considered a thrust fault that was active between ~23 Ma to the present time. In the forward model, we did not account for the relationship between age and elevation; instead, we measured the misfit weight to determine the difference between observed and predicted cooling ages. The forward model's result, with a best RMS misfit of 2.183 Ma, is displayed in [supplementary Fig. S8 and Fig. S9\(a-f\)](#), whereas the inverse model's result is shown in [supplementary Fig. S10 \(a-e\)](#). After forward modeling, we employed the inverse modeling using the neighborhood algorithm using Pecube, which has ranges and best fits, as given in [supplementary Table S4](#).

**The table below shows the number of model scenario tests to constrain the best RMS misfit.**

| Dome Names | Faults         | Fault Parameters Used | RMS Misfit (Ma) | RMS Total Misfit (Ma) |
|------------|----------------|-----------------------|-----------------|-----------------------|
|            | Model Scenario | MHT (23Ma-            | AFT = 1.584     | 2.183                 |

|           |                                                             |                                                                                                                                 |                                           |                          |
|-----------|-------------------------------------------------------------|---------------------------------------------------------------------------------------------------------------------------------|-------------------------------------------|--------------------------|
| Suru Dome | 1<br>(Two-time Activation)                                  | 0Ma)<br>MCT (21.95 Ma-19.72 Ma, 6.5 Ma – 6 Ma)<br>CNF (21Ma-20 Ma, 6.5 Ma-6.0 Ma)<br>STDS (20.95 Ma-19.82 Ma, 6.2 Ma - 4.32 Ma) | ZFT = 2.191<br>BAr = 4.614                | <b>Most Viable Model</b> |
|           | Model Scenario 2<br>(Except MCT 2 <sup>nd</sup> activation) | MHT (23Ma-0Ma)<br>MCT (21.95 Ma-19.72 Ma)<br>CNF (21Ma-20 Ma, 6.5 Ma-6.0 Ma)<br>STDS (20.95 Ma-19.82 Ma, 6.2 Ma - 4.32 Ma)      | AFT = 1.57<br>ZFT = 2.74<br>BAr = 4.59    | 2.194                    |
|           | Model Scenario 3<br>(Exclude MCT)                           | MHT (23Ma-0Ma)<br>CNF (21Ma-20 Ma, 6.5 Ma-6.0 Ma)<br>STDS (20.95 Ma-19.82 Ma, 6.2 Ma - 4.32 Ma)                                 | AFT = 1.56<br>ZFT = 2.76<br>BAr = 4.621   | 2.199                    |
|           | Model Scenario 4<br>(STDS and CNF one-time activation)      | MHT (23Ma-0Ma)<br>MCT (21.95 Ma-19.72 Ma)<br>CNF (21Ma-20 Ma)<br>STDS (20.95 Ma-19.82 Ma)                                       | AFT = 1.925<br>ZFT = 3.656<br>BAr = 2.199 | 2.432                    |
|           | Model Scenario 5<br>(CNF one-time activation)               | MHT (26Ma-0Ma)<br>MCT (21 Ma-20Ma)                                                                                              | AFT = 2.007<br>ZFT = 3.275<br>BAr = 4.167 | 2.413                    |

|  |                                                |                                                                                                                         |                                           |       |
|--|------------------------------------------------|-------------------------------------------------------------------------------------------------------------------------|-------------------------------------------|-------|
|  |                                                | CNF (21Ma-20 Ma)<br>STDS (20.95 Ma-19.82 Ma, 6.2 Ma - 4.32 Ma)                                                          |                                           |       |
|  | Model Scenario 6<br>(STDS one-time activation) | MHT (23Ma-0Ma)<br>MCT (21.95 Ma-19.72 Ma, 6.5 Ma – 6 Ma)<br>CNF (21Ma-20 Ma, 6.5 Ma-6.0 Ma)<br>STDS (20.95 Ma-19.82 Ma) | AFT = 1.681<br>ZFT = 3.106<br>BAr = 4.479 | 2.253 |

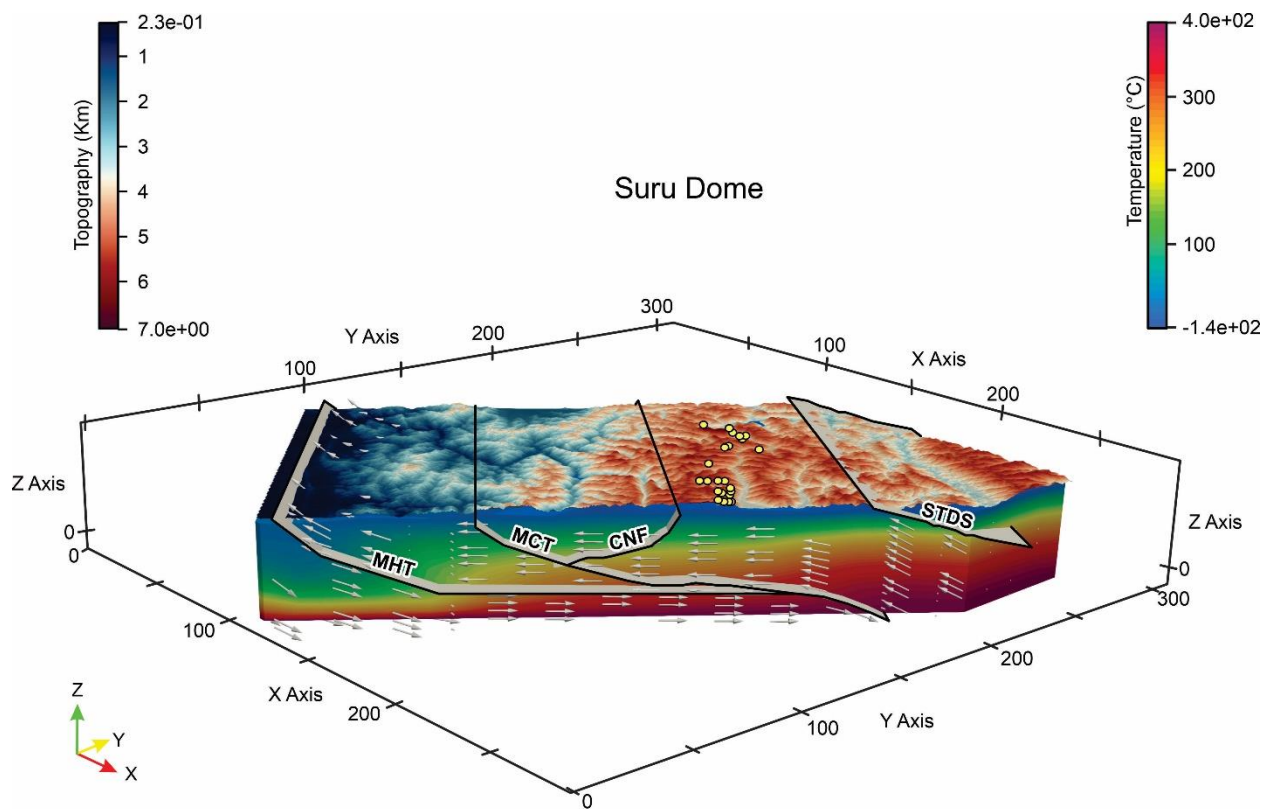

**Fig. S8**

**Fig. S8:** The figure shows the 3D model for the Suru Dome, where isotherms and velocity vectors

demonstrated in the cross-section are constrained after employing the Pecube Forward model.

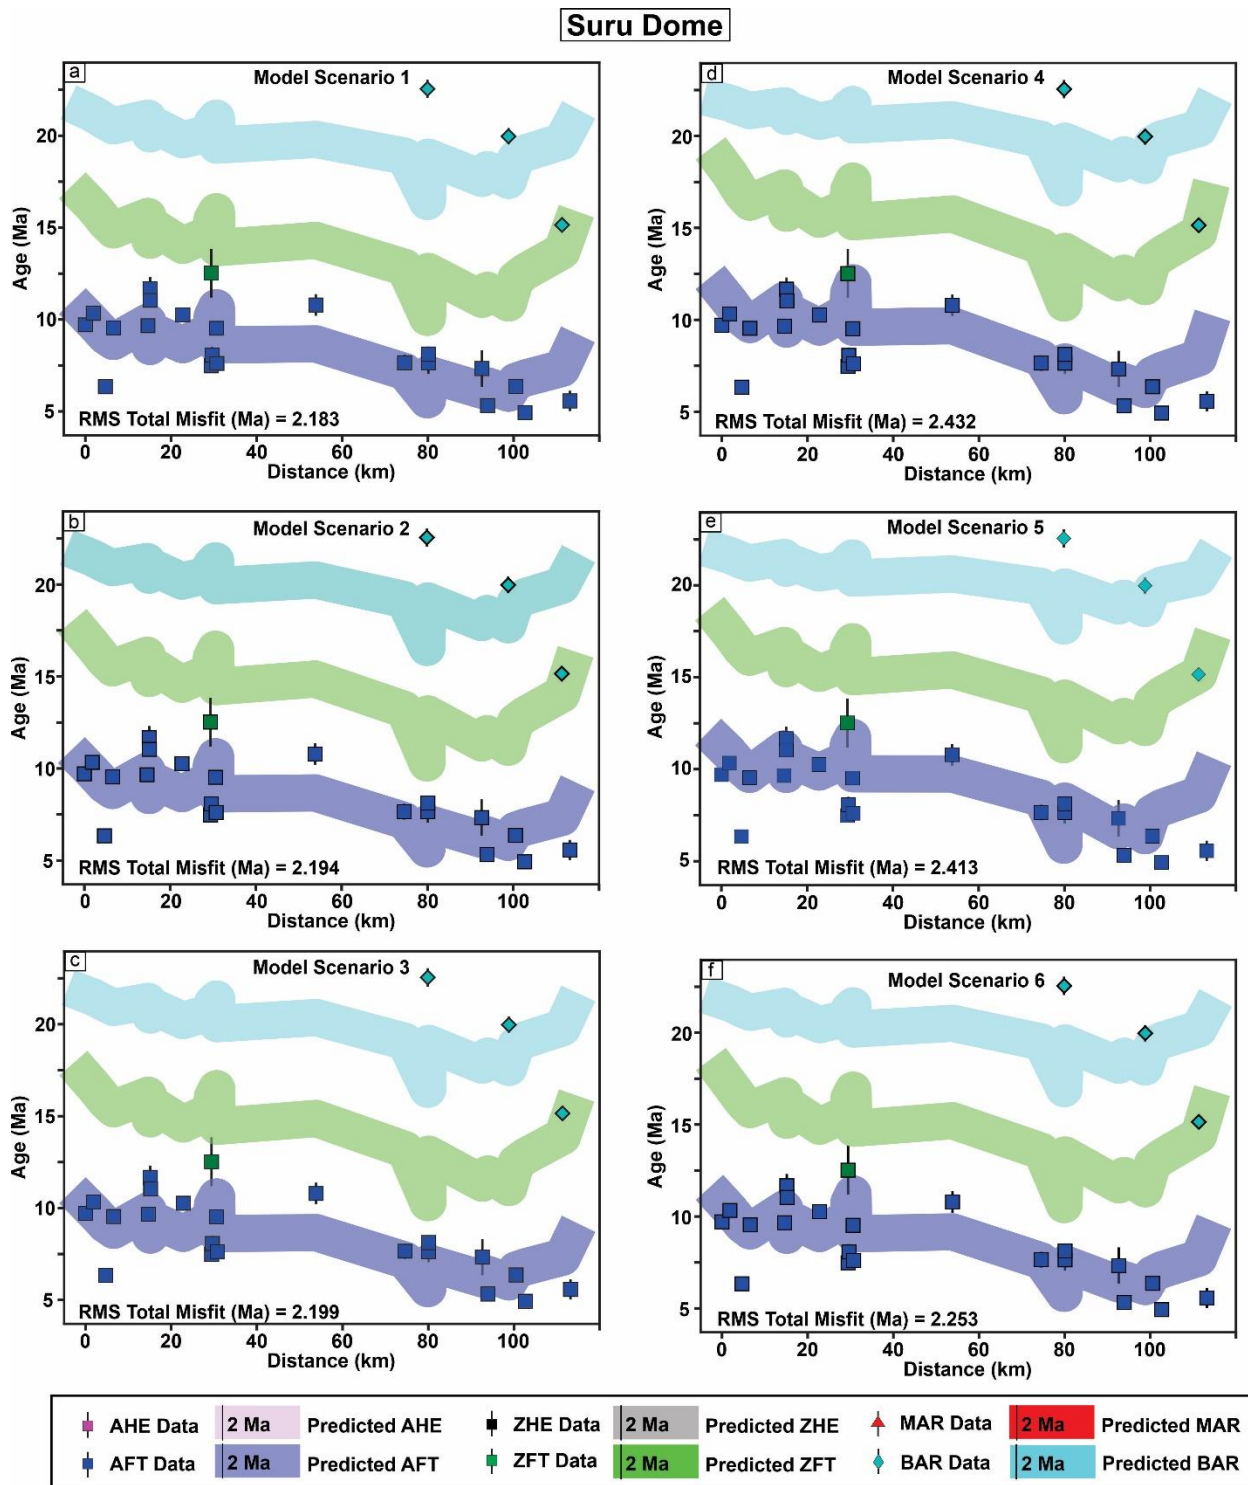

Fig. S9

**Fig. S9:** Figures a-f illustrate the age distance plot for the observed and predicted for Suru dome in the Himalaya after Pecube forward models.

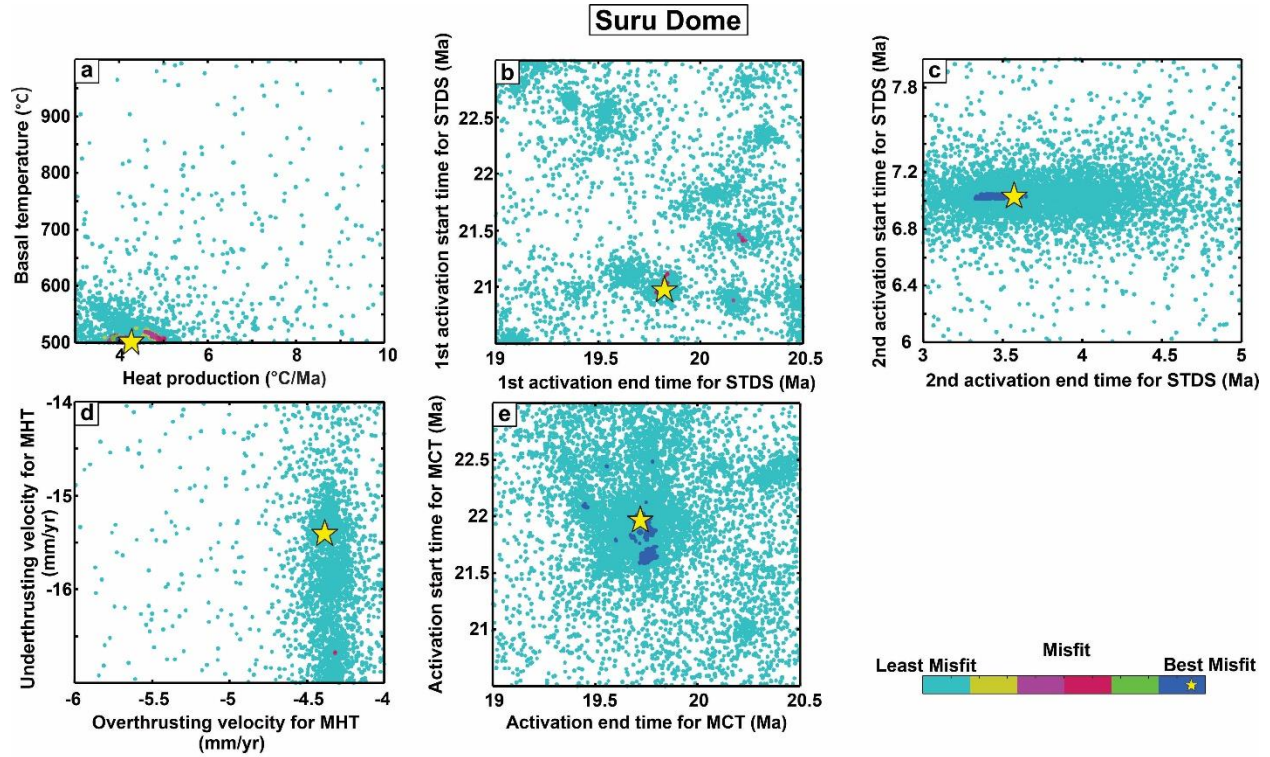

**Fig. S10**

**Fig. S10:** Figures a-e show the results of the inverse model for different parameters for the Suru Dome, where the yellow star mark represents the best fit.

### 2.3.3 Chisoti Dome

For the Chisoti dome, we considered the 3D model to have a thickness of 35 km where  $n_x$  is 10616 and  $n_y$  is 8564, from 23.7 Ma to the present time scenario using the Richard Ketcham routine for 3D modeling, where we used two types of cooling ages, AFT, ZFT, and BAr, which are given in the supplementary Table S1a. Among different parameters, we did not consider the age elevation case (overpredicting the synthetic cooling ages), shear heating, or isostasy case in our model (Herman et al., 2010). To simulate the above scenario, we used four fault data sets

(MHT, CNF, MCT, and STDS). Among four faults, MHT and STDS were taken from [Hazarika et al., 2017](#), CNF from [Yadav et al., 2016](#), and MCT structures obtained after inverse modeling, while MHT was considered a thrust fault active from 23.7 Ma to the present time, and for the CNF fault, we used two-time scenarios, 19.8-18 Ma and 6.10-3.9 Ma. Likewise, STDS is also modeled as a normal fault for two-time steps, which are between 20.9-19.2 Ma and 6.5-6 Ma. In contrast, the MCT modeled as a thrust fault is considered a one-time step during the ductile deformation between 21.0 and 19.2 Ma. The remaining parameters used in the inverse modeling are provided in Supplementary Table S4. The forward model's result, with a best RMS misfit of 3.0107 Ma ([supplementary Fig. S11 and Fig. S12 \(a-f\)](#)). After forward modeling, we employed the inverse modeling using the neighborhood algorithm using Pecube, which has the misfit, as given in [supplementary Fig. S13 \(a-h\)](#).

**The table below shows the number of model scenario tests to constrain the best RMS misfit.**

| Dome Names   | Faults                                                      | Fault Parameters Used                                                                                                                 | RMS Misfit (Ma)                           | RMS Total Misfit (Ma)                  |
|--------------|-------------------------------------------------------------|---------------------------------------------------------------------------------------------------------------------------------------|-------------------------------------------|----------------------------------------|
| Chisoti Dome | Model Scenario 1<br>(Two-time Activation)                   | MHT (23.7 Ma-0Ma)<br>MCT (21 Ma-19.2 Ma, 6.5 Ma - 6 Ma)<br>CNF (19.8Ma-18 Ma, 6.1 Ma-3.9 Ma)<br>STDS (20.9 Ma-19.2 Ma, 6.5 Ma - 6 Ma) | AFT = 1.869<br>ZFT = 4.425<br>BAr = 4.318 | 3.0107<br><br><b>Most Viable Model</b> |
|              | Model Scenario 2<br>(Except MCT 2 <sup>nd</sup> activation) | MHT (23.7 Ma-0Ma)<br><b>MCT (21 Ma-19.2 Ma)</b><br>CNF (19.8Ma-18 Ma, 6.1 Ma-3.9 Ma)                                                  | AFT = 1.866<br>ZFT = 4.896<br>BAr = 4.044 | 3.058                                  |

|  |                                                        |                                                                                                         |                                             |        |
|--|--------------------------------------------------------|---------------------------------------------------------------------------------------------------------|---------------------------------------------|--------|
|  |                                                        | STDS (20.9 Ma-19.2 Ma, 6.5 Ma - 6 Ma)                                                                   |                                             |        |
|  | Model Scenario 3<br>(Exclude MCT)                      | MHT (23.7 Ma-0Ma)<br>CNF (19.8Ma-18 Ma, 6.1 Ma-3.9 Ma)<br>STDS (20.9 Ma-19.2 Ma, 6.5 Ma - 6 Ma)         | AFT = 1.87<br>ZFT = 4.85<br>BAr = 4.036     | 3.045  |
|  | Model Scenario 4<br>(STDS and CNF one-time activation) | MHT (23.7 Ma-0Ma)<br>MCT (21 Ma-19.2 Ma)<br>CNF (19.8Ma-18 Ma)<br>STDS (20.9 Ma-19.2 Ma)                | AFT = 14.00<br>ZFT = 10.928<br>BAr = 5.809  | 12.343 |
|  | Model Scenario 5<br>(CNF one-time activation)          | MHT (23.7 Ma-0Ma)<br>MCT (21 Ma-19.2 Ma)<br>CNF (19.8Ma-18 Ma)<br>STDS (20.9 Ma-19.2 Ma, 6.5 Ma - 6 Ma) | AFT = 12.067<br>ZFT = 10.365<br>BAr = 4.776 | 10.764 |
|  | Model Scenario 6<br>(STDS one-time activation)         | MHT (23.7 Ma-0Ma)<br>MCT (21 Ma-19.2 Ma)<br>CNF (19.8Ma-18 Ma, 6.1 Ma-3.9 Ma)<br>STDS (20.9 Ma-19.2 Ma) | AFT = 1.848<br>ZFT = 7.256<br>BAr = 3.422   | 3.633  |

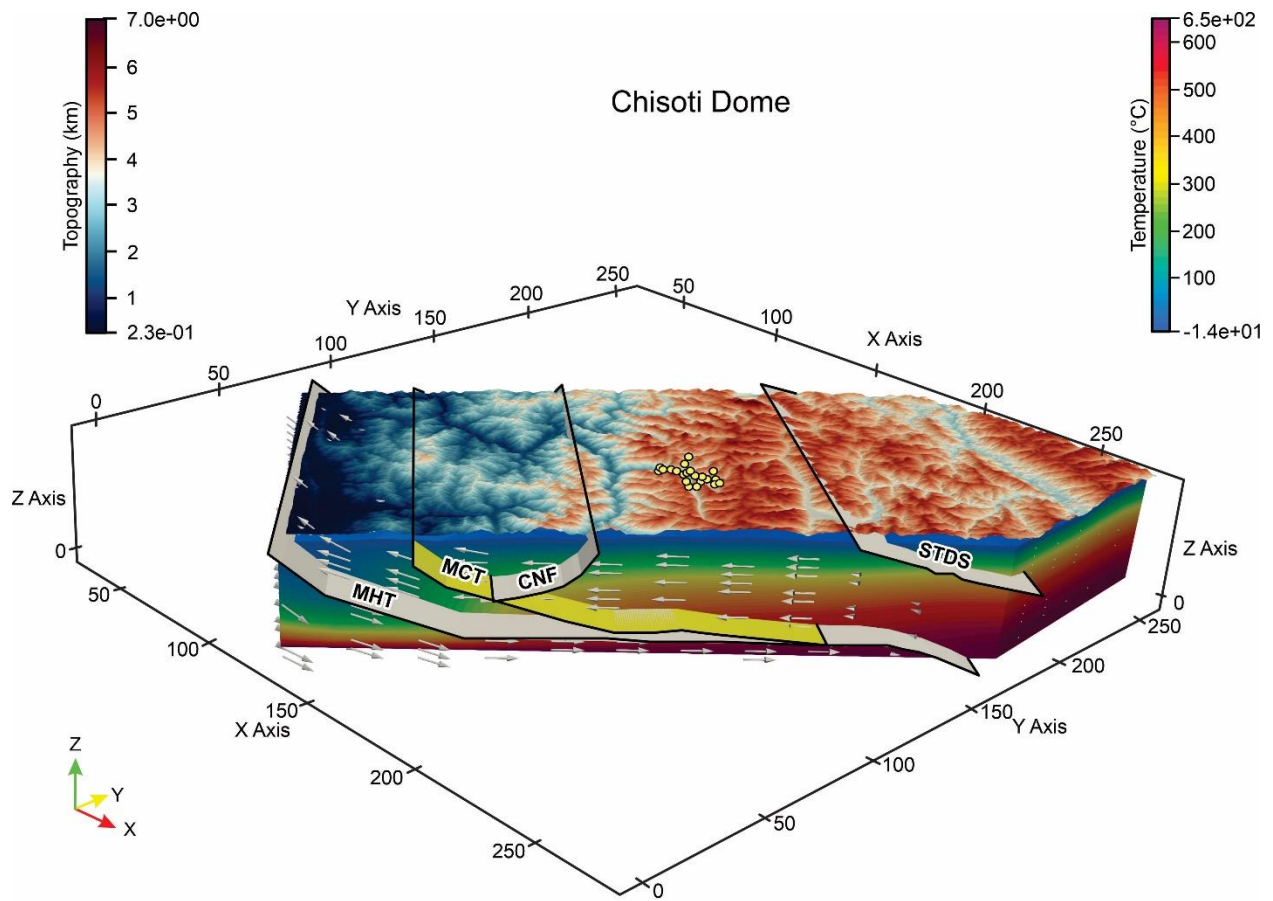

**Fig. S11**

**Fig. S11:** The figure shows the 3D model for the Chisoti Dome, where isotherms and velocity vectors demonstrated in the cross-section are constrained after employing the Pecube Forward model.

# Chisoti Dome

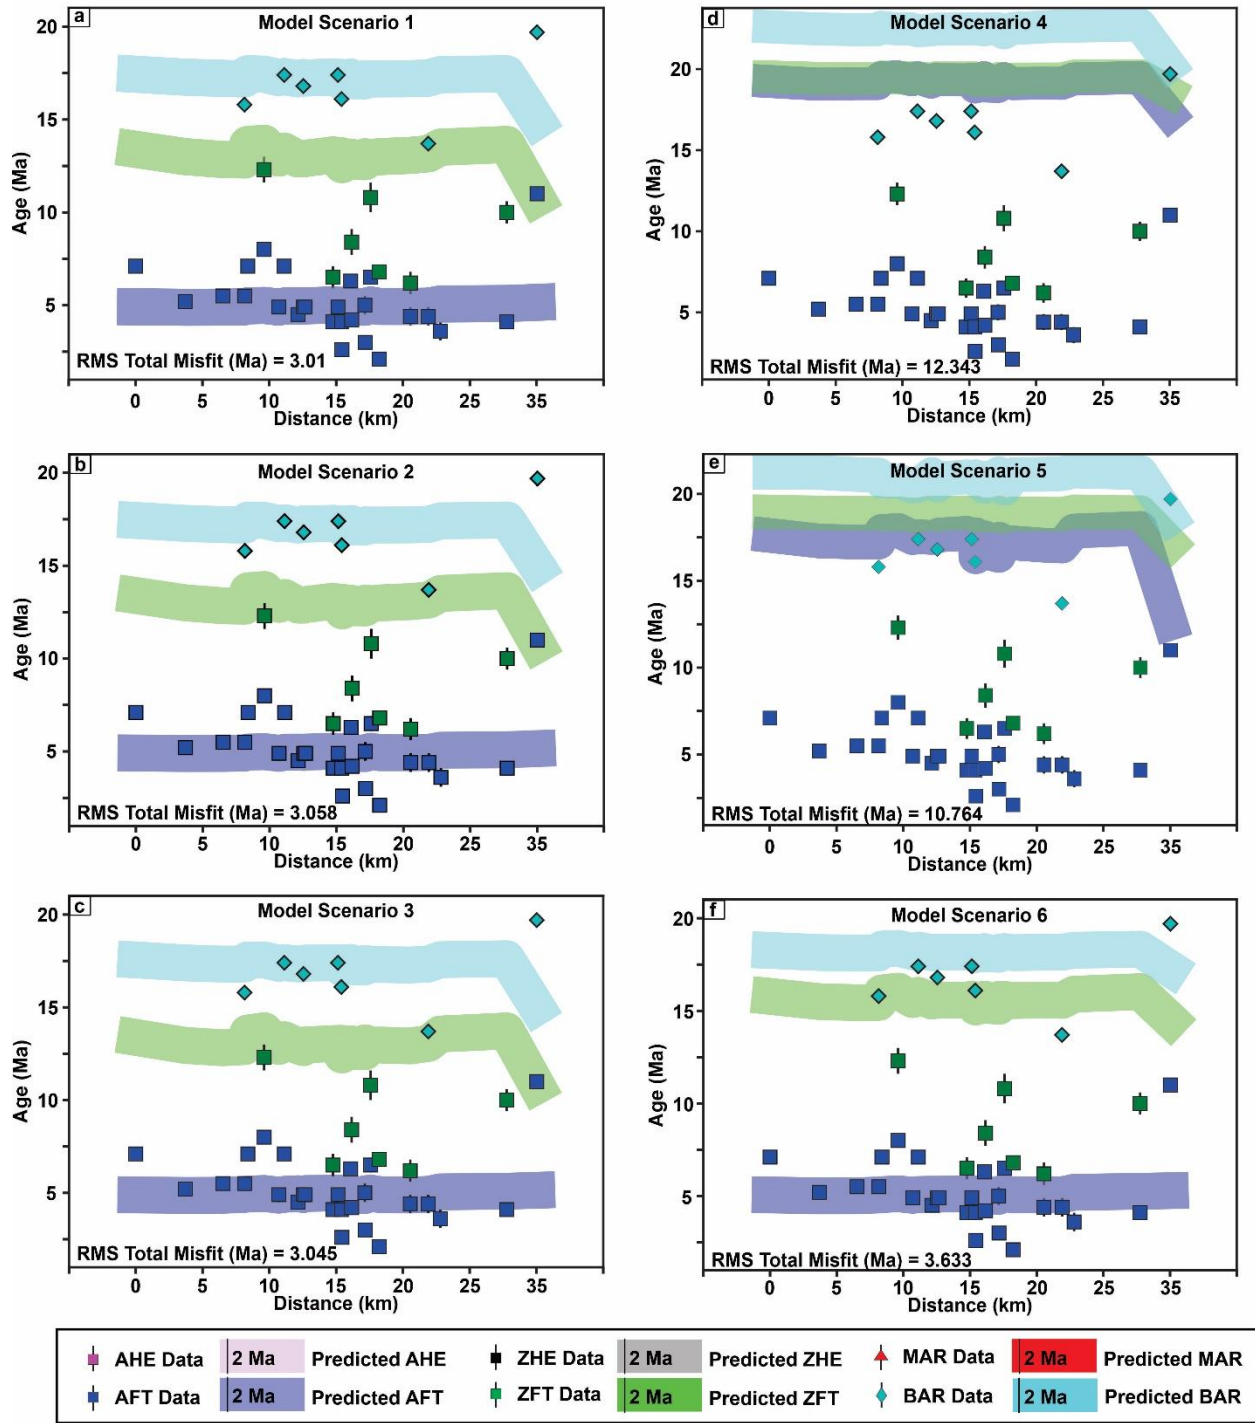

Fig. S12

**Fig. S12:** Figures a-f illustrate the age distance plot for the observed and predicted for Chisoti domes in the Himalaya after Pecube forward models.

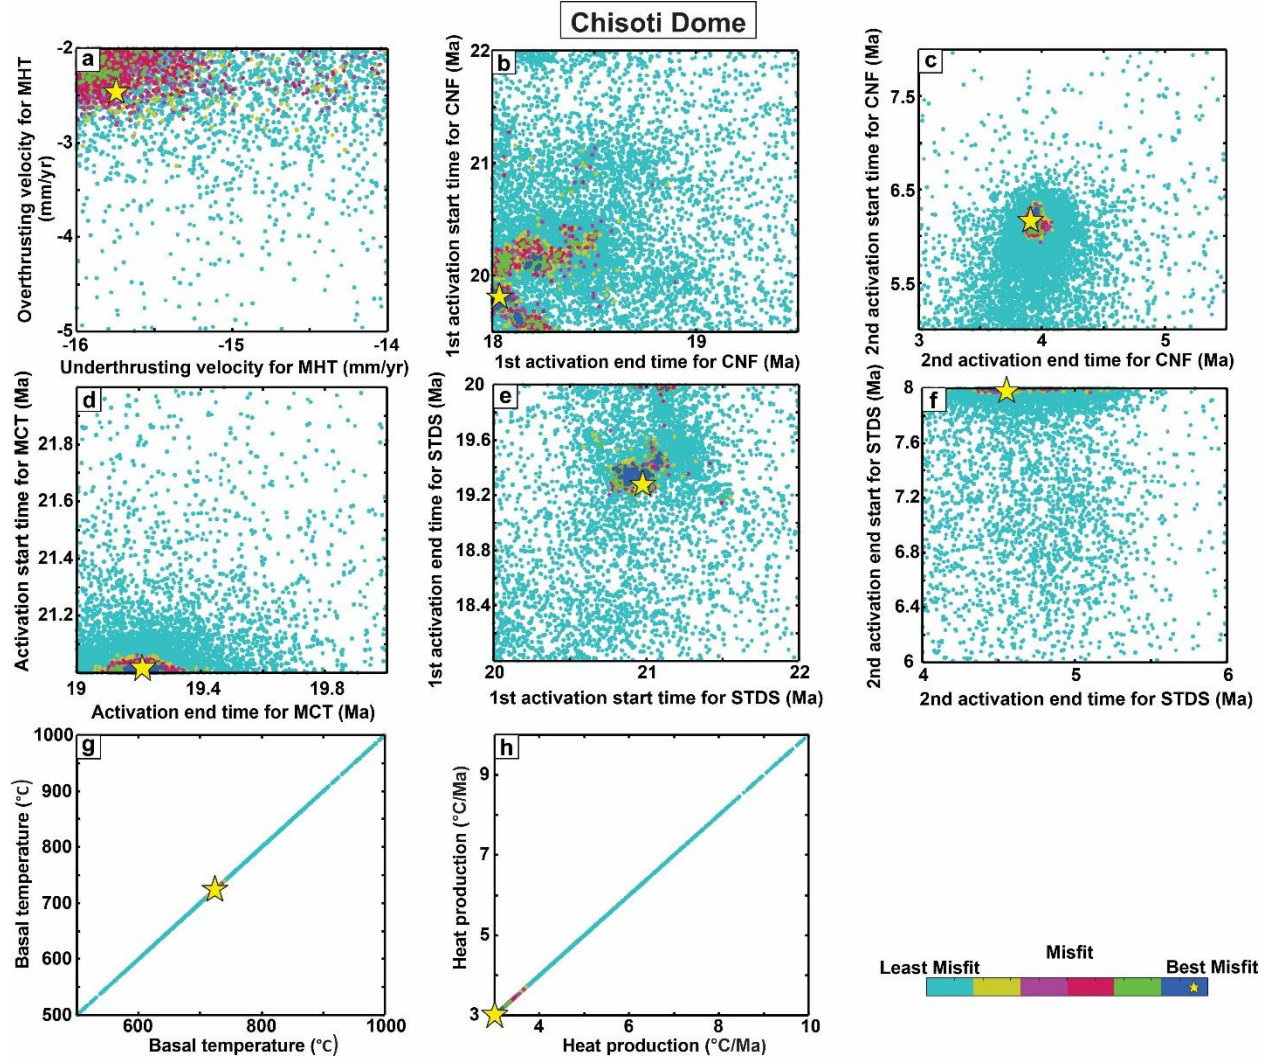

**Fig. S13**

**Fig. S13:** Figures a-h show the results of inverse model plots for different parameters for the Chisoti Dome, where the yellow star mark represents the best fit.

### 2.3.4 Changgo-Malashan Dome

A 3D model for the Changgo Dome and Malashan Dome, which is located in South Central

Tibet, was simulated for two tectonic scenarios since 22 Ma has a model thickness of 60 km and utilizes three type of cooling ages, AFT, MAr and BAr, where Richard Ketcham Routine was employed to construct the 3D model, where isostasy and shear heating parameters were not considered (Herman et al., 2010). To simulate the Model, we employed three fault data, MHT, MCT, and STDS, which were obtained (Acton et al., 2011; Grujic et al., 2011; Lee et al., 2000; Mitra et al., 2005; Warren et al., 2011; Zhao et al., 1993). Among three faults, MHT was modeled as an active thrust fault during the period from 22 million years ago to the present day, while STDS was recognized as a normal fault during two distinct time steps: from 17.43 to 17.41 million years ago and from 16.85 to 13.84 million years ago. The MCT is considered a thrust fault from 21-20 Ma. The result of the forward model, consisting of the best RMS misfit, is 2.027 Ma (supplementary Fig. S14, S15(a-d)). The Pecube was used to predict the age of brittle deformation, and inverse modeling (neighborhood algorithm using Pecube) was utilized to determine the activation time for this dome, which has ranges and misfits, as given in supplementary Table S4 and inverse result displayed in supplementary Fig. S16 (a-d).

**The table below shows the number of model scenario tests to constrain the best RMS misfit.**

| Dome Names                 | Faults                                     | Fault Parameters Used                                           | RMS Misfit (Ma)                           | RMS Total Misfit (Ma)                 |
|----------------------------|--------------------------------------------|-----------------------------------------------------------------|-------------------------------------------|---------------------------------------|
| Changgo and Malashan Domes | Model Scenario 1                           | MHT (22Ma-0Ma)<br>STDS (17.43 Ma-17.41 Ma, 16.85 Ma – 13.87 Ma) | ZFT = 1.804<br>MAr = 2.002<br>BAr = 2.363 | 2.027<br><br><b>Most Viable Model</b> |
|                            | Model Scenario 2<br>(STDS active one time) | MHT (22Ma-0Ma)<br>STDS (17.43 Ma-17.41 Ma)                      | ZFT = 2.393<br>MAr = 1.946<br>BAr = 2.02  | 2.121                                 |
|                            | Model Scenario 3                           | MHT (22Ma-0Ma)                                                  | ZFT = 1.760<br>MAr = 2.03                 | 2.233                                 |

|  |                                   |                                                                    |                                            |       |
|--|-----------------------------------|--------------------------------------------------------------------|--------------------------------------------|-------|
|  | (With MCT)                        | STDS (17.43 Ma-17.41 Ma,<br>16.85 Ma – 13.87 Ma)<br>MCT (21-20 Ma) | BAr = 3.089                                |       |
|  | Model Scenario 4<br>(Without MHT) | STDS (17.43 Ma-17.41 Ma,<br>16.85 Ma – 13.87 Ma)<br>MCT (21-20 Ma) | ZFT = 3.102<br>MAr = 2.019<br>BAr = 3.0132 | 2.659 |

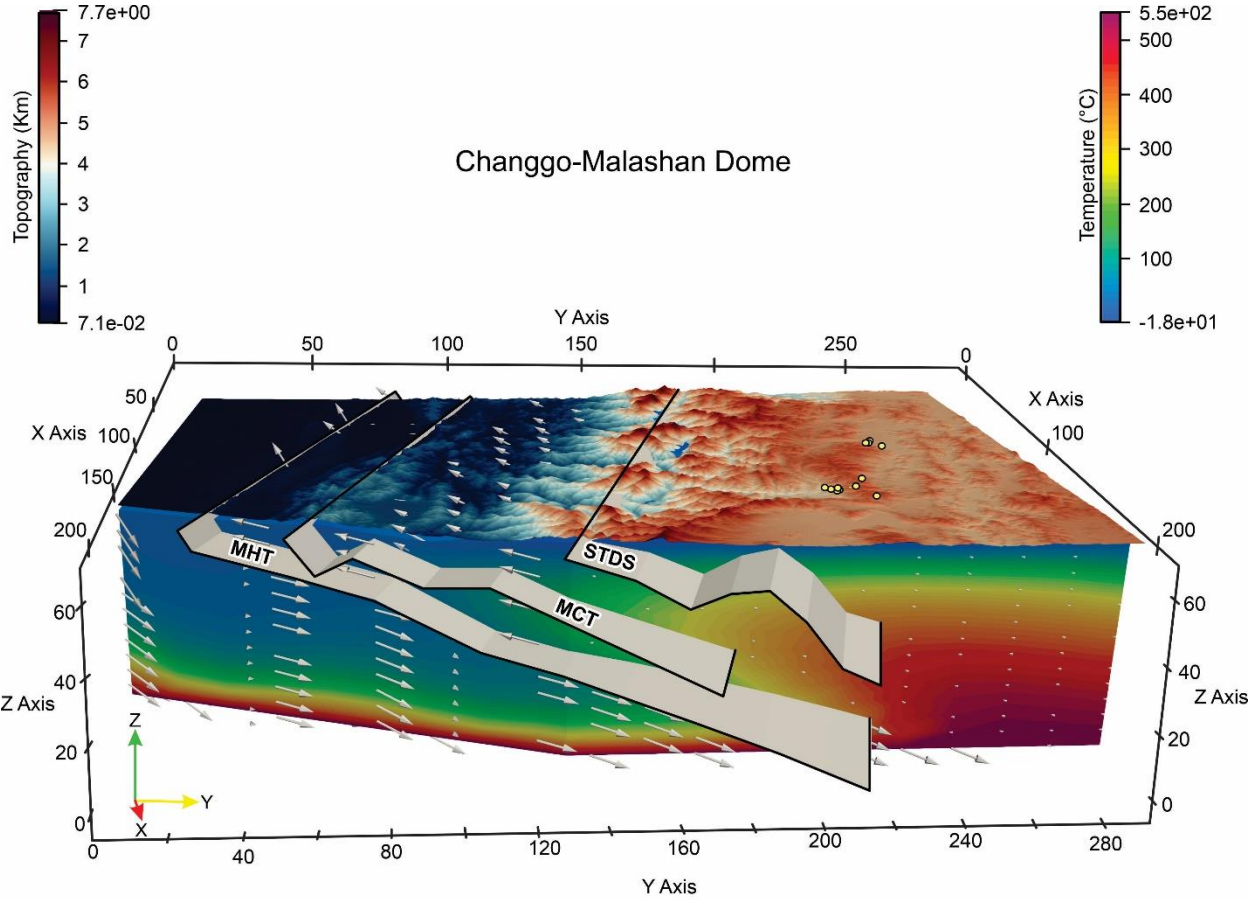

**Fig. S14**

**Fig. S14:** The Figure shows the 3D model for the Changgo-Malashan Dome, where isotherms and velocity vectors demonstrated in the cross-sections are constrained after employing the Pecube Forward model.

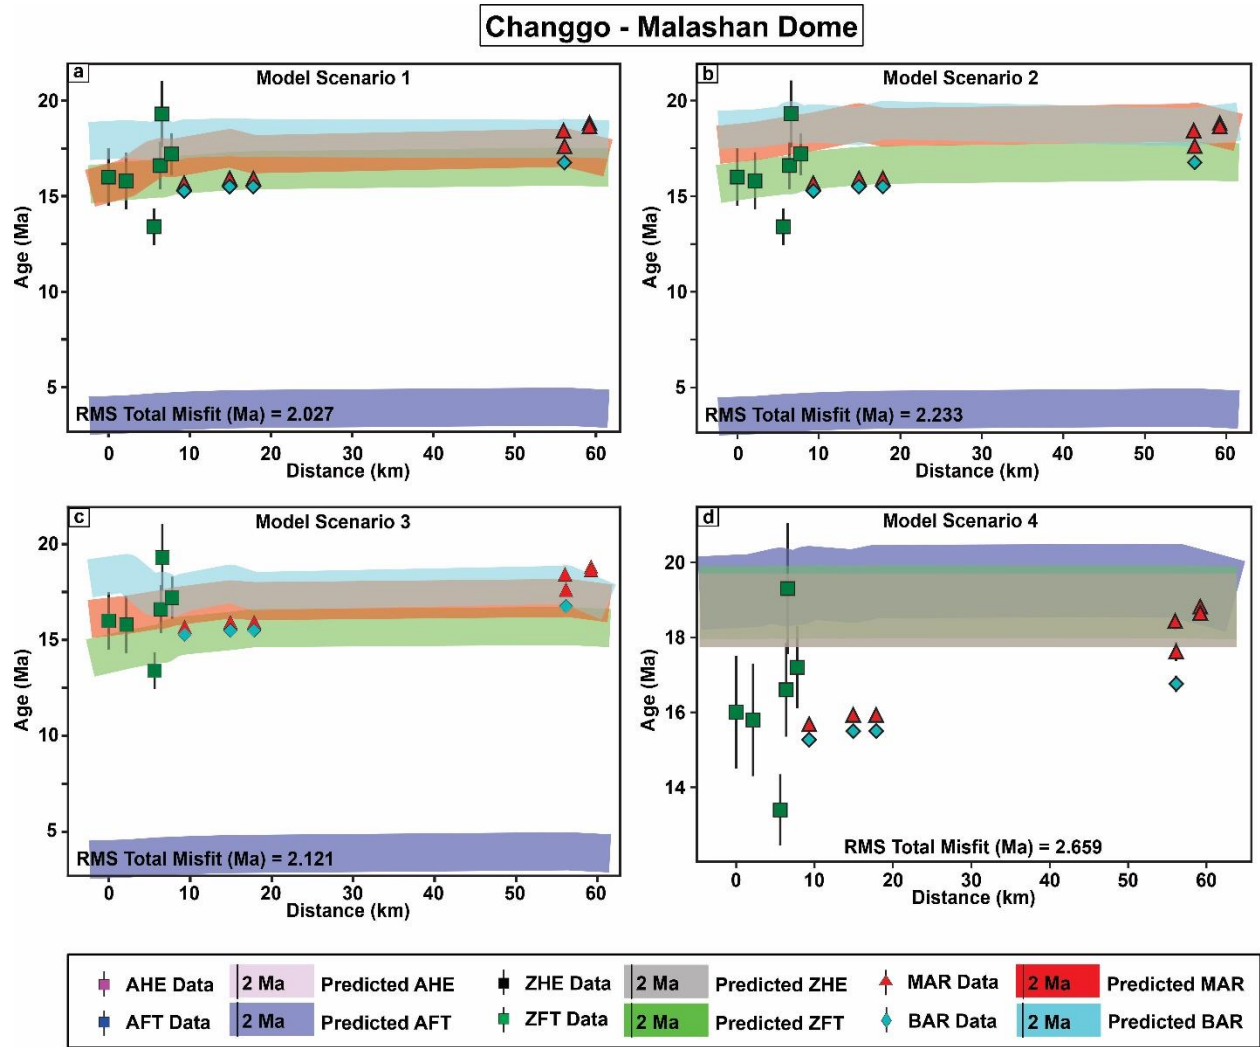

Fig. S15

**Fig. S15:** Figures a-d illustrate the age distance plot for the observed and predicted for Changgo-Malashan Dome in the Himalaya after Pecube forward models.

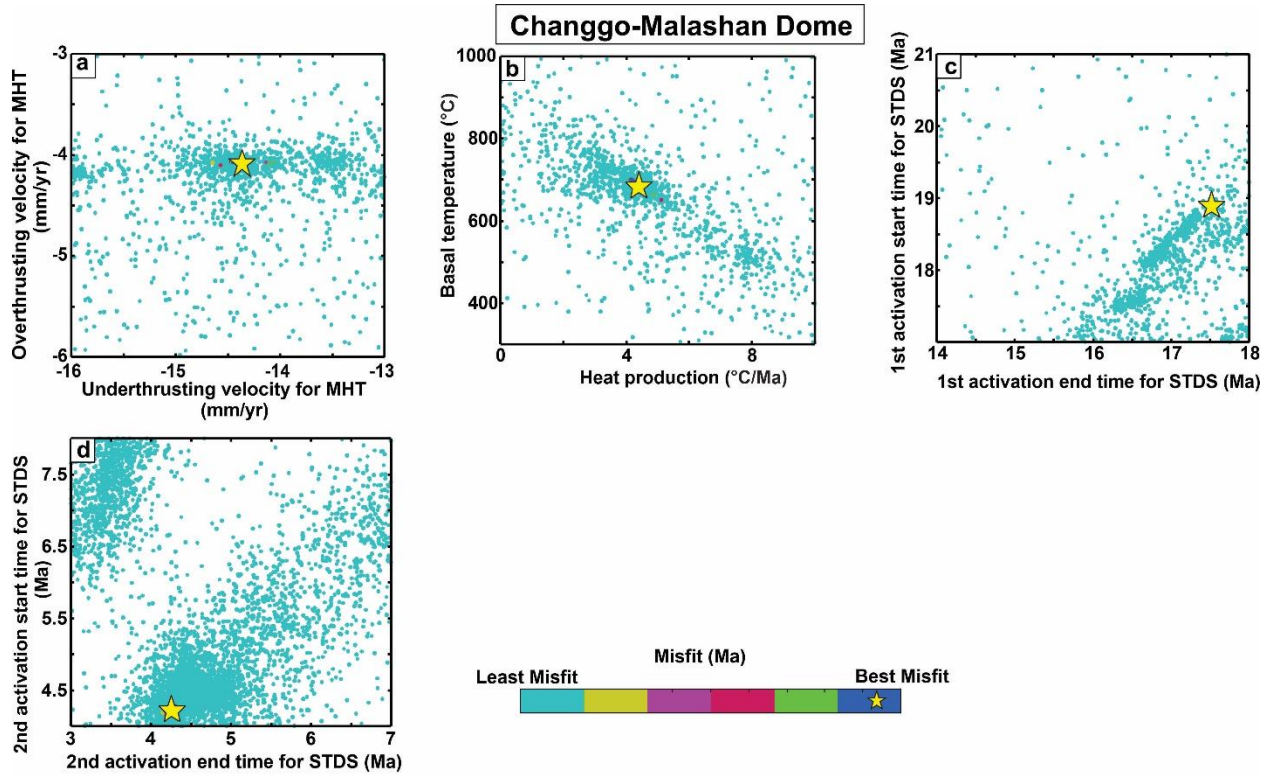

**Fig. S16**

**Fig. S16:** Figures a-d show the results of inverse model plots for different parameters for the Changgo-Malashan Dome, where the yellow star mark represents the best fit.

### 2.3.5 Mabja Dome

A 3D model of the Mabja dome was generated using a crustal thickness of 35 km, with dimensions of nx 4940 and ny 11838 for a two-time tectonic scenario modeled from 17 Ma to the present time because all cooling ages are younger than 17 Ma, where the shear heating, age elevation relationship, and isostasy parameters were not considered for modeling the Mabja dome. However, the Richards Ketcham Routine was used to model MBD and utilize three types of cooling ages: MAr, BAr, and AFT. The fault parameters used in this study were obtained from (Acton et al., 2011; Grujic et al., 2011; Lee et al., 2000; Mitra et al., 2005; Warren et al., 2011; Zhao et al., 1993), where three faults were considered: the MHT, MCT, and the STDS. The MHT was modeled

as a thrust fault and has been active since 17 Ma. On the other hand, the STDS was modeled as a normal fault and was active during two time steps: from 15 to 14 million years ago and from 6.5 to 6 million years ago (supplementary Fig. S17, S18a-d), while the MCT was active as a thrust fault from 21 to 20 Ma. To accurately determine the time of activation, an inverse model was used, and the resulting outcomes are presented in Supplementary Table S4, and the inverse result is displayed in [Supplementary Fig. S19 \(a-f\)](#).

**The table below shows the number of model scenario tests to constrain the best RMS misfit.**

| Dome Names | Faults                                     | Fault Parameters Used                                                 | RMS Misfit (Ma)                           | RMS Total Misfit (Ma)             |
|------------|--------------------------------------------|-----------------------------------------------------------------------|-------------------------------------------|-----------------------------------|
| Mabja Dome | Model Scenario 1<br>All faults             | MHT (17Ma-0Ma)<br>STDS (15 Ma-14 Ma, 6.5 Ma – 6 Ma)<br>MCT (21-20 Ma) | AFT = 2.725<br>MAr = 1.80<br>BAr = 2.243  | 2.206<br><b>Most Viable Model</b> |
|            | Model Scenario 2<br>(STDS active one time) | MHT (17Ma-0Ma)<br><b>STDS (15 Ma-14 Ma)</b><br>MCT (21-20 Ma)         | AFT = 9.670<br>MAr = 4.879<br>BAr = 1.626 | 5.989                             |
|            | Model Scenario 3<br>(Without MCT)          | MHT (17Ma-0Ma)<br>STDS (15 Ma-14 Ma, 6.5 Ma – 6 Ma)                   | AFT = 2.725<br>MAr = 1.805<br>BAr = 2.243 | 2.206                             |
|            | Model Scenario 4<br>(Without MHT)          | STDS (15 Ma-14 Ma, 6.5 Ma – 6 Ma)<br>MCT (21-20 Ma)                   | AFT = 8.318<br>MAr = 2.757<br>BAr = 2.463 | 4.558                             |

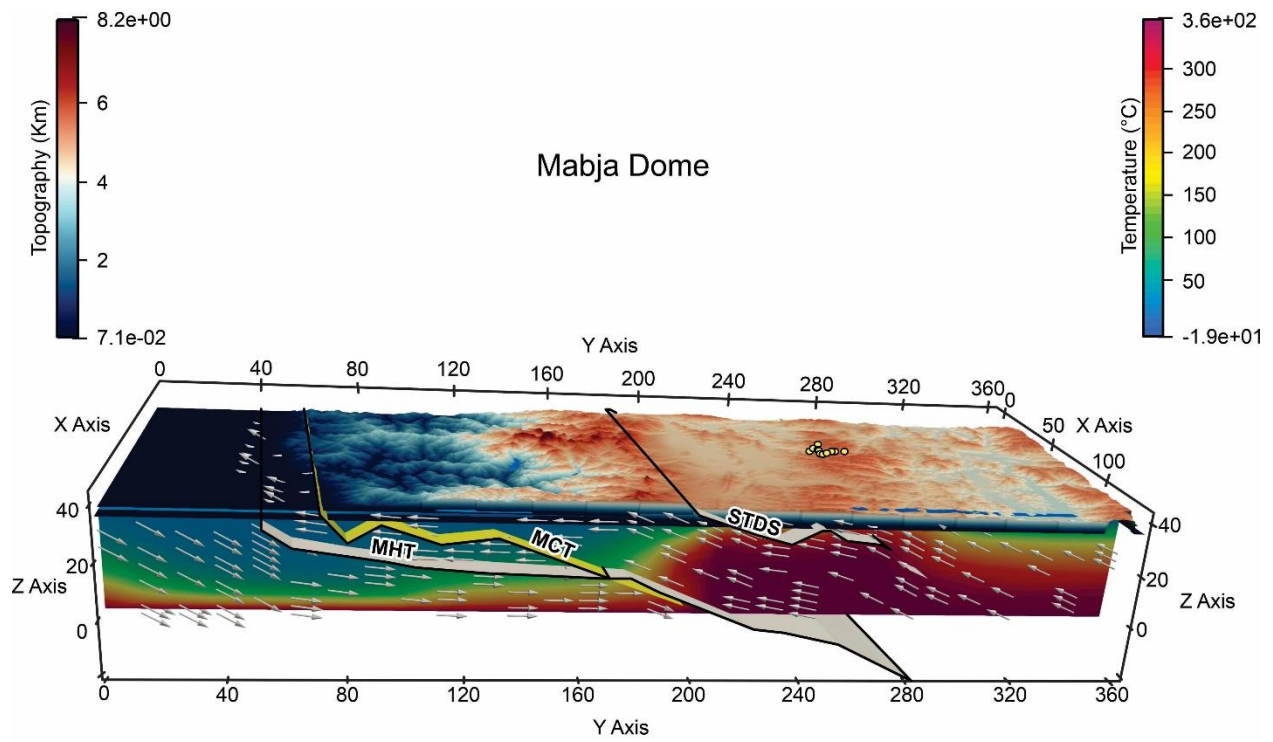

**Fig. S17**

**Fig. S17:** The Figure shows the 3D model for the Mabja Dome, where isotherms and velocity vectors demonstrated in the cross-sections are constrained after employing the Pecube Forward model.

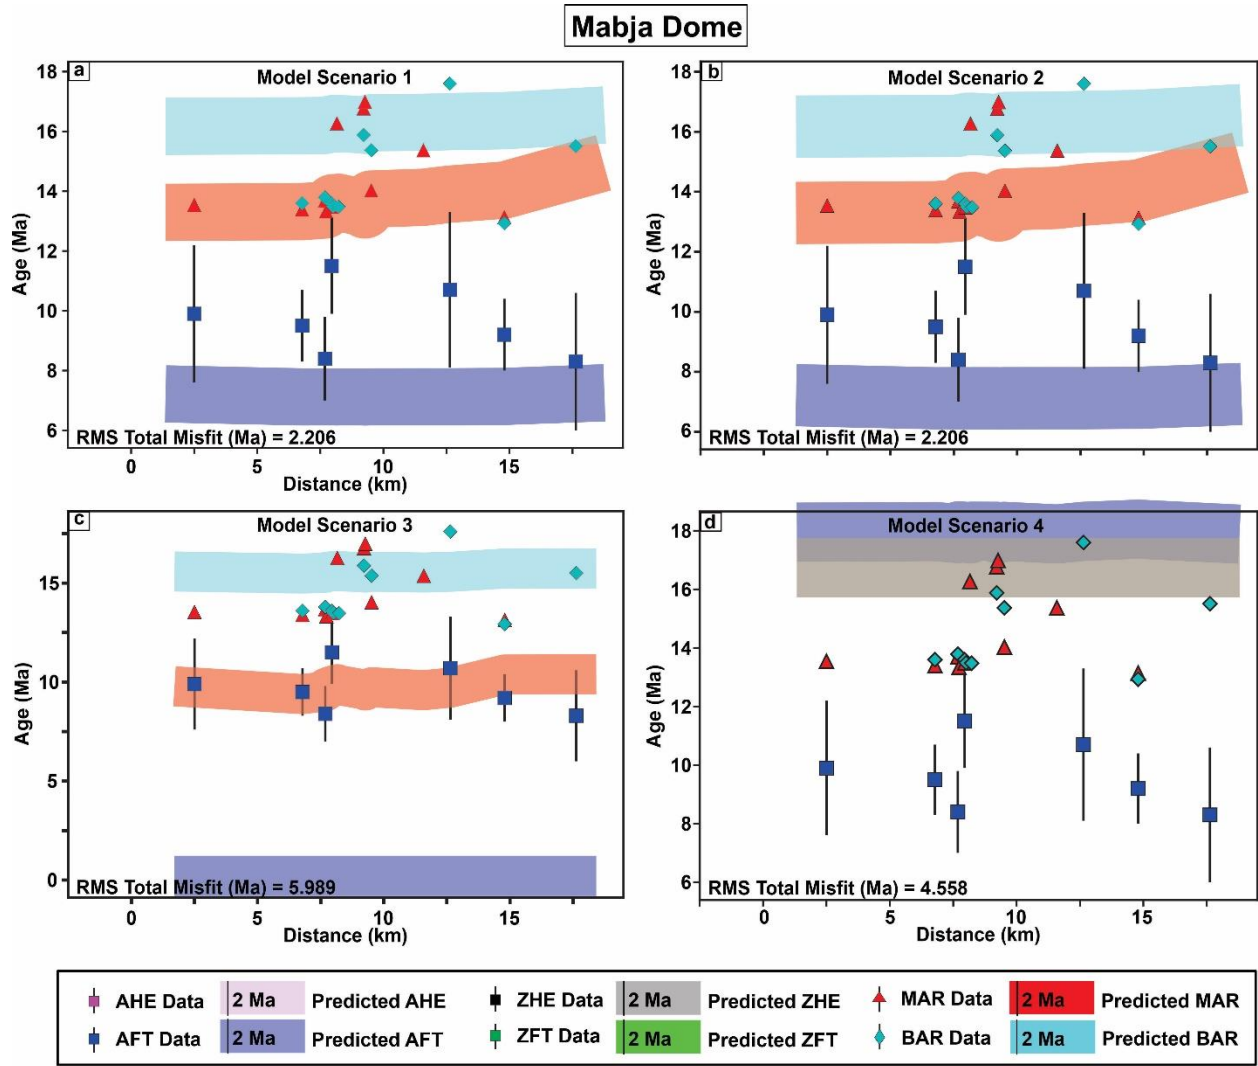

Fig. S18

**Fig. S18:** Figures a-d illustrate the age distance plot for the observed and predicted for Mabja Dome in the Himalaya after Pecube forward models.

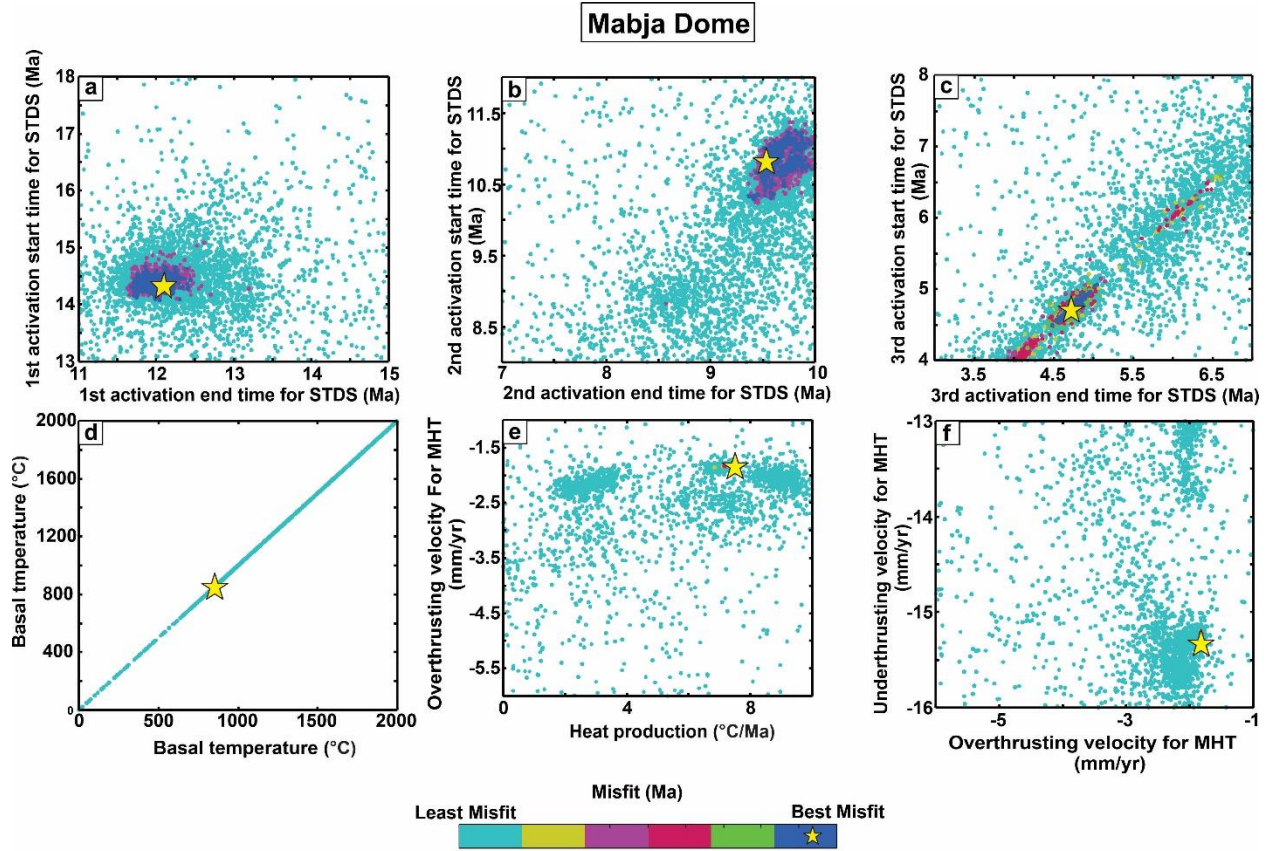

**Fig. S19**

**Fig. S19:** Figures a-f show the results of inverse model plots for different parameters for the Mabja Dome, where the yellow star mark represents the best fit.

### 2.3.6 Kampa Dome

A 3D model for Kampa Dome is simulated using a basal thickness of 57 km, and dimensions of  $n_x$  is 4940, and  $n_y$  is 11838 for the two-time scenario from 16 to 0 Ma, with all parameters given in [Supplementary Table S3](#). In this model, we did not incorporate the age elevation relation, isostasy, or shear heating, and in contrast, three fault data obtained (Acton et al., 2011; Mitra et al., 2005; Lee et al., 2000; Grujic et al., 2011; Warren et al., 2011; Zhao et al., 1993) and employed to simulate the model by incorporating two types of thermochronological ages: MAr and BAR ages, while the model mainly used three faults, MHT, MCT and STDS, where MHT was considered as

a thrust fault that remained active from 16 Ma to present, and STDS was modeled as a normal fault between 15 to 14 Ma, and MCT was modeled as a thrust fault between the 21 to 20 Ma. To determine the precise activation time in the brittle stage, the parameters were set within a range after seeing the predicted ages in the forward model. To determine the activation time in the brittle stage, predicted AFT and ZFT ages given by Pecube were used, while the forward model has the best RMS misfit result of 1.133 Ma. After forward modeling (supplementary Fig. S20, S21a-c), we did the inverse modeling using the neighborhood algorithm using Pecube, which has ranges and best fits, as given in supplementary Table S4 and inverse result displayed in Supplementary Fig. S22 (a-d).

The table below shows the number of model scenario tests to constrain the best RMS misfit.

| Dome Names | Faults                            | Fault Parameters Used                                  | RMS Misfit (Ma)            | RMS Total Misfit (Ma)             |
|------------|-----------------------------------|--------------------------------------------------------|----------------------------|-----------------------------------|
| Kampa Dome | Model Scenario 1<br>(Without MCT) | MHT (17Ma-0Ma)<br>STDS (15 Ma-14 Ma)                   | MAr = 0.605<br>BAr = 1.238 | 1.133<br><b>Most Viable Model</b> |
|            | Model Scenario 2                  | MHT (17Ma-0Ma)<br>STDS (15 Ma-14 Ma)<br>MCT (21-20 Ma) | MAr = 2.025<br>BAr = 1.377 | 1.703                             |
|            | Model Scenario 3<br>(Without MHT) | STDS (15 Ma-14 Ma, 6.5 Ma – 6 Ma)<br>MCT (21-20 Ma)    | MAr = 2.406<br>BAr = 1.401 | 1.721                             |

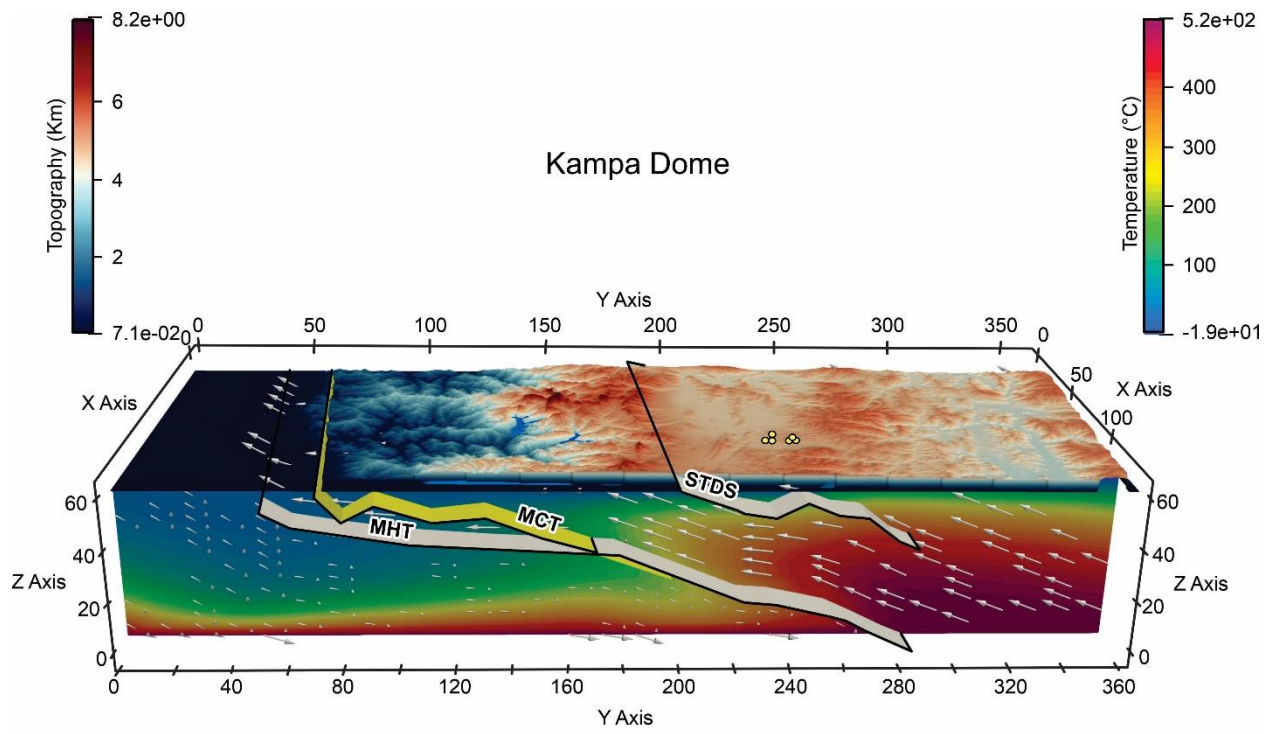

**Fig. S20**

**Fig. S20:** The Figure shows the 3D model for the Kampa Dome, where isotherms and velocity vectors demonstrated in the cross-sections are constrained after employing the Pecube Forward model.

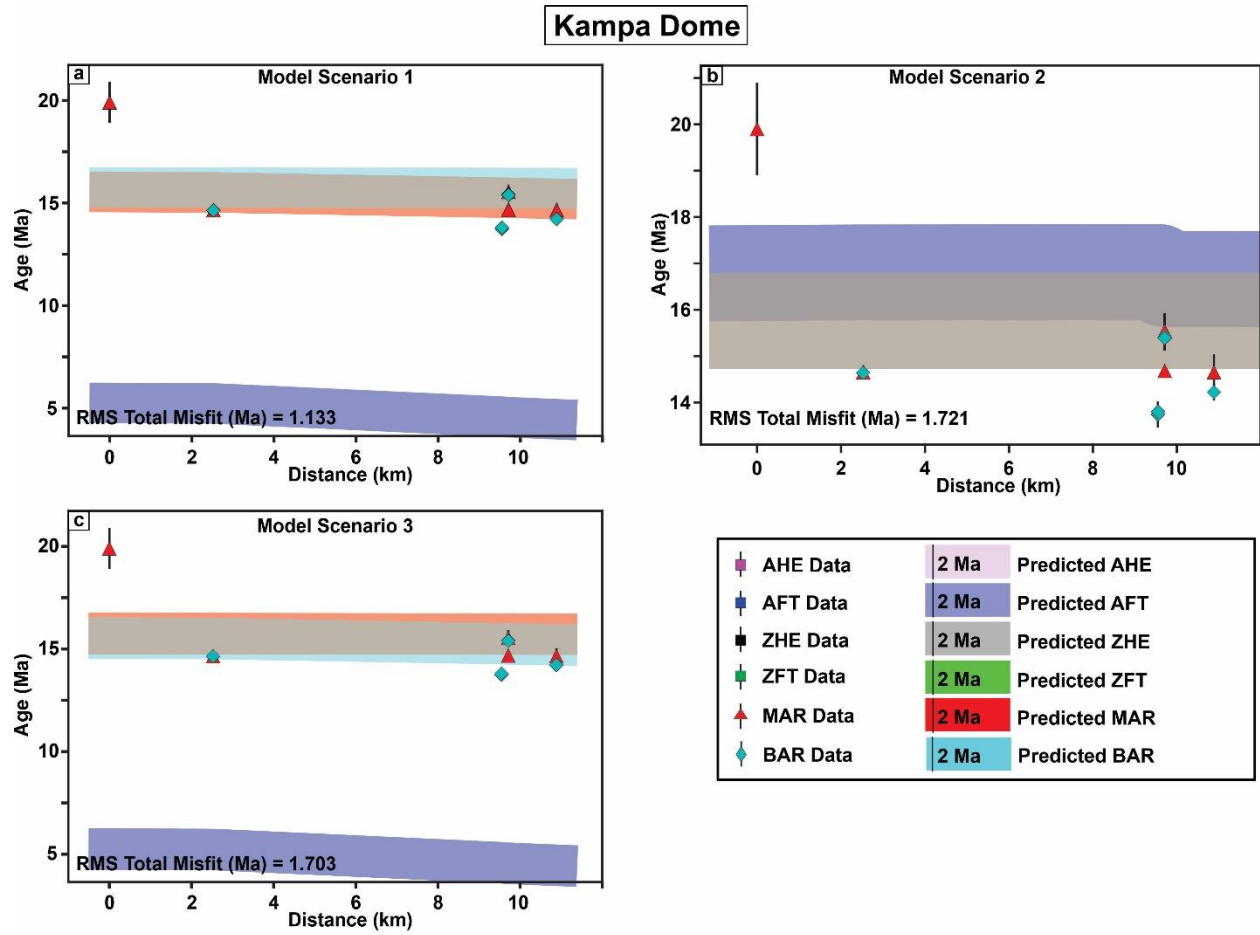

Fig. S21

**Fig. S21:** Figures a-c illustrates the age distance plot for the observed and predicted for Kampa Dome in the Himalaya after Pecube forward models.

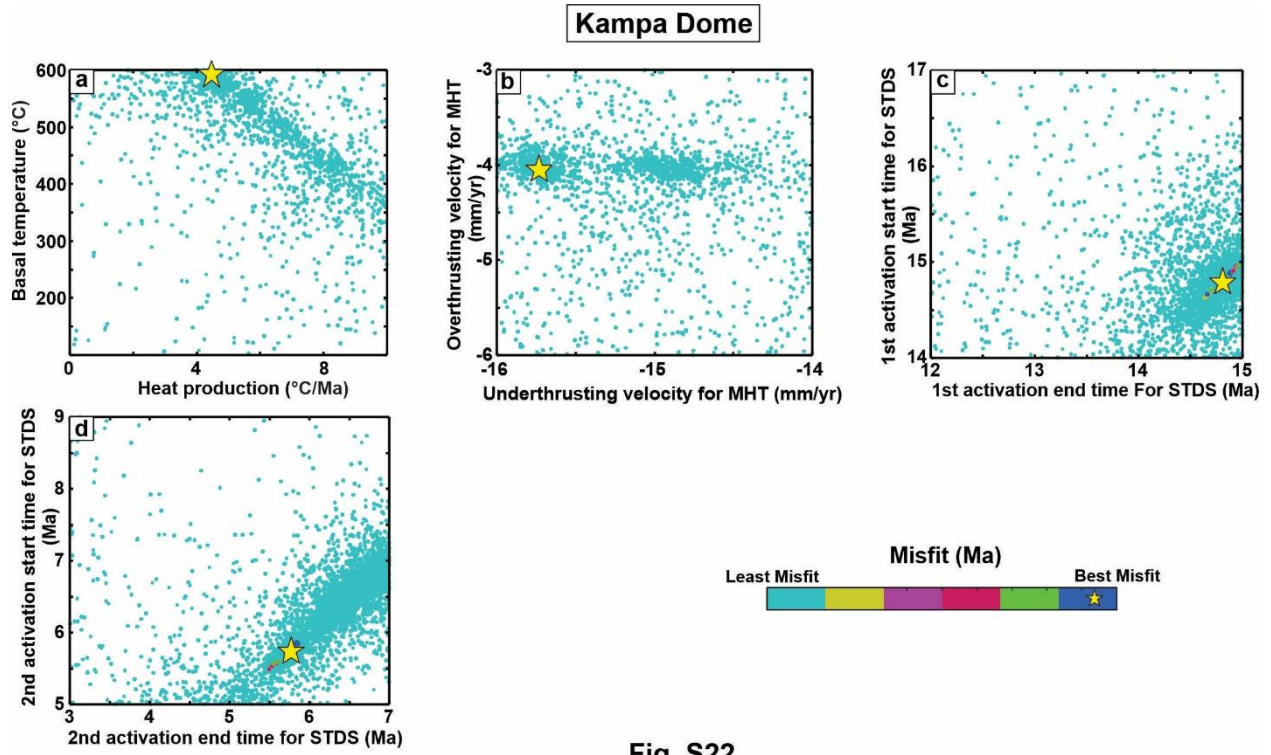

**Fig. S22**

**Fig. S22:** Figures a-d show the results of inverse model plots for different parameters for the Kampa Dome, where the yellow star mark represents the best fit.

### 2.3.7 Kamgmar Dome

The 3D model of Kangmar domes was created using the 57 km Basal thickness and consists of dimensions having nx is 2481 and ny 11528, where a two-time tectonomorphic situation was taken for the modeling of this dome from 17.4 to 0 Ma. Where, we used the five thermochronological data known as MAr, BAr, AFT, ZFT, and ZHe ages. In contrast, age elevation, shear heating, and isostasy were not taken for the model, and three faults were used, obtained from [Acton et al., 2011](#); [Mitra et al., 2005](#); [Lee et al., 2000](#); [Grujic et al., 2011](#); [Warren et al., 2011](#) and [Zhao et al., 1993](#). Among these three faults, one is the MHT modeled as a thrust fault active from 17.4 to the present day, another fault is the STDS modeled as a normal fault active in two-time steps, where the first step was from 12.35 to 12.34 Ma, and the second step was taken from 7.3 to 3 Ma,

while MCT modeled as a thrust fault active from 21-20 Ma. As a result, the model comprising the best RMS misfit is 2.544 Ma, and all those remaining parameters are discussed in the supplementary table S3. After forward modeling (supplementary Fig. S23, S24), we did the inverse modeling using the neighborhood algorithm using Pecube, which has ranges and best fits, as given in supplementary Table S4, and the inverse result is displayed in supplementary Fig. S25.

**The table below shows the number of model scenario tests to constrain the best RMS misfit.**

| Dome Names   | Faults                                     | Fault Parameters Used                                                           | RMS Misfit (Ma)                                                         | RMS Total Misfit (Ma)                 |
|--------------|--------------------------------------------|---------------------------------------------------------------------------------|-------------------------------------------------------------------------|---------------------------------------|
| Kangmar Dome | Model Scenario 1<br>(Without MCT)          | MHT (17.4 Ma-0 Ma)<br>STDS (12.35 Ma-12.34 Ma, 7.3 Ma – 3 Ma)                   | AFT = 2.313<br>ZHe = 1.674<br>ZFT = 2.275<br>MAr = 1.997<br>BAr = 3.591 | 2.544<br><br><b>Most Viable Model</b> |
|              | Model Scenario 2                           | MHT (17.4 Ma-0 Ma)<br>STDS (12.35 Ma-12.34 Ma, 7.3 Ma – 3 Ma)<br>MCT (21-20 Ma) | AFT = 2.313<br>ZHe = 1.705<br>ZFT = 1.674<br>MAr = 2.08<br>BAr = 3.616  | 2.561                                 |
|              | Model Scenario 3<br>(STDS active one time) | MHT (17.4 Ma-0 Ma)<br>STDS (12.35 Ma-12.34 Ma)<br>MCT (21-20 Ma)                | AFT = 2.946<br>ZHe = 4.839<br>ZFT = 8.101<br>MAr = 2.359<br>BAr = 2.909 | 3.975                                 |
|              | Model Scenario 4<br>(Without MHT)          | STDS (12.35 Ma-12.34 Ma, 7.3 Ma – 3 Ma)<br>MCT (21-20 Ma)                       | AFT = 1.535<br>ZHe = 7.297<br>ZFT = 2.017<br>MAr = 3.214<br>BAr = 3.777 | 3.54                                  |

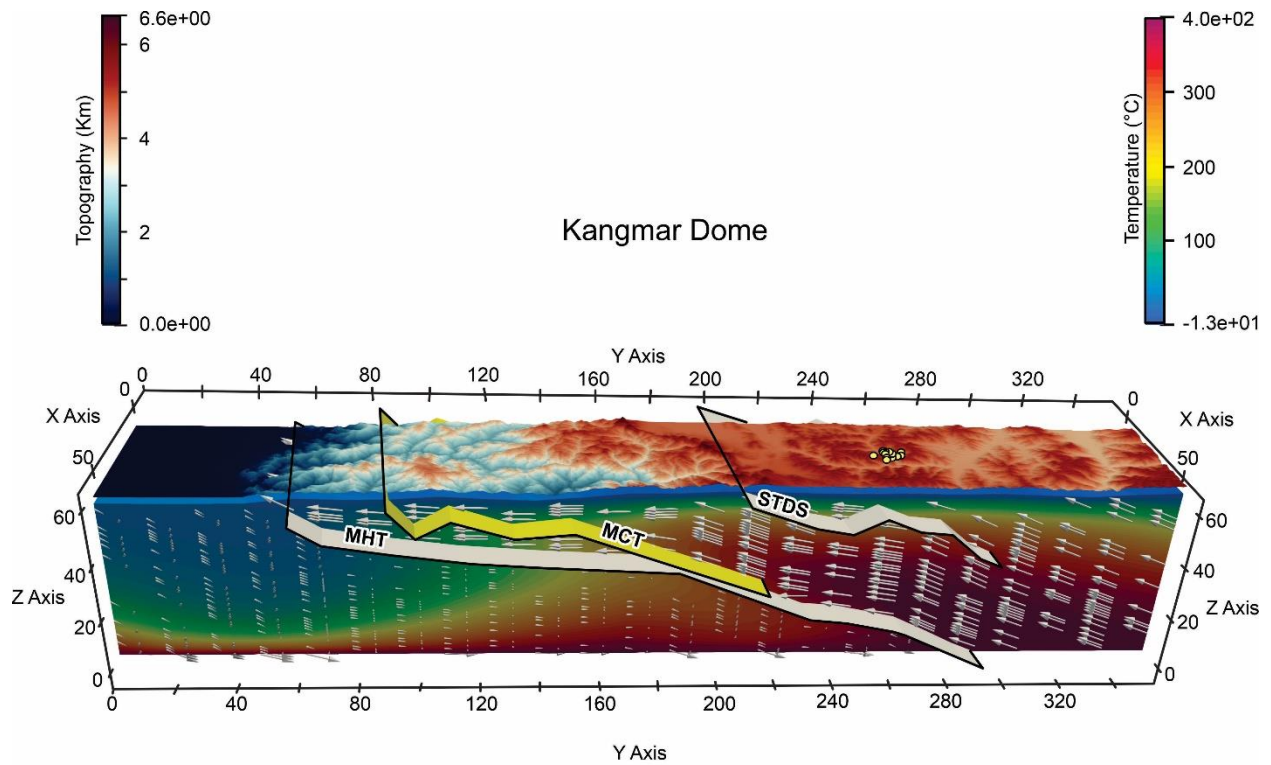

**Fig. S23**

**Fig. S23:** The Figure shows the 3D model for the Kangmar Dome, where isotherms and velocity vectors demonstrated in the cross-sections are constrained after employing the Pecube Forward model.

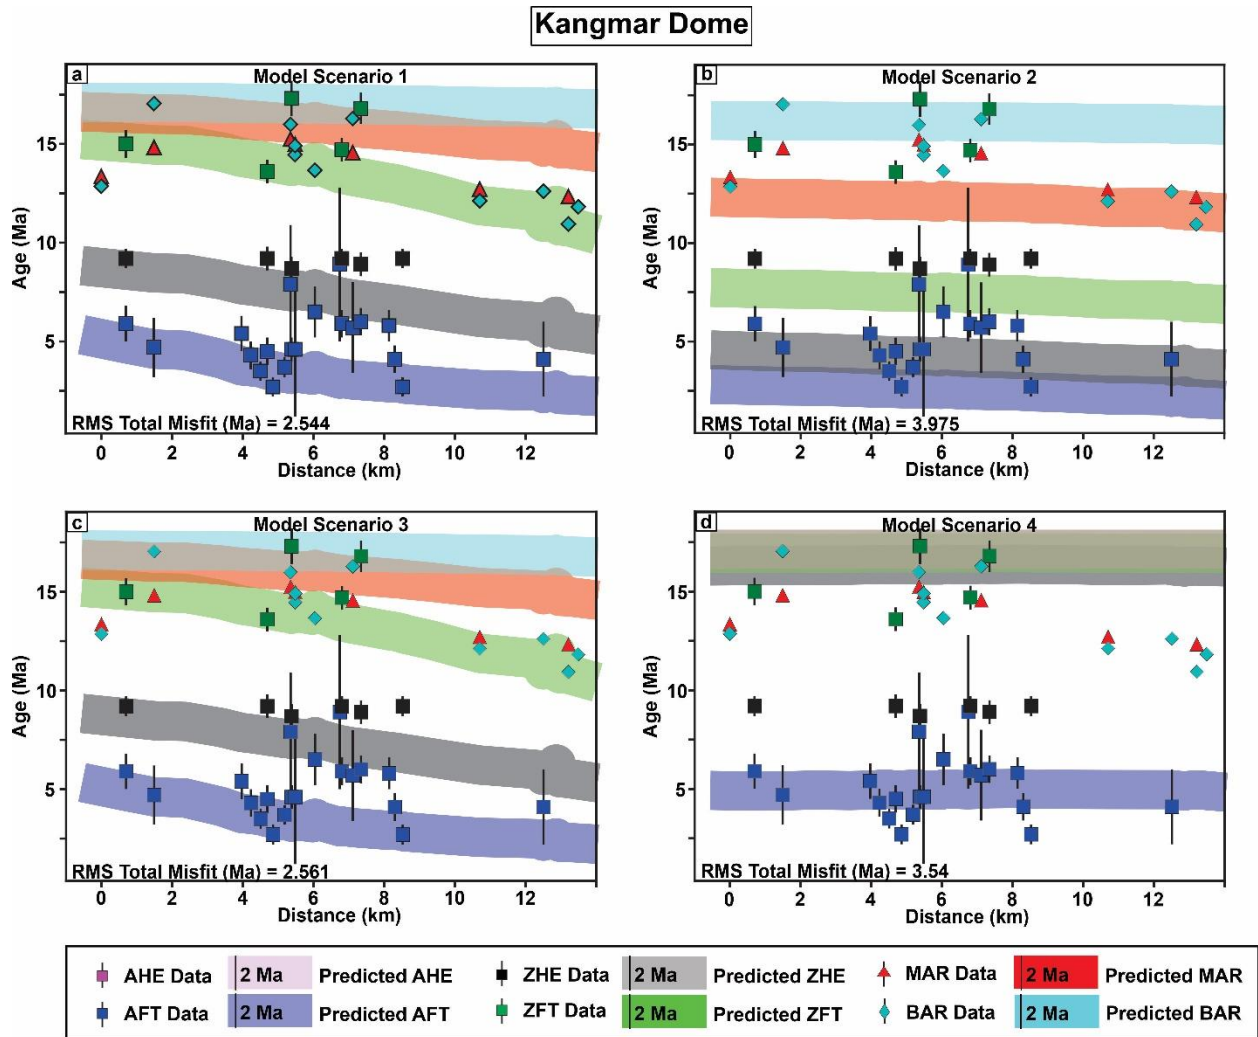

Fig. S24

**Fig. S24:** Figures a-d illustrate the age distance plot for the observed and predicted for Kangmar Dome in the Himalaya after Pecube forward models.

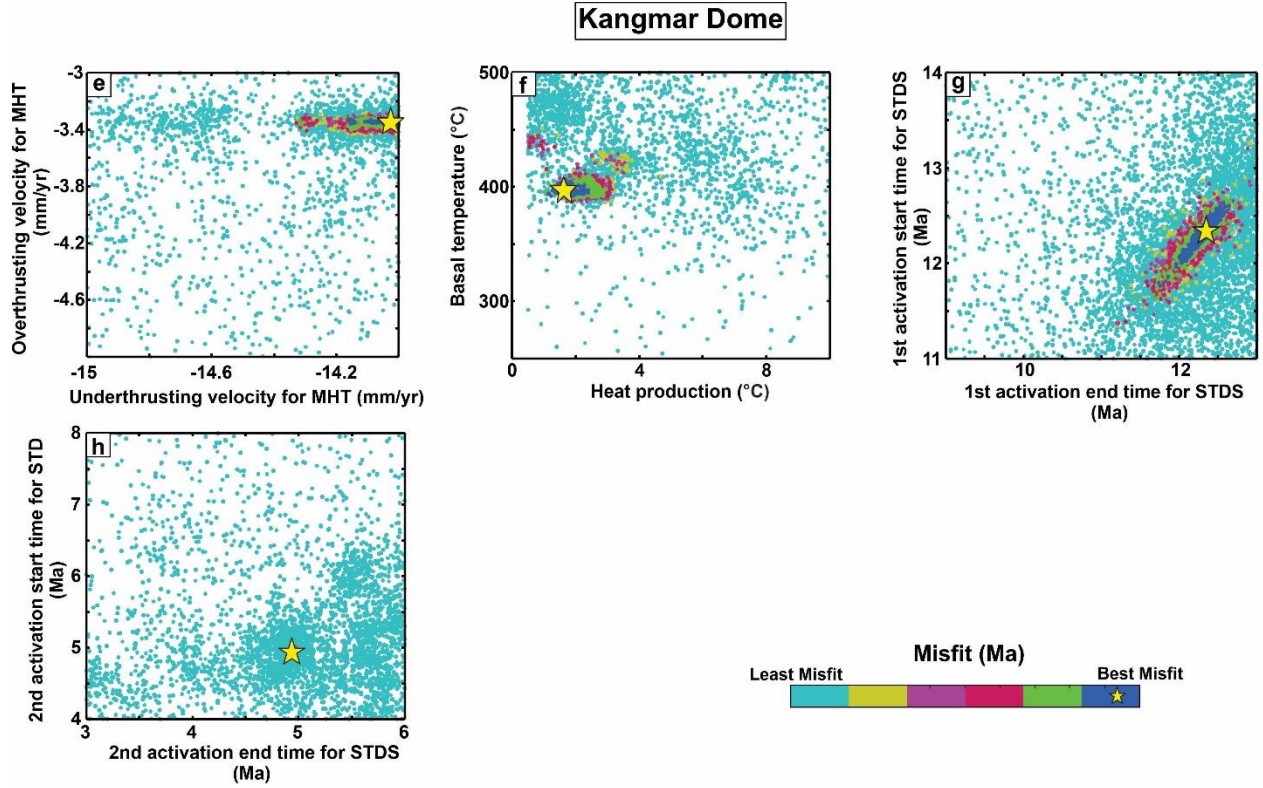

**Fig. S25**

**Fig. S25:** Figures a-h show the results of inverse model plots for different parameters for the Kangmar Dome, where the yellow star mark represents the best fit.

### 3. Normalized Channel Steepness Index (Ksn)

The normalized channel steepness index (Ksn) represents the ratio of the stream channel gradient to the drainage area (Kirby & Whipple, 2012), expressed by the formula:

$$S = k_{sn} A^{-\theta}$$

Where S is the channel slope, A is the drainage area in upstream, Ksn is the normalized channel steepness, and  $\theta$  is the concavity index (Hack, 1957), whereas the  $\theta$  is the ratio of two constant m and n depends on the hydrology of the basin, incision process and geometry of the channel (Mudd et al., 2018). We did the Ksn analysis within the gneissic doming region that is situated in the lithologically similar area on a regional scale by using normal  $\theta$  is 0.45 (Clubb et al., 2023) to

examine the fluvial response to tectonic forcing because the rapid tectonic uplift causes rapid stream incision. The methodology employed the SRTM 30m digital elevation model (DEM: <https://opentopography.org/>) and utilized LSDTopoTool (Mudd et al., 2014). The Ksn values of the gneissic domes (See Supply Fig. S26) of the Himalaya are demonstrated below:

| Dome Name                                                            | Ksn Values Range |
|----------------------------------------------------------------------|------------------|
| Gianbul Dome                                                         | 0-501            |
| Chisoti Dome                                                         | 0-562            |
| Suru Dome                                                            | 0-400            |
| LeoPargil Dome                                                       | 0-522            |
| Changgo Dome                                                         | 0-2700           |
| North Himalayan Gneissic Dome (Kangmar Dome, Kampa Dome, Mabja Dome) | 0-382            |

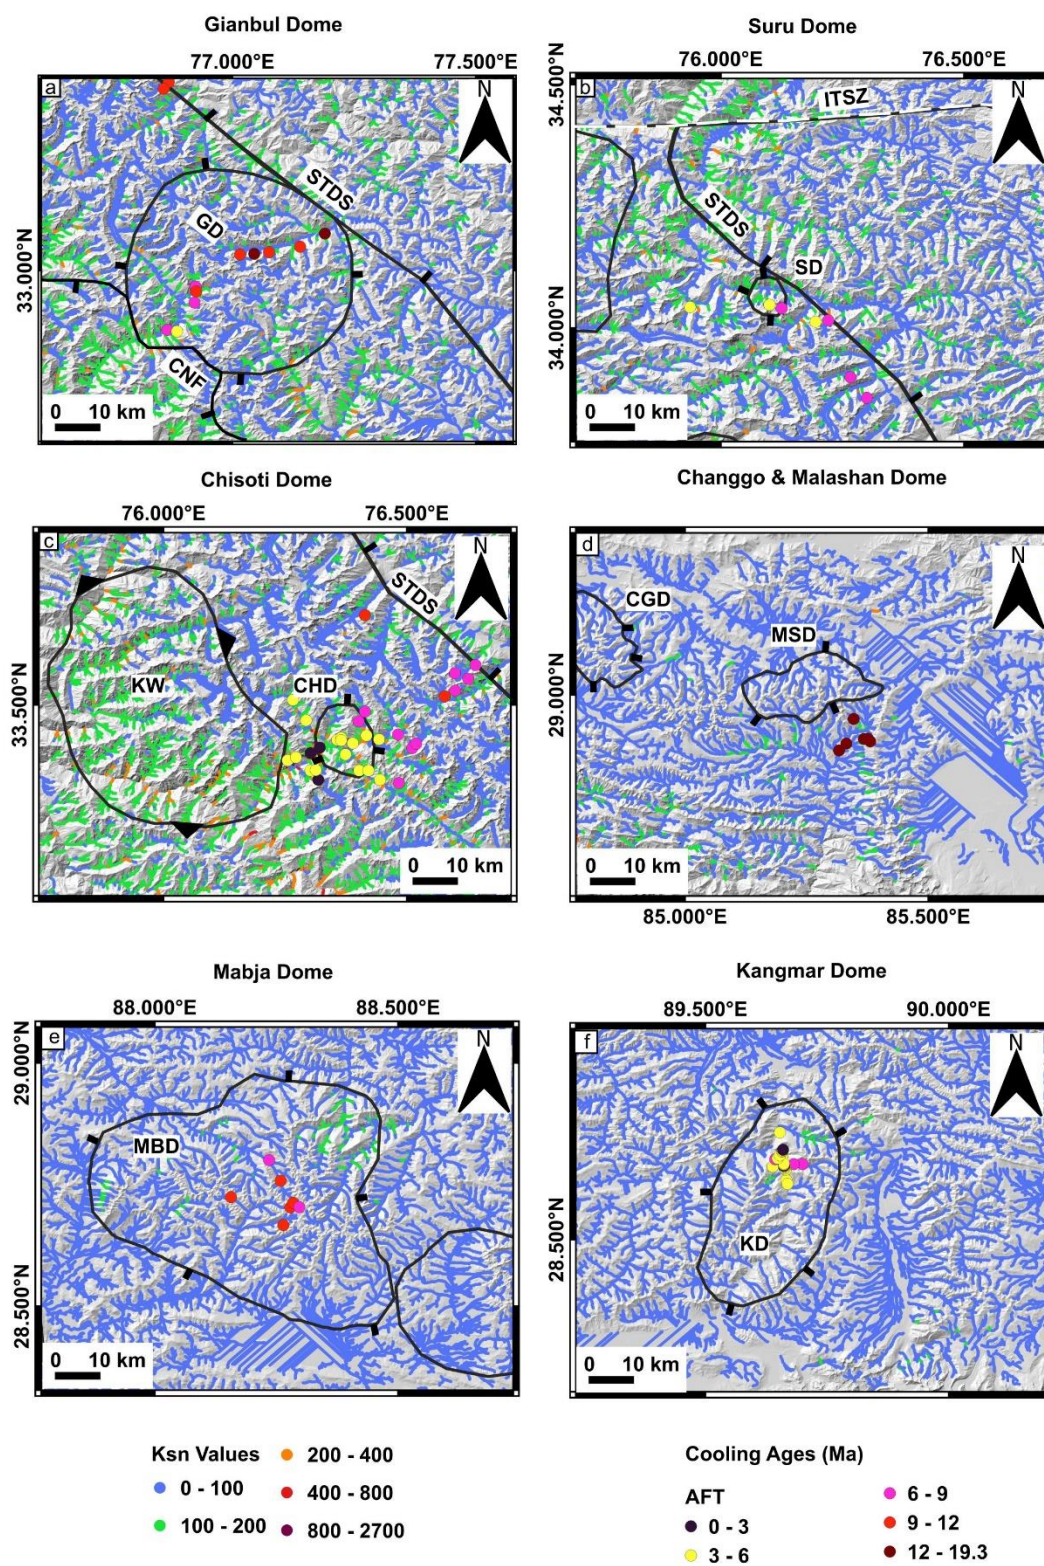

Fig. S26

**Fig. S26:** Figures a-f show the Ksn results with the youngest colling ages for the different gneissic domes of the Himalaya, where (a) Gianbul Dome, (b) Suru Dome, (c) Chisoti Dome, (d) Chaggo-Malashan Dome, (e) Mabja Dome, (f) Kangmar Dome.

#### 4. Gravity Disturbance

Gravity disturbance is solely a gravitational phenomenon that represents the difference between observed and referenced gravity ([Oliveira et al., 2018](#)).

$$\delta g_P = g_P - \gamma_P$$

In this equation,  $\delta g$  signifies the gravity disturbance,  $g$  refers to the measured gravity,  $\gamma$  indicates the normal gravity, and  $p$  denotes the specific observation point where the gravity measurement occurs. The measured gravity  $g$  is characterized as the magnitude of the gravitational acceleration, which is the spatial derivative of Earth's gravitational potential  $W$ , encompassing both the gravitational potential  $V$  (resulting from the attraction of Earth's mass) and the centrifugal potential  $\Phi$  attributable to Earth's rotation.

$$W = V + \Phi$$

The normal gravity  $\gamma$  is described as the derivative of the potential gravity field produced by the reference ellipsoid  $U$ , which is the cumulative effect of the gravitational field  $V_{ell}$  and the centrifugal potential  $\Phi$ :

$$V = V_{ell} + \Phi$$

Gravity disturbance is primarily utilized to identify geodynamic structures and to make inferences about the Earth's internal structure ([Hofmann-WellenhofMoritz, 2006](#)). The gravity disturbance

(Eigen-6C4) (<https://icgem.gfz-potsdam.de/home>) for the Himalaya is demonstrated in supplementary Fig. S27.

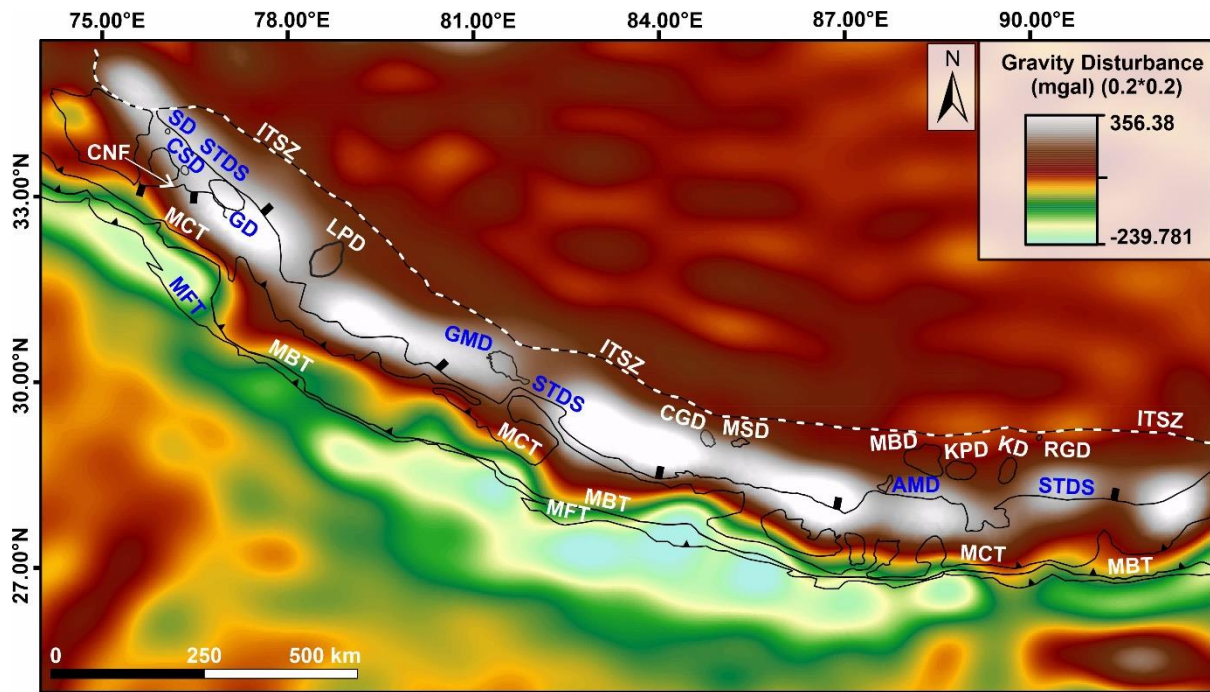

Fig. S27

**Fig. S27:** Gravity disturbance map of the Himalaya with location of the gneissic dome illustrates the gravity disturbed area.

**Table S1a: Compiled cooling ages from different gneissic dome in the Himalaya.**

| Sl No. | Sample No. | Longitude | Lattitude | Elevation (m) | AHE | DAHE | AFT | DAFT | ZHE | DZHE | ZFT  | DZFT | MAR  | DMAR | BAR  | DBAR | References and Domes Name                             |
|--------|------------|-----------|-----------|---------------|-----|------|-----|------|-----|------|------|------|------|------|------|------|-------------------------------------------------------|
| 1.     | GBD-5c     | 76.90175  | 32.93034  | 3882          |     |      |     |      |     |      |      |      | 20.7 | 0.1  | 21.3 | 0.2  | Gianbul Dome<br>Horton et al., 2015<br>And This Study |
| 2.     | GBD-15     | 76.90836  | 32.94436  | 4084          |     |      |     |      |     |      |      |      | 20.7 | 0.2  |      |      |                                                       |
| 3.     | GBD-26c    | 76.88536  | 32.95797  | 4109          |     |      |     |      |     |      |      |      | 20.7 | 0.1  | 21.4 | 0.2  |                                                       |
| 4.     | GBD-29b    | 76.88853  | 32.96137  | 4263          |     |      |     |      |     |      |      |      | 20.7 | 0.2  |      |      |                                                       |
| 5.     | GBD-33     | 76.91902  | 32.98282  | 4292          |     |      |     |      |     |      |      |      |      |      | 22   | 0.2  |                                                       |
| 6.     | GBD-34     | 76.9197   | 32.9813   | 4283          |     |      |     |      |     |      |      |      |      |      | 23   | 0.2  |                                                       |
| 7.     | GBD-36b    | 76.91834  | 32.9747   | 4379          |     |      |     |      |     |      |      |      | 20.8 | 0.1  | 22.6 | 0.2  |                                                       |
| 8.     | GBD-38     | 76.91959  | 32.96735  | 4322          |     |      |     |      |     |      |      |      | 21.1 | 0.2  |      |      |                                                       |
| 9.     | GBD-45b    | 76.89998  | 32.90104  | 3832          |     |      |     |      |     |      |      |      |      |      | 21.8 | 0.1  |                                                       |
| 10.    | GBD- 51b   | 76.83001  | 32.86728  | 3471          |     |      |     |      |     |      |      |      |      |      | 25.9 | 0.2  |                                                       |
| 11.    | GBD-52b    | 76.83075  | 32.8673   | 3466          |     |      |     |      |     |      |      |      | 21.4 | 0.1  | 25.1 | 0.2  |                                                       |
| 12.    | GBD-57a    | 77.15437  | 33.07651  | 4321          |     |      |     |      |     |      |      |      | 20.2 | 0.2  | 20.4 | 0.1  |                                                       |
| 13.    | GBD-60b    | 77.15351  | 33.07519  | 4281          |     |      |     |      |     |      |      |      | 21.4 | 0.3  | 21.4 | 0.1  |                                                       |
| 14.    | GBD- 63b   | 77.11447  | 33.05773  | 4373          |     |      |     |      |     |      |      |      | 19.7 | 0.1  | 19.8 | 0.1  |                                                       |
| 15.    | GBD-64c    | 77.11371  | 33.05815  | 4403          |     |      |     |      |     |      |      |      | 19.8 | 0.2  | 19.6 | 0.2  |                                                       |
| 16.    | GBD- 64d   | 77.11371  | 33.05815  | 4399          |     |      |     |      |     |      |      |      | 20.1 | 0.2  | 19.9 | 0.2  |                                                       |
| 17.    | GBD-67a    | 77.11839  | 33.05863  | 4379          |     |      |     |      |     |      |      |      | 19.9 | 0.2  |      |      |                                                       |
| 18.    | GBD-79c    | 77.13253  | 33.06576  | 4370          |     |      |     |      |     |      |      |      | 20.4 | 0.2  | 22.7 | 0.2  |                                                       |
| 19.    | GBD-90b    | 77.09758  | 33.05584  | 4436          |     |      |     |      |     |      |      |      | 20.2 | 0.2  | 21.6 | 0.2  |                                                       |
| 20.    | GBD-100b   | 77.03239  | 33.04867  | 4484          |     |      |     |      |     |      |      |      | 21.1 | 0.2  | 20.9 | 0.2  |                                                       |
| 21.    | GBD-101b   | 77.02861  | 33.04776  | 4491          |     |      |     |      |     |      |      |      |      |      | 22.5 | 0.1  |                                                       |
| 22.    | GD-3       | 77.139    | 33.049    | 4642          |     |      | 9.9 | 0.8  |     |      | 15.4 | 0.7  |      |      |      |      |                                                       |

|     |        |          |          |      |  |  |           |      |  |  |      |     |  |  |  |  |  |
|-----|--------|----------|----------|------|--|--|-----------|------|--|--|------|-----|--|--|--|--|--|
| 23. | GD-6   | 77.0156  | 33.0328  | 5128 |  |  | 12        | 0.6  |  |  |      |     |  |  |  |  |  |
| 24. | GD-7   | 77.0447  | 33.0344  | 5005 |  |  | 14.2      | 1.2  |  |  | 22.8 | 2.2 |  |  |  |  |  |
| 25. | GD-8   | 77.0752  | 33.0379  | 4799 |  |  | 11.7      | 0.7  |  |  |      |     |  |  |  |  |  |
| 26. | GD-9   | 77.156   | 33.0595  | 4649 |  |  |           |      |  |  | 14.6 | 0.9 |  |  |  |  |  |
| 27. | GD-10  | 77.17    | 33.068   | 4450 |  |  |           |      |  |  | 18.5 | 3.1 |  |  |  |  |  |
| 28. | GD-11  | 77.19    | 33.076   | 4133 |  |  | 12.7      | 0.4  |  |  |      |     |  |  |  |  |  |
| 29. | M1     | 76.924   | 32.967   | 4162 |  |  | 6.4       | 0.5  |  |  | 17.6 | 1.3 |  |  |  |  |  |
| 30. | M2     | 76.9255  | 32.957   | 4090 |  |  | 10.7      | 0.7  |  |  |      |     |  |  |  |  |  |
| 31. | M3     | 76.922   | 32.934   | 4911 |  |  | 8.2       | 0.4  |  |  |      |     |  |  |  |  |  |
| 32. | K3     | 76.866   | 32.878   | 3575 |  |  | 7.9       | 0.6  |  |  |      |     |  |  |  |  |  |
| 33. | KU1    | 76.886   | 32.875   | 4121 |  |  | 5.7       | 1.1  |  |  | 16.9 | 1.1 |  |  |  |  |  |
| 34. | K1     | 76.898   | 33.883   | 4211 |  |  |           |      |  |  | 17   | 0.9 |  |  |  |  |  |
| 35. | PIAP   | 76.7397  | 33.53132 | 4643 |  |  | 8.04      | 0.37 |  |  |      |     |  |  |  |  |  |
| 36. | P3AP   | 76.64109 | 33.58173 | 4892 |  |  | 7.61      | 0.39 |  |  |      |     |  |  |  |  |  |
| 37. | P4AP   | 76.59948 | 33.52893 | 5155 |  |  | 8.07      | 0.43 |  |  |      |     |  |  |  |  |  |
| 38. | P5AP   | 76.5778  | 33.51756 | 4664 |  |  | 9.52      | 0.22 |  |  |      |     |  |  |  |  |  |
| 39. | P6AP   | 76.62631 | 33.55361 | 5313 |  |  | 7.48      | 0.25 |  |  |      |     |  |  |  |  |  |
| 40. | P7AP   | 76.85072 | 33.43211 | 4916 |  |  | 9.54      | 0.29 |  |  |      |     |  |  |  |  |  |
| 41. | P8AP   | 76.8662  | 33.41501 | 5041 |  |  | 6.34      | 0.25 |  |  |      |     |  |  |  |  |  |
| 42. | P9AP   | 76.86916 | 33.38745 | 5365 |  |  | 10.3<br>3 | 0.37 |  |  |      |     |  |  |  |  |  |
| 43. | P10AP  | 76.85867 | 33.37335 | 5568 |  |  | 9.71      | 0.24 |  |  |      |     |  |  |  |  |  |
| 44. | P11AP  | 76.7419  | 33.46171 | 5653 |  |  | 9.66      | 0.27 |  |  |      |     |  |  |  |  |  |
| 45. | P12AP  | 76.75115 | 33.47618 | 5061 |  |  | 11.04     | 0.28 |  |  |      |     |  |  |  |  |  |
| 46. | P13AP  | 76.77932 | 33.49205 | 4588 |  |  | 11.67     | 0.64 |  |  |      |     |  |  |  |  |  |
| 47. | P15AP  | 76.41393 | 33.68437 | 4772 |  |  | 10.7<br>9 | 0.59 |  |  |      |     |  |  |  |  |  |
| 48. | P16AP1 | 76.26662 | 33.89859 | 4910 |  |  | 8.12      | 0.41 |  |  |      |     |  |  |  |  |  |
| 49. | P16AP2 | 76.26662 | 33.89859 | 4910 |  |  | 7.64      | 0.59 |  |  |      |     |  |  |  |  |  |
| 50. | P17AP  | 76.30023 | 33.85618 | 5605 |  |  | 7.65      | 0.43 |  |  |      |     |  |  |  |  |  |
| 51. | P18AP  | 76.22101 | 34.01541 | 4698 |  |  | 7.33      | 0.99 |  |  |      |     |  |  |  |  |  |
| 52. | P19AP  | 76.10019 | 34.04741 | 5538 |  |  | 4.93      | 0.31 |  |  |      |     |  |  |  |  |  |
| 53. | P20AP  | 76.1252  | 34.0403  | 4623 |  |  | 6.36      | 0.34 |  |  |      |     |  |  |  |  |  |

Suru  
Dome  
Kumar et al.,  
1995

|     |              |          |          |      |  |  |           |      |  |  |       |      |       |      |       |      |                                             |
|-----|--------------|----------|----------|------|--|--|-----------|------|--|--|-------|------|-------|------|-------|------|---------------------------------------------|
| 54. | P21AP        | 75.93675 | 34.04259 | 3839 |  |  | 5.57      | 0.55 |  |  |       |      |       |      |       |      |                                             |
| 55. | P23AP        | 76.72135 | 33.54312 | 4407 |  |  | 10.2<br>6 | 0.3  |  |  |       |      |       |      |       |      |                                             |
| 56. | P25AP        | 76.19501 | 34.01244 | 5614 |  |  | 5.32      | 0.29 |  |  |       |      |       |      |       |      |                                             |
| 57. | P6ZR         | 76.626   | 33.553   | 5304 |  |  |           |      |  |  | 12.52 | 1.33 |       |      |       |      |                                             |
| 58. | H19          | 76.0098  | 34.083   | 3600 |  |  |           |      |  |  |       |      |       |      | 15.15 | 0.34 |                                             |
| 59. | H24          | 76.179   | 34.059   | 4120 |  |  |           |      |  |  |       |      |       |      | 19.97 | 0.45 |                                             |
| 60. | H33          | 76.378   | 33.970   | 4280 |  |  |           |      |  |  |       |      |       |      | 22.55 | 0.50 |                                             |
| 61. | P18/74       | 76.599   | 33.565   | 4140 |  |  | 8.1       | 0.4  |  |  |       |      |       |      | 24.9  | 0.6  | Chisoti<br>Dome<br>Sorkhabi et<br>al., 1996 |
| 62. | P49/189      | 76.741   | 33.503   | 4080 |  |  | 11        | 0.3  |  |  |       |      |       |      | 19.7  | 0.4  |                                             |
| 63. | U21/21       | 76.482   | 33.439   | 4440 |  |  | 7.1       | 0.3  |  |  |       |      |       |      | 17.4  | 0.4  |                                             |
| 64. | U32/34       | 76.417   | 33.437   | 3420 |  |  | 4.9       | 0.4  |  |  |       |      |       |      | 16.8  | 0.4  |                                             |
| 65. | U50/53       | 76.402   | 33.365   | 3360 |  |  | 5.5       | 0.2  |  |  |       |      |       |      | 15.8  | 0.4  |                                             |
| 66. | U77/89       | 76.255   | 33.386   | 2360 |  |  | 4.4       | 0.5  |  |  |       |      |       |      | 13.7  | 0.3  |                                             |
| 67. | A63/77       | 76.357   | 33.428   | 2800 |  |  | 4.1       | 0.2  |  |  |       |      |       |      | 16.1  | 0.4  |                                             |
| 68. | A67/87       | 76.365   | 33.432   | 3480 |  |  | 4.9       | 0.3  |  |  |       |      |       |      | 17.4  | 0.4  | Chisoti<br>Dome<br>Kumar et al.,<br>1995    |
| 69. | KUM1         | 76.266   | 33.51    | 3653 |  |  | 4.1       | 0.2  |  |  | 10    | 0.6  |       |      |       |      |                                             |
| 70. | KUM2         | 76.293   | 33.468   | 3462 |  |  | 3.6       | 0.5  |  |  |       |      |       |      |       |      |                                             |
| 71. | KUM3         | 76.414   | 33.486   | 3967 |  |  | 6.5       | 0.4  |  |  | 10.8  | 0.8  |       |      |       |      |                                             |
| 72. | KUM4         | 76.401   | 33.466   | 4369 |  |  | 6.3       | 0.2  |  |  |       |      |       |      |       |      |                                             |
| 73. | KUM5         | 76.443   | 33.429   | 3844 |  |  | 4.9       | 0.4  |  |  |       |      |       |      |       |      |                                             |
| 74. | KUM6         | 76.511   | 33.411   | 4352 |  |  | 7.1       | 0.3  |  |  |       |      |       |      |       |      |                                             |
| 75. | KUM7         | 76.5192  | 33.4203  | 4470 |  |  | 8         | 0.3  |  |  | 12.3  | 0.7  |       |      |       |      |                                             |
| 76. | KUM8         | 76.484   | 33.339   | 4656 |  |  | 7.1       | 0.3  |  |  |       |      |       |      |       |      |                                             |
| 77. | KUM9         | 76.445   | 33.346   | 3912 |  |  | 5.2       | 0.3  |  |  |       |      |       |      |       |      |                                             |
| 78. | KUM10        | 76.421   | 33.365   | 3628 |  |  | 5.5       | 0.2  |  |  |       |      |       |      |       |      |                                             |
| 79. | KUM11        | 76.389   | 33.421   | 3447 |  |  | 4.9       | 0.3  |  |  |       |      |       |      |       |      |                                             |
| 80. | KUM12        | 76.374   | 33.398   | 3301 |  |  | 4.5       | 0.4  |  |  |       |      |       |      |       |      |                                             |
| 81. | KUM13        | 76.365   | 33.427   | 3887 |  |  | 4.1       | 0.2  |  |  | 6.5   | 0.6  |       |      |       |      |                                             |
| 82. | KUM14        | 76.321   | 33.412   | 3043 |  |  | 3         | 0.2  |  |  |       |      |       |      |       |      |                                             |
| 83. | KUM15        | 76.318   | 33.346   | 4946 |  |  | 2.6       | 0.3  |  |  |       |      |       |      |       |      |                                             |
| 84. | KUM16        | 76.302   | 33.365   | 3884 |  |  | 5         | 0.5  |  |  |       |      |       |      |       |      |                                             |
| 85. | KUM17        | 76.313   | 33.366   | 4535 |  |  | 4.2       | 0.4  |  |  | 8.4   | 0.7  |       |      |       |      |                                             |
| 86. | KUM18        | 76.3022  | 33.4008  | 3239 |  |  | 2.1       | 0.2  |  |  | 6.8   | 0.4  |       |      |       |      |                                             |
| 87. | KUM19        | 76.272   | 33.392   | 3113 |  |  | 4.4       | 0.5  |  |  | 6.2   | 0.6  |       |      |       |      |                                             |
| 88. | Â KT202      | 84.8238  | 29.1784  | 4975 |  |  |           |      |  |  |       |      | 21.29 | 0.16 |       |      |                                             |
| 89. | Â CH122<br>B | 84.8163  | 29.135   | 5724 |  |  |           |      |  |  |       |      | 18.43 | 0.25 |       |      |                                             |

|      |              |          |          |      |  |  |      |      |  |  |  |  |       |      |       |      |                                                        |
|------|--------------|----------|----------|------|--|--|------|------|--|--|--|--|-------|------|-------|------|--------------------------------------------------------|
| 90.  | Â CH123<br>B | 84.8117  | 29.1301  | 5393 |  |  |      |      |  |  |  |  | 17.62 | 0.25 | 16.76 | 0.22 | Changgo-<br>Malashan<br>Dome<br>Larson et al.,<br>2010 |
| 91.  | Â KTG9A      | 84.7847  | 29.1446  | 5491 |  |  |      |      |  |  |  |  | 18.82 | 0.08 |       |      |                                                        |
| 92.  | Â KTG9C      | 84.7847  | 29.1446  | 5491 |  |  |      |      |  |  |  |  | 18.65 | 0.06 |       |      |                                                        |
| 93.  | Malashan     | 85.251   | 29.007   | 5570 |  |  |      |      |  |  |  |  | 15.93 | 0.04 | 15.5  | 0.06 | Aoya et al.,<br>2006                                   |
| 94.  | Aoya1        | 85.4398  | 29.0047  | 4807 |  |  |      |      |  |  |  |  | 15.93 | 0.04 | 15.50 | 0.06 | Aoya et al.,<br>2005                                   |
| 95.  | Aoya2        | 85.3468  | 28.9652  | 5809 |  |  |      |      |  |  |  |  | 15.68 | 0.03 | 15.27 | 0.06 |                                                        |
| 96.  | Shen1        | 85.3167  | 28.8857  | 4286 |  |  | 16   | 1.5  |  |  |  |  |       |      |       |      | Shen et al.,<br>2016                                   |
| 97.  | Shen2        | 85.3317  | 28.9     | 4337 |  |  | 15.8 | 1.5  |  |  |  |  |       |      |       |      |                                                        |
| 98.  | Shen3        | 85.3678  | 28.9092  | 4936 |  |  | 13.4 | 0.95 |  |  |  |  |       |      |       |      |                                                        |
| 99.  | Shen4        | 85.3761  | 28.9101  | 5016 |  |  | 16.6 | 1.25 |  |  |  |  |       |      |       |      |                                                        |
| 100. | Shen5        | 85.3808  | 28.9043  | 5157 |  |  | 19.3 | 1.75 |  |  |  |  |       |      |       |      |                                                        |
| 101. | Shen6        | 85.3467  | 28.9505  | 5156 |  |  | 17.2 | 1.1  |  |  |  |  |       |      |       |      |                                                        |
| 102. | GD05         | 88.563   | 28.487   | 4960 |  |  |      |      |  |  |  |  |       |      |       |      | Kampa<br>Dome<br>Quigley et<br>al., 2006               |
| 103. | GDO8b        | 88.628   | 28.4724  | 4612 |  |  |      |      |  |  |  |  |       |      | 14.64 | 0.15 |                                                        |
| 104. | GD08m        | 88.628   | 28.4724  | 4612 |  |  |      |      |  |  |  |  | 14.65 | 0.08 |       |      |                                                        |
| 105. | GD12         | 88.609   | 28.457   | 4598 |  |  |      |      |  |  |  |  | 19.9  | 1    |       |      |                                                        |
| 106. | GD23b        | 88.624   | 28.554   | 4715 |  |  |      |      |  |  |  |  |       |      | 14.22 | 0.18 |                                                        |
| 107. | GD23m        | 88.624   | 28.554   | 4715 |  |  |      |      |  |  |  |  | 14.65 | 0.39 |       |      |                                                        |
| 108. | GD25         | 88.623   | 28.542   | 4690 |  |  |      |      |  |  |  |  |       |      | 13.74 | 0.28 |                                                        |
| 109. | GD26         | 88.623   | 28.542   | 4690 |  |  |      |      |  |  |  |  |       |      | 13.8  | 0.07 |                                                        |
| 110. | GD28b        | 88.62    | 28.5438  | 4681 |  |  |      |      |  |  |  |  |       |      | 15.42 | 0.3  |                                                        |
| 111. | GD28m        | 88.62    | 28.5438  | 4681 |  |  |      |      |  |  |  |  | 14.68 | 0.07 |       |      |                                                        |
| 112. | GD30b        | 88.62    | 28.5438  | 4681 |  |  |      |      |  |  |  |  |       |      | 15.39 | 0.23 |                                                        |
| 113. | GD30m        | 88.62    | 28.5438  | 4681 |  |  |      |      |  |  |  |  | 15.54 | 0.39 |       |      |                                                        |
| 114. | KD09C        | 89.66667 | 28.62167 | 4300 |  |  |      |      |  |  |  |  | 14.82 | 0.04 |       |      | Kangmar<br>Dome<br>Lee et al.,<br>2000                 |
| 115. | KD12C        | 89.65667 | 28.72667 | 4200 |  |  |      |      |  |  |  |  | 12.33 | 0.03 | 10.94 | 0.03 |                                                        |
| 116. | KD13B        | 89.65333 | 28.72    | 4170 |  |  | 4.1  | 1.9  |  |  |  |  |       |      | 12.61 | 0.03 |                                                        |
| 117. | KD20         | 89.65833 | 28.67167 | 4250 |  |  | 5.7  | 2.3  |  |  |  |  | 14.56 | 0.05 | 16.28 | 0.04 |                                                        |
| 118. | KD42AA       | 89.7     | 28.655   | 4700 |  |  | 6.5  | 1.3  |  |  |  |  |       |      | 13.66 | 0.03 |                                                        |
| 119. | KD56AA       | 89.63833 | 28.65    | 4560 |  |  | 4.6  | 3.4  |  |  |  |  |       |      | 14.46 | 0.03 |                                                        |
| 120. | KD56BB       | 89.63833 | 28.65    | 4560 |  |  |      |      |  |  |  |  | 14.98 | 0.03 | 14.91 | 0.03 |                                                        |
| 121. | KD61         | 89.68167 | 28.655   | 4480 |  |  | 7.9  | 3    |  |  |  |  | 15.24 | 0.05 | 15.99 | 0.04 |                                                        |
| 122. | KD77         | 89.64833 | 28.72833 | 4230 |  |  |      |      |  |  |  |  |       |      | 11.82 | 0.03 |                                                        |

|      |       |          |          |      |  |  |      |     |     |     |      |     |       |      |       |      |                                   |
|------|-------|----------|----------|------|--|--|------|-----|-----|-----|------|-----|-------|------|-------|------|-----------------------------------|
| 123. | KD87B | 89.66833 | 28.60833 | 4340 |  |  |      |     |     |     |      |     | 13.35 | 0.03 | 12.86 | 0.04 | Ma et al.,<br>2023                |
| 124. | KD88B | 89.66667 | 28.62167 | 4300 |  |  | 4.7  | 1.5 |     |     |      |     | 14.82 | 0.03 | 17.04 | 0.04 |                                   |
| 125. | KD89  | 89.635   | 28.7     | 4470 |  |  |      |     |     |     |      |     | 12.71 | 0.04 | 12.12 | 0.03 |                                   |
| 126. | D0812 | 89.6688  | 28.6146  | 5100 |  |  | 5.9  | 0.9 | 9.2 | 0.5 | 15   | 0.7 |       |      |       |      |                                   |
| 127. | D0813 | 89.6653  | 28.6439  | 5000 |  |  | 5.4  | 0.9 |     |     |      |     |       |      |       |      |                                   |
| 128. | D0814 | 89.6631  | 28.6461  | 4900 |  |  | 4.3  | 0.7 |     |     |      |     |       |      |       |      |                                   |
| 129. | D0815 | 89.6624  | 28.6485  | 4800 |  |  | 3.5  | 0.5 |     |     |      |     |       |      |       |      |                                   |
| 130. | D0816 | 89.6623  | 28.6502  | 4700 |  |  | 4.5  | 0.7 | 9.2 | 0.6 | 13.6 | 0.6 |       |      |       |      |                                   |
| 131. | D0817 | 89.6618  | 28.6516  | 4620 |  |  | 2.7  | 0.5 |     |     |      |     |       |      |       |      |                                   |
| 132. | D0819 | 89.6613  | 28.6545  | 4460 |  |  | 3.7  | 0.5 |     |     |      |     |       |      |       |      |                                   |
| 133. | D0820 | 89.6614  | 28.6563  | 4380 |  |  | 4.6  | 0.6 | 8.7 | 0.6 | 17.3 | 0.9 |       |      |       |      |                                   |
| 134. | D7101 | 89.6437  | 28.665   | 5060 |  |  | 8.9  | 3.9 |     |     |      |     |       |      |       |      |                                   |
| 135. | D7103 | 89.6486  | 28.667   | 4860 |  |  | 5.9  | 0.7 | 9.2 | 0.5 | 14.7 | 0.6 |       |      |       |      |                                   |
| 136. | D7105 | 89.6531  | 28.673   | 4660 |  |  | 6    | 0.7 | 8.9 | 0.6 | 16.8 | 0.8 |       |      |       |      |                                   |
| 137. | D7107 | 89.6577  | 28.6809  | 4420 |  |  | 5.8  | 0.8 |     |     |      |     |       |      |       |      |                                   |
| 138. | D7108 | 89.6587  | 28.6825  | 4310 |  |  | 4.1  | 0.7 |     |     |      |     |       |      |       |      |                                   |
| 139. | D7109 | 89.6597  | 28.6846  | 4200 |  |  | 2.7  | 0.5 | 9.2 | 0.5 |      |     |       |      |       |      |                                   |
| 140. | MD31B | 88.2239  | 28.80598 | 4921 |  |  |      |     |     |     |      |     | 12.79 | 0.12 |       |      | Mabja Dome<br>Lee et al.,<br>2006 |
| 141. | MD48A | 88.2786  | 28.72873 | 5484 |  |  |      |     |     |     |      |     | 14.03 | 0.14 | 15.37 | 0.14 |                                   |
| 142. | MD52  | 88.27867 | 28.70325 | 5588 |  |  | 9.5  | 1.2 |     |     |      |     | 13.39 | 0.12 | 13.6  | 0.12 |                                   |
| 143. | MD79  | 88.202   | 28.6924  | 5095 |  |  |      |     |     |     |      |     | 16.77 | 0.15 | 15.88 | 0.15 |                                   |
| 144. | MD86  | 88.15667 | 28.7243  | 5328 |  |  | 9.2  | 1.2 |     |     |      |     | 13.14 | 0.05 | 12.93 | 0.06 |                                   |
| 145. | MD97  | 88.26438 | 28.66685 | 5378 |  |  | 9.9  | 2.3 |     |     |      |     | 13.54 | 0.05 |       |      |                                   |
| 146. | MD100 | 88.2327  | 28.7095  | 5234 |  |  |      |     |     |     |      |     | 16.27 | 0.15 |       |      |                                   |
| 147. | MD47  | 88.2022  | 28.69386 | 5058 |  |  |      |     |     |     |      |     | 16.99 | 0.15 |       |      |                                   |
| 148. | MD49A | 88.25995 | 28.74848 | 5213 |  |  |      |     |     |     |      |     | 15.37 | 0.14 |       |      |                                   |
| 149. | MD71  | 88.28447 | 28.71259 | 5628 |  |  | 11.5 | 1.6 |     |     |      |     | 13.48 | 0.12 | 13.6  | 0.11 |                                   |
| 150. | MD64A | 88.29698 | 28.70365 | 5557 |  |  | 8.4  | 1.4 |     |     |      |     | 13.69 | 0.12 | 13.79 | 0.13 |                                   |
| 151. | MD69B | 88.3046  | 28.6979  | 5627 |  |  |      |     |     |     |      |     | 13.33 | 0.06 |       |      |                                   |
| 152. | MD33  | 88.23515 | 28.80046 | 5069 |  |  | 8.3  | 2.3 |     |     |      |     |       |      | 15.51 | 0.14 |                                   |
| 153. | MD39  | 88.2589  | 28.7579  | 5284 |  |  | 10.7 | 2.6 |     |     |      |     |       |      | 17.6  | 0.15 |                                   |
| 154. | MD37  | 88.28096 | 28.71422 | 5518 |  |  |      |     |     |     |      |     |       |      | 13.49 | 0.12 |                                   |
| 155. | MD69A | 88.2856  | 28.71486 | 5472 |  |  |      |     |     |     |      |     |       |      | 13.48 | 0.11 |                                   |

**Table S1b: Compiled cooling ages from MCT to STDS in the NW Himalaya.**

| SAMPLE   | LON      | LAT      | HEIGHT | AHE | DAHE | AFT | DAFT | ZHE | DZHE | BAR  | DBAR | MAR | DMAR | References              |
|----------|----------|----------|--------|-----|------|-----|------|-----|------|------|------|-----|------|-------------------------|
| GBD-5c   | 76.90175 | 32.93034 | 3882   |     |      |     |      |     |      |      | 21.3 | 0.2 | 20.7 | 0.1 Horton et al., 2014 |
| GBD-15   | 76.90836 | 32.94436 | 4084   |     |      |     |      |     |      |      |      |     | 20.7 | 0.2                     |
| GBD-26c  | 76.88536 | 32.95797 | 4109   |     |      |     |      |     |      | 21.4 | 0.2  |     | 20.7 | 0.1                     |
| GBD-29b  | 76.88853 | 32.96137 | 4263   |     |      |     |      |     |      |      |      |     | 20.7 | 0.2                     |
| GBD-33   | 76.91902 | 32.98282 | 4292   |     |      |     |      |     |      | 22   | 0.2  |     |      |                         |
| GBD-34   | 76.9197  | 32.9813  | 4283   |     |      |     |      |     |      | 23   | 0.2  |     |      |                         |
| GBD-36b  | 76.91834 | 32.9747  | 4379   |     |      |     |      |     |      | 22.6 | 0.2  |     | 20.8 | 0.1                     |
| GBD-38   | 76.91959 | 32.96735 | 4322   |     |      |     |      |     |      |      |      |     | 21.1 | 0.2                     |
| GBD-45b  | 76.89998 | 32.90104 | 3832   |     |      |     |      |     |      | 21.8 | 0.1  |     |      |                         |
| GBD- 51b | 76.83001 | 32.86728 | 3471   |     |      |     |      |     |      | 25.9 | 0.2  |     |      |                         |
| GBD-52b  | 76.83075 | 32.8673  | 3466   |     |      |     |      |     |      | 25.1 | 0.2  |     | 21.4 | 0.1                     |
| GBD-57a  | 77.15437 | 33.07651 | 4321   |     |      |     |      |     |      | 20.4 | 0.1  |     | 20.2 | 0.2                     |
| GBD-60b  | 77.15351 | 33.07519 | 4281   |     |      |     |      |     |      | 21.4 | 0.1  |     | 21.4 | 0.3                     |
| GBD- 63b | 77.11447 | 33.05773 | 4373   |     |      |     |      |     |      | 19.8 | 0.1  |     | 19.7 | 0.1                     |
| GBD-64c  | 77.11371 | 33.05815 | 4403   |     |      |     |      |     |      | 19.6 | 0.2  |     | 19.8 | 0.2                     |
| GBD- 64d | 77.11371 | 33.05815 | 4399   |     |      |     |      |     |      | 19.9 | 0.2  |     | 20.1 | 0.2                     |
| GBD-67a  | 77.11839 | 33.05863 | 4379   |     |      |     |      |     |      |      |      |     | 19.9 | 0.2                     |
| GBD-79c  | 77.13253 | 33.06576 | 4370   |     |      |     |      |     |      | 22.7 | 0.2  |     | 20.4 | 0.2                     |
| GBD-90b  | 77.09758 | 33.05584 | 4436   |     |      |     |      |     |      | 21.6 | 0.2  |     | 20.2 | 0.2                     |
| GBD-100b | 77.03239 | 33.04867 | 4484   |     |      |     |      |     |      | 20.9 | 0.2  |     | 21.1 | 0.2                     |
| GBD-101b | 77.02861 | 33.04776 | 4491   |     |      |     |      |     |      | 22.5 | 0.1  |     |      |                         |
| AD07-01  | 76.8679  | 32.6065  | 3105   |     |      |     | 4.3  | 0.5 | 12.6 | 1.3  |      |     |      | Deeken et al., 2011     |
| AD07-02  | 76.8532  | 32.59    | 3380   |     |      |     | 5.3  | 0.6 | 14.9 | 1.5  |      |     |      |                         |
| AD07-03  | 76.8536  | 32.5759  | 3625   |     |      |     | 3.5  | 0.8 | 14.1 | 1.4  |      |     |      |                         |
| AD07-04  | 76.8475  | 32.5585  | 4030   |     |      |     | 5    | 0.7 | 13.6 | 1.4  |      |     |      |                         |
| AD07-05  | 76.8371  | 32.5351  | 4615   |     |      |     | 6.3  | 1   | 17   | 1.7  |      |     |      |                         |
| AD07-06  | 76.8313  | 32.5291  | 5070   |     |      |     | 6.7  | 0.9 | 15.1 | 1.5  |      |     |      |                         |
| AD07-07  | 76.808   | 32.5131  | 3900   |     |      |     | 9.3  | 0.9 | 18.1 | 1.8  |      |     |      |                         |
| AD07-08  | 76.7899  | 32.4993  | 3715   |     |      |     | 5.4  | 0.7 | 15.5 | 1.6  |      |     |      |                         |
| AD07-09  | 76.7713  | 32.4997  | 3455   |     |      |     | 3.8  | 0.7 |      |      |      |     |      |                         |
| AD07-10  | 76.6917  | 32.4717  | 2515   |     |      |     | 2    | 0.5 |      |      |      |     |      |                         |
| AD07-12  | 76.4509  | 32.4666  | 1465   |     |      |     | 2.3  | 0.4 | 11.8 | 1.2  |      |     |      |                         |
| AD07-13  | 76.53    | 32.3502  | 1730   |     |      |     | 1.7  | 0.3 |      |      |      |     |      |                         |
| AD07-14  | 76.4666  | 32.353   | 2055   |     |      |     |      |     | 9.4  | 1.3  |      |     |      |                         |
| AD07-15  | 76.4114  | 32.3288  | 2985   |     |      |     | 2.8  | 0.4 |      |      |      |     |      |                         |
| AD07-16  | 76.3933  | 32.306   | 3705   |     |      |     | 2.8  | 0.4 | 11.2 | 1.1  |      |     |      |                         |
| AD07-17  | 76.9812  | 32.297   | 4340   |     |      |     | 2.4  | 0.5 | 12.2 | 1.2  |      |     |      |                         |
| AD07-18  | 76.3836  | 32.2992  | 4230   |     |      |     | 3.7  | 0.4 | 14.5 | 1.5  |      |     |      |                         |
| AD07-19  | 76.3735  | 32.2899  | 3620   |     |      |     |      |     | 9.2  | 0.9  |      |     |      |                         |
| AD07-20  | 76.3694  | 32.2853  | 3300   |     |      |     | 3.2  | 0.5 | 8.3  | 0.8  |      |     |      |                         |
| AD07-22  | 76.3584  | 32.278   | 3130   |     |      |     | 2.9  | 0.2 | 6.4  | 0.6  |      |     |      |                         |

|         |          |         |      |      |     |      |     |
|---------|----------|---------|------|------|-----|------|-----|
| AD07-23 | 76.3441  | 32.325  | 2460 | 2.8  | 0.3 | 6.3  | 0.6 |
| AD07-28 | 76.038   | 32.4573 | 1980 | 4.4  | 0.3 |      |     |
| AD07-29 | 76.0556  | 32.4885 | 2405 |      |     | 13   | 0.6 |
| AD07-42 | 76.37    | 32.0848 | 2305 |      |     | 7.4  | 0.7 |
| AD07-43 | 77.118   | 32.806  | 4080 | 7.1  | 0.5 | 14   | 1.4 |
| AD07-47 | 77.175   | 32.696  | 3515 | 5.9  | 0.5 | 13.5 | 1.4 |
| AD07-49 | 76.8228  | 32.8647 | 3360 | 5.9  | 0.7 | 13.8 | 1.4 |
| AD07-50 | 76.8742  | 32.8729 | 3705 |      |     | 12.6 | 1.3 |
| AD07-51 | 76.7842  | 33.0559 | 4270 |      |     | 11.4 | 1.1 |
| AD07-52 | 76.7925  | 33.0555 | 4600 | 8.7  | 0.5 | 12.3 | 1.2 |
| AD07-53 | 76.8314  | 32.9921 | 4170 | 7.7  | 0.5 | 13.3 | 1.3 |
| AD07-54 | 76.8168  | 32.987  | 4570 | 7.4  | 0.5 | 15.3 | 1.5 |
| AD07-55 | 76.8094  | 32.9907 | 5050 |      |     | 13.8 | 1.4 |
| AD07-56 | 76.8094  | 32.9907 | 5050 | 6.39 | 1   |      |     |
| AD07-57 | 76.76385 | 32.8417 | 2930 | 4.8  | 0.5 | 11.8 | 1.2 |
| AD07-58 | 76.6696  | 32.7277 | 2645 |      |     | 16.3 | 1.6 |

**Table. S2: Apatite and Zircon fission track results from Gianbul Dome.**

| Sl. No | Sample code | Longitude (E) | Latitude (N) | Ele. (m) | Lithology      | No of Grains | Spontaneous track density<br>Ns ps $\times 10^6$ cm <sup>-2</sup> |       | Induced track density Ni pi $\times 10^6$ cm <sup>-2</sup> |       | Glass dosimeter Nd pd $\times 10^6$ cm <sup>-2</sup> |       | P ( $\chi^2$ )% | U (ppm) | Central age $\pm 1\sigma$ (Ma) |
|--------|-------------|---------------|--------------|----------|----------------|--------------|-------------------------------------------------------------------|-------|------------------------------------------------------------|-------|------------------------------------------------------|-------|-----------------|---------|--------------------------------|
| 1      | GD3 A       | 77.139        | 33.049       | 4642     | Migmatite      | 16           | 226                                                               | 0.139 | 4977                                                       | 3.012 | 3866                                                 | 1.683 | 19.79           | 26.8    | 9.9 $\pm$ 0.8                  |
| 2      | GD3 Z       | 77.139        | 33.049       | 4642     |                | 18           | 1502                                                              | 5.871 | 2504                                                       | 9.650 | 2427                                                 | 0.485 | 11.36           | 994     | 15.4 $\pm$ 0.7                 |
| 3      | GD6 A       | 77.0156       | 33.0328      | 5128     | Migmatite      | 29           | 535                                                               | 0.148 | 9675                                                       | 2.724 | 3866                                                 | 1.683 | 25.63           | 24.3    | 12 $\pm$ 0.6                   |
| 4      | GD7 A       | 77.0447       | 33.0344      | 5005     | Migmatite      | 21           | 237                                                               | 0.223 | 3685                                                       | 3.297 | 3866                                                 | 1.683 | 6.84            | 29.4    | 14.2 $\pm$ 1.2                 |
| 5      | GD7 Z       | 77.0447       | 33.0344      | 5005     |                | 12           | 222                                                               | 2.814 | 245                                                        | 3.310 | 2427                                                 | 0.485 | 97.51           | 340     | 22.8 $\pm$ 2.2                 |
| 6      | GD8 A       | 77.0752       | 33.0379      | 4799     | Migmatite      | 25           | 338                                                               | 0.128 | 6300                                                       | 2.391 | 3866                                                 | 1.683 | 18.47           | 21.3    | 11.7 $\pm$ 0.7                 |
| 7      | GD9 Z       | 77.156        | 33.0595      | 4649     | Kyanite Schist | 8            | 414                                                               | 3.248 | 722                                                        | 5.191 | 2427                                                 | 0.485 | 50.41           | 534.7   | 14.6 $\pm$ 0.9                 |
| 8      | GD10 Z      | 77.17         | 33.068       | 4450     | Garnet Schist  | 13           | 112                                                               | 2.567 | 198                                                        | 4.228 | 2427                                                 | 0.485 | 12.22           | 435.5   | 18.5 $\pm$ 3.1                 |
| 9      | GD11 A      | 77.19         | 33.076       | 4133     | Phyllite       | 20           | 944                                                               | 0.555 | 16555                                                      | 9.806 | 8663.5                                               | 1.733 | 87.27           | 84.9    | 12.7 $\pm$ 0.4                 |
| 10     | K1 Z        | 76.898        | 32.883       | 4211     | Orthogneiss    | 12           | 819                                                               | 3.721 | 1215                                                       | 5.596 | 2427                                                 | 0.485 | 20.81           | 576.5   | 17 $\pm$ 0.9                   |
| 11     | K3 A        | 76.866        | 32.878       | 3575     | Orthogneiss    | 27           | 256                                                               | 0.113 | 7209                                                       | 3.226 | 8663.5                                               | 1.733 | 28.14           | 27.9    | 7.9 $\pm$ 0.6                  |
| 12     | KU1 A       | 76.886        | 32.875       | 4121     | Granite        | 9            | 26                                                                | 0.03  | 987                                                        | 1.144 | 3866                                                 | 1.683 | 89.37           | 10.2    | 5.7 $\pm$ 1.1                  |
| 13     | KU1 Z       | 76.886        | 32.875       | 4121     |                | 14           | 470                                                               | 5.705 | 708                                                        | 8.772 | 2427                                                 | 0.485 | 75.43           | 903.6   | 16.9 $\pm$ 1.1                 |
| 14     | M1 A        | 76.924        | 32.967       | 4162     | Migmatite      | 23           | 299                                                               | 0.202 | 10164                                                      | 6.924 | 3866                                                 | 1.683 | 5.21            | 61.7    | 6.4 $\pm$ 0.5                  |
| 15     | M1 Z        | 76.924        | 32.967       | 4162     |                | 11           | 352                                                               | 6.604 | 508                                                        | 9.880 | 2427                                                 | 0.485 | 51.91           | 1017.7  | 17.6 $\pm$ 1.3                 |
| 16     | M2 A        | 76.9255       | 32.957       | 4090     | Schist         | 25           | 315                                                               | 0.63  | 6379                                                       | 1.276 | 3866                                                 | 1.683 | 27.8            | 113.7   | 10.7 $\pm$ 0.7                 |
| 17     | M3 A        | 76.922        | 32.934       | 4911     | Schist         | 24           | 547                                                               | 0.259 | 14908                                                      | 7.159 | 8663.5                                               | 1.733 | 9.26            | 62      | 8.2 $\pm$ 0.4                  |

**Table. S3 Thermal and Mechanical Parameter Values Specific for Pecube Forward Modeling.**

| Parameters name                             | Value              | Units               | References                              |
|---------------------------------------------|--------------------|---------------------|-----------------------------------------|
| <b>Crustal Density</b>                      | 2700               | kg/m <sup>3</sup>   | <a href="#">Valla et al. (2010)</a>     |
| <b>Mantle Density</b>                       | 3200               | kg/m <sup>3</sup>   | <a href="#">Valla et al. (2010)</a>     |
| <b>Young's modulus</b>                      | 1×10 <sup>11</sup> | Pa                  | <a href="#">Ge et al.(2020)</a>         |
| <b>Poisson ratio</b>                        | 0.25               |                     | <a href="#">Ge et al.(2020)</a>         |
| <b>Equivalent elastic thickness</b>         | 28.8               | km                  | <a href="#">Ge et al.(2020)</a>         |
| <b>Model thickness</b>                      |                    |                     |                                         |
| Gianbul Dome                                | 40                 | Km                  | <a href="#">Dezes et al., 1999</a>      |
| Suru Dome                                   | 35                 | Km                  |                                         |
| Chisoti Dome                                | 35                 | Km                  |                                         |
| Changgo -Malashan Dome                      | 60                 | Km                  |                                         |
| Mabja Dome                                  | 35                 | Km                  |                                         |
| Kampa Dome                                  | 57                 | Km                  |                                         |
| Kangmar Dome                                | 57                 | Km                  |                                         |
| <b>nx*ny</b>                                |                    |                     |                                         |
| Gianbul Dome                                | 7952*6782          | Km                  |                                         |
| Suru Dome                                   | 10616*8564         | Km                  |                                         |
| Chisoti Dome                                | 10616*8564         | Km                  |                                         |
| Changgo -Malashan Dome                      | 6803*9512          | Km                  |                                         |
| Mabja Dome                                  | 4940*11838         | Km                  |                                         |
| Kampa Dome                                  | 4940*11838         | Km                  |                                         |
| Kangmar Dome                                | 2481*11528         | Km                  |                                         |
| <b>Thermal Diffusivity</b>                  | 25                 | km <sup>2</sup> /Ma | <a href="#">Braun and Robert (2005)</a> |
| <b>Temperature at the base of the model</b> |                    |                     |                                         |
| Gianbul Dome                                | 550                | °C                  |                                         |
| Suru Dome                                   | 400                | °C                  |                                         |
| Chisoti Dome                                | 650                | °C                  |                                         |
| Chisoti Dome                                | 550                | °C                  |                                         |
| Changgo -Malashan Dome                      | 350                | °C                  |                                         |
| Mabja Dome                                  | 510                | °C                  |                                         |

|                                                   |         |                     |                                                                                                                   |
|---------------------------------------------------|---------|---------------------|-------------------------------------------------------------------------------------------------------------------|
| Kampa Dome<br>Kangmar Dome                        | 395     | °C                  |                                                                                                                   |
| <b>Temperature at sea level</b>                   | 20      | °C                  | <a href="#">Thiede et al., 2017</a>                                                                               |
| <b>Atmospheric Lapse Rate</b>                     | 6       | °C/km               | <a href="#">Adlakha et al., 2013</a><br><a href="#">Naito et al., 2006</a><br><a href="#">Thiede et al., 2017</a> |
| <b>Crustal heat production</b>                    |         |                     |                                                                                                                   |
| Gianbul Dome                                      | 7.75    | °C Ma <sup>-1</sup> | <a href="#">Adlakha et al., 2013</a>                                                                              |
| Suru Dome                                         | 3.5     | °C Ma <sup>-1</sup> |                                                                                                                   |
| Chisoti Dome                                      | 7.5     | °C Ma <sup>-1</sup> |                                                                                                                   |
| Changgo -Malashan Dome                            | 2.7     | °C Ma <sup>-1</sup> |                                                                                                                   |
| Mabja Dome                                        | 3.5     | °C Ma <sup>-1</sup> |                                                                                                                   |
| Kampa Dome                                        | 4.5     | °C Ma <sup>-1</sup> |                                                                                                                   |
| Kangmar Dome                                      | 2.5     | °C Ma <sup>-1</sup> |                                                                                                                   |
| <b>Space in degrees of longitude and latitude</b> | 0.00027 | °                   | SRTM 30 DEM                                                                                                       |

**Table. S4 Thermal and Mechanical Parameter Values Specific for Pecube Inverse Modeling.**

| Domes Name   | Parameters              |                                 | Parameters Range for inverse modeling | No. of forward models run for taken parameters | Best fit after inverse modeling | NA Misfit |
|--------------|-------------------------|---------------------------------|---------------------------------------|------------------------------------------------|---------------------------------|-----------|
| Gianbul Dome | Basal Temperature (°C)  |                                 | 500:1000                              | 5794                                           | 749.799                         | 2.03      |
|              | Heat production (°C/Ma) |                                 | 7:10                                  | 5794                                           | 8.918                           | 2.03      |
|              | CNF                     | 1st activation start time (Ma)  | 18:26                                 | 17529                                          | 21.644                          | 0.320     |
|              |                         | 1st activation end Time (Ma)    | 13:23                                 | 17529                                          | 19.065                          | 0.320     |
|              |                         | 2nd activation start time (Ma)  | 2:8                                   | 23630                                          | 3.9603                          | 0.41846   |
|              |                         | 2nd activation end time (Ma)    | 1:7                                   | 23630                                          | 3.8786                          | 0.41846   |
|              | STDS                    | 1st activation start time (Ma)  | 20.5:22                               | 9458                                           | 21.707                          | 0.308     |
|              |                         | 1st activation end Time (Ma)    | 19:20.5                               | 9458                                           | 19.00                           | 0.308     |
|              |                         | 2nd activation start time (Ma)  | 6:7                                   | 9458                                           | 6.792                           | 0.308     |
|              |                         | 2nd activation end time (Ma)    | 5:6                                   | 9458                                           | 5.66                            | 0.308     |
|              | MCT                     | 1st activation start time (Ma)  | 18:26                                 | 34880                                          | 22.6556                         | 0.41569   |
|              |                         | 1st activation end Time (Ma)    | 13:23                                 | 34880                                          | 21.4818                         | 0.41569   |
|              |                         | 2nd Segment Depth from MSL (km) | -5:-9                                 | 12059                                          | -5.17                           | 1.08      |
|              |                         | 3rd Segment Depth from MSL (km) | -8:-15                                | 12059                                          | -14.86                          | 1.08      |
|              |                         | 4th Segment Depth from MSL (km) | -15:-20                               | 12059                                          | -19.99                          | 1.08      |
|              |                         | 5th Segment Depth from MSL (km) | -17:-21                               | 12665                                          | -19.24                          | 1.10      |
|              |                         | 6th Segment Depth from MSL (km) | -17:-22                               | 12665                                          | -21.97                          | 1.10      |
|              |                         | 7th Segment Depth from MSL (km) | -22:-26                               | 12665                                          | -25.98                          | 1.10      |

|              |                         |                                 |          |       |          |         |
|--------------|-------------------------|---------------------------------|----------|-------|----------|---------|
|              | MHT                     | Overthrusting velocity (cm/yr)  | 0:-7     | 48268 | -4.5795  | 0.42703 |
|              |                         | Underthrusting velocity (cm/yr) | -1:-17   | 48268 | -13.4341 | 0.42703 |
| Suru Dome    | Basal Temperature (°C)  |                                 | 500:1000 | 3144  | 500.11   | 0.22609 |
|              | Heat production (°C/Ma) |                                 | 3:10     | 3144  | 4.263    | 0.22609 |
|              | STDS                    | 1st activation start time (Ma)  | 20.5:23  | 11163 | 20.95    | 0.24827 |
|              |                         | 1st activation end Time (Ma)    | 19:20.5  | 11163 | 19.82    | 0.24827 |
|              |                         | 2nd activation start time (Ma)  | 6:8      | 23316 | 7.04     | 0.34815 |
|              |                         | 2nd activation end time (Ma)    | 3:5      | 23316 | 3.40     | 0.34815 |
|              | MCT                     | 1st activation start time (Ma)  | 20.5:23  | 23316 | 21.95    | 0.34815 |
|              |                         | 1st activation end Time (Ma)    | 19:20.5  | 23316 | 19.71    | 0.34815 |
|              | MHT                     | Overthrusting velocity (cm/yr)  | -4:-6    | 11163 | -4.38    | 0.24827 |
|              |                         | Unerthrusting velocity (cm/yr)  | -14:-17  | 11163 | -15.400  | 0.24827 |
| Chisoti Dome | Basal Temperature (°C)  |                                 | 500:1000 | 10247 | 723.88   | 0.864   |
|              | Heat production (°C/Ma) |                                 | 3:10     | 16696 | 3.00     | 0.971   |
|              | CNF                     | 1st activation start time (Ma)  | 19.5:22  | 18433 | 19.82    | 1.275   |
|              |                         | 1st activation end Time (Ma)    | 18:19.5  | 18433 | 18.03    | 1.275   |
|              |                         | 2nd activation start time (Ma)  | 5:8      | 18433 | 6.14     | 1.275   |
|              |                         | 2nd activation end time (Ma)    | 3:5.5    | 18433 | 3.909    | 1.275   |
|              | STDS                    | 1st activation start time (Ma)  | 20:22    | 10247 | 20.97    | 0.864   |
|              |                         | 1st activation end Time (Ma)    | 18:20    | 10247 | 19.27    | 0.864   |

|                       |                         |                                 |          |       |          |         |
|-----------------------|-------------------------|---------------------------------|----------|-------|----------|---------|
|                       |                         | 2nd activation start time (Ma)  | 6:8      | 10247 | 7.99     | 0.864   |
|                       |                         | 2nd activation end time (Ma)    | 4:6      | 10247 | 4.54     | 0.864   |
|                       | MCT                     | 1st activation start time (Ma)  | 21:22    | 18097 | 21.01    | 2.26    |
|                       |                         | 1st activation end Time (Ma)    | 19:20    | 18097 | 19.22    | 2.26    |
|                       | MHT                     | Overthrusting velocity (cm/yr)  | -2:-5    | 4154  | -2.45    | 1.18    |
|                       |                         | Underthrusting velocity (cm/yr) | -14:-16  | 4154  | -15.745  | 1.18    |
| Changgo-Malashan Dome | Basal Temperature (°C)  |                                 | 300:1000 | 3674  | 688.135  | 0.14732 |
|                       | Heat production (°C/Ma) |                                 | 0:10     | 3647  | 4.39     | 0.14732 |
|                       | STDS                    | 2nd activation start time (Ma)  | 17:21    | 5660  | 18.911   | 0.30757 |
|                       |                         | 2nd activation end time (Ma)    | 14:18    | 5660  | 17.518   | 0.30757 |
|                       |                         | 2nd activation start time (Ma)  | 4:8      | 23769 | 4.2659   | 0.63259 |
|                       |                         | 2nd activation end time (Ma)    | 3:7      | 23769 | 4.2283   | 0.63259 |
|                       | MHT                     | Overthrusting velocity (cm/yr)  | -3:-6    | 3674  | -4.064   | 0.14732 |
|                       |                         | Underthrusting velocity (cm/yr) | -13:-16  | 3647  | -14.364  | 0.14732 |
| Mabja Dome            | Basal Temperature (°C)  |                                 | 0:2000   | 7671  | 852.0915 | 0.68197 |
|                       | Heat production (°C/Ma) |                                 | 0:10     | 6220  | 7.489    | 0.57871 |
|                       | STDS                    | 1st activation start time (Ma)  | 13:18    | 8630  | 14.35    | 1.3127  |
|                       |                         | 1st activation end Time (Ma)    | 11:15    | 8630  | 12.094   | 1.3127  |
|                       |                         | 2nd activation start time (Ma)  | 8:12     | 8630  | 10.80    | 1.3127  |
|                       |                         | 2nd activation end time (Ma)    | 7:10     | 8630  | 9.54     | 1.3127  |
|                       |                         | 3rd activation start time (Ma)  | 4:8      | 6432  | 4.727    | 1.314   |
|                       |                         |                                 |          |       |          |         |

|              |                         |                                 |         |       |         |         |
|--------------|-------------------------|---------------------------------|---------|-------|---------|---------|
|              |                         | 3rd activation end time (Ma)    | 3:7     | 6432  | 4.722   | 1.314   |
|              | MHT                     | Overthrusting velocity (cm/yr)  | -1:-6   | 6220  | -1.827  | 0.57871 |
|              |                         | Underthrusting velocity (cm/yr) | -13:-16 | 6220  | -15.337 | 0.57871 |
| Kampa Dome   | Basal Temperature (°C)  |                                 | 100:600 | 16115 | 591.861 | 1.3702  |
|              | Heat production (°C/Ma) |                                 | 0:10    | 16115 | 4.470   | 1.3702  |
|              | STDS                    | 1st activation start time (Ma)  | 14:17   | 39738 | 14.81   | 2.5166  |
|              |                         | 1st activation end Time (Ma)    | 12:15   | 39738 | 14.80   | 2.5166  |
|              |                         | 2nd activation start time (Ma)  | 5:9     | 11635 | 5.77    | 2.8414  |
|              |                         | 2nd activation end time (Ma)    | 3:7     | 11635 | 5.76    | 2.8414  |
|              | MHT                     | Overthrusting Velocity (cm/yr)  | -3:-6   | 16115 | -4.04   | 1.3702  |
|              |                         | Underthrusting Velocity (cm/yr) | -14:-16 | 16115 | -15.73  | 1.3702  |
| Kangmar Dome | Basal Temperature (°C)  |                                 | 250:500 | 4883  | 395.527 | 0.59809 |
|              | Heat production (°C/Ma) |                                 | 0.5:10  | 4883  | 1.635   | 0.59809 |
|              | STDS                    | 1st activation start time (Ma)  | 11:14   | 12436 | 12.343  | 0.77334 |
|              |                         | 1st activation end Time (Ma)    | 9:13    | 12436 | 12.35   | 0.77334 |
|              |                         | 2nd activation start time (Ma)  | 4:8     | 16564 | 4.96    | 0.83006 |
|              |                         | 2nd activation end time (Ma)    | 3:6     | 16564 | 4.93    | 0.83006 |
|              | MHT                     | Overthrusting velocity (cm/yr)  | -3:-5   | 4883  | -3.343  | 0.59809 |
|              |                         | Underthrusting velocity         | -14:-15 | 4883  | -14.026 | 0.59809 |

## References

- Acton, C. E., Priestley, K., Mitra, S., & Gaur, V. K. (2011). Crustal structure of the Darjeeling-Sikkim Himalaya and southern Tibet. *Geophysical Journal International*, 184(2). <https://doi.org/10.1111/j.1365-246X.2010.04868.x>
- Adlakha, V., Lang, K. A., Patel, R. C., Lal, N., & Huntington, K. W. (2013). Rapid long-term erosion in the rain shadow of the Shillong Plateau, Eastern Himalaya. *Tectonophysics*, 582, 76-508 83
- Aoya, M., Wallis, S. R., Kawakami, T., Lee, J., Wang, Y., & Maeda, H. (2006). The Malashan gneiss dome in south Tibet: Comparative study with the Kangmar dome with special reference to kinematics of deformation and origin of associated granites.
- Aoya, M., Wallis, S. R., Terada, K., Lee, J., Kawakami, T., Wang, Y., & Heizler, M. (2005). North-south extension in the Tibetan crust triggered by granite emplacement. *Geology*, 33(11), 853-856.
- Avouac, J. P. (2003). Mountain building, erosion, and the seismic cycle in the Nepal Himalaya. *Advances in geophysics*, 46, 1-80.
- Braun, J. (2003). Pecube: A new finite-element code to solve the 3D heat transport equation including the effects of a time-varying, finite amplitude surface topography. *Computers and Geosciences*, 29(6), 787–794. [https://doi.org/10.1016/S0098-3004\(03\)00052-9](https://doi.org/10.1016/S0098-3004(03)00052-9)
- Braun, J., & Robert, X. (2005). Constraints on the rate of post-orogenic erosional decay from low-temperature thermochronological data: Application to the Dabie Shan, China. *Earth Surface Processes and Landforms: The Journal of the British Geomorphological Research Group*, 30(9), 1203-1225.

- Braun, J., van der Beek, P., Valla, P., Robert, X., Herman, F., Glotzbach, C., Pedersen, V., Perry, C., Simon-Labric, T., & Prigent, C. (2012). Quantifying rates of landscape evolution and tectonic processes by thermochronology and numerical modeling of crustal heat transport using PECUBE. In *Tectonophysics* (Vols. 524–525, pp. 1–28). <https://doi.org/10.1016/j.tecto.2011.12.035>
- Clubb, F. J., Mudd, S. M., Schildgen, T. F., van der Beek, P. A., Devrani, R., & Sinclair, H. D. (2023). Himalayan valley-floor widths controlled by tectonically driven exhumation. *Nature Geoscience*, 16(8), 739–746.
- Coutand, I., Whipp, D. M., Grujic, D., Bernet, M., Fellin, M. G., Bookhagen, B., Landry, K. R., Ghalley, S. K., & Duncan, C. (2014). Geometry and kinematics of the Main Himalayan Thrust and Neogene crustal exhumation in the Bhutanese Himalaya derived from inversion of multithermochronologic data. *Journal of Geophysical Research: Solid Earth*, 119(2). <https://doi.org/10.1002/2013JB010891>
- DeCelles, P. G., Gehrels, G. E., Najman, Y., Martin, A. J., Carter, A., & Garzanti, E. (2004). Detrital geochronology and geochemistry of Cretaceous–Early Miocene strata of Nepal: implications for timing and diachroneity of initial Himalayan orogenesis. *Earth and Planetary Science Letters*, 227(3–4), 313–330.
- Deeken, A., Thiede, R. C., Sobel, E. R., Hourigan, J. K., & Strecker, M. R. (2011). Exhumational variability within the Himalaya of northwest India. *Earth and Planetary Science Letters*, 305(1–2), 103–114. <https://doi.org/10.1016/j.epsl.2011.02.045>

- Dèzes, P. (1999). *Tectonic and metamorphic evolution of the central Himalayan domain in south-east Zaskar (Kashmir, India)* (Doctoral dissertation, Université de Lausanne, Faculté des sciences).
- Ge, Y., Liu-Zeng, J., Zhang, J., Wang, W., Tian, Y., Fox, M., ... & Xie, K. (2020). Spatio-temporal variation in rock exhumation linked to large-scale shear zones in the southeastern Tibetan Plateau. *Science China Earth Sciences*, 63(4), 512-532.
- Grujic, D., Warren, C. J., & Wooden, J. L. (2011). Rapid synconvergent exhumation of Miocene-aged lower orogenic crust in the eastern Himalaya. *Lithosphere*, 3(5). <https://doi.org/10.1130/L154.1>
- Hack, J. T. (1957). *Studies of longitudinal stream profiles in Virginia and Maryland* (Vol. 294). US Government Printing Office.
- Hazarika, D., Wadhawan, M., Paul, A., Kumar, N., & Borah, K. (2017). Geometry of the Main Himalayan Thrust and Moho beneath Satluj valley, northwest Himalaya: Constraints from receiver function analysis. *Journal of Geophysical Research: Solid Earth*, 122(4). <https://doi.org/10.1002/2016JB013783>.
- Herman, F., Copeland, P., Avouac, J. P., Bollinger, L., Mahéo, G., Le Fort, P., Rai, S., Foster, D., Pêcher, A., Stüwe, K. & Henry, P. (2010). Exhumation, crustal deformation, and thermal structure of the Nepal Himalaya derived from the inversion of thermochronological and thermobarometric data and modeling of the topography. *Journal of Geophysical Research: Solid Earth*, 115(B6)
- Hofmann-Wellenhof, B., & Moritz, H. (2006). *Physical Geodesy* (2nd, corr. ed. 2006 edition ed.). Wien ; New York: Springer.

- Horton, F., Lee, J., Hacker, B., Bowman-Kamaha'o, M., & Cosca, M. (2015). Himalayan gneiss dome formation in the middle crust and exhumation by normal faulting: New geochronology of Gianbul dome, northwestern India. *Bulletin*, 127(1-2), 162-180.
- Kirby, E., & Whipple, K. X. (2012). Expression of active tectonics in erosional landscapes. *Journal of Structural Geology*, 44, 54–75. <https://doi.org/10.1016/j.jsg.2012.07.009>.
- Kumar, A., Lal, N., Jain, A. K., & Sorkhabi, R. B. (1995). Late cenozoic-quaternary thermo-tectonic history of Wigher Himalayan Crystalline (HHC) in Kishtwar-Padar-Zaskar region, NW Himalaya: Evidence from fission track ages. *Journal Geological Society of India*, 45(4), 375-391.
- Larson, K. P., Godin, L., Davis, W. J., & Davis, D. W. (2010). Out-of-sequence deformation and expansion of the Himalayan orogenic wedge: Insight from the Changgo culmination, south central Tibet. *Tectonics*, 29(4).
- Lee, J., Hacker, B. R., Dinklage, W. S., Wang, Y., Gans, P., Calvert, A., ... & McClelland, W. (2000). Evolution of the Kangmar Dome, southern Tibet: Structural, petrologic, and thermochronologic constraints. *Tectonics*, 19(5), 872-895.
- Lee, J., McClelland, W., Wang, Y., Blythe, A., & McWilliams, M. (2006). Oligocene–Miocene middle crustal flow in southern Tibet: Geochronology of Mabja Dome.
- Ma, Z., Han, Z., Li, Y., Xu, T., Han, X., Bi, W., & Zhang, W. (2023). Late Cenozoic cooling and evolution history of the Kangmar dome in southern Tibet: Insights from inverse thermal modeling. *Frontiers in Earth Science*, 11, 1186901.

- Mitra, S., Priestley, K., Bhattacharyya, A. K., & Gaur, V. K. (2005). Crustal structure and earthquake focal depths beneath northeastern India and southern Tibet. *Geophysical Journal International*, 160(1). <https://doi.org/10.1111/j.1365-246X.2004.02470.x>
- Mudd, S. M., Clubb, F. J., Gailleton, B., & Hurst, M. D. (2018). How concave are river channels? *Earth Surface Dynamics*, 6(2), 505–523. <https://doi.org/10.5194/esurf-6-505-2018>.
- Mudd, Simon M., et al. "A statistical framework to quantify spatial variation in channel gradients using the integral method of channel profile analysis." *Journal of Geophysical Research: Earth Surface* 119.2 (2014): 138-152.
- Naito, N., Ageta, Y., Iwata, S., Matsuda, Y., Suzuki, R., & Yabuki, H. (2006). Glacier shrinkages and climate conditions around Jichu Dromo Glacier in the Bhutan Himalayas from 1998 to 2003. *Bulletin of glaciological research*, 23, 51-61.
- NASA Shuttle Radar Topography Mission (SRTM)(2013). Shuttle Radar Topography Mission (SRTM) Global. Distributed by OpenTopography. <https://doi.org/10.5069/G9445JDF>.
- Oliveira Jr, V. C., Uieda, L., Hallam, K. A., & CF, V. (2018). Should geophysicists use the gravity disturbance or the anomaly?. *Geophysics*.
- Pérez-Peña, J. V., Al-Awabdeh, M. O. H. A. M. M. A. D., Azañón, J. M., Galve, J. P., Booth-Rea, G., & Notti, D. (2017). SwathProfiler and NProfiler: Two new ArcGIS Add-ins for the automatic extraction of swath and normalized river profiles. *Computers & Geosciences*, 104, 135-150.
- Quigley, M., Liangjun, Y., Xiaohan, L., Wilson, C. J., Sandiford, M., & Phillips, D. (2006). <sup>40</sup>Ar/<sup>39</sup>Ar thermochronology of the Kampa Dome, southern Tibet: Implications for tectonic evolution of the North Himalayan gneiss domes. *Tectonophysics*, 421(3-4), 269-297.

- Sambridge, M. (1999a). Geophysical inversion with a neighbourhood algorithm - I. Searching a parameter space. *Geophysical Journal International*, 138(2). <https://doi.org/10.1046/j.1365-246X.1999.00876.x>.
- Sambridge, M. (1999b). Geophysical inversion with a neighbourhood algorithm--II. Appraising the ensemble. *Geophysical Journal International*, 138(3). <https://doi.org/10.1046/j.1365-246X.1999.00900.x>.
- Shen, T., Wang, G., Leloup, P. H., van Der Beek, P., Bernet, M., Cao, K., ... & Zhang, K. (2016). Controls on Cenozoic exhumation of the Tethyan Himalaya from fission-track thermochronology and detrital zircon U-Pb geochronology in the Gyirong basin area, southern Tibet. *Tectonics*, 35(7), 1713-1734.
- Sorkhabi, R. B., Jain, A. K., Itaya, T., Fukui, S., Lal, N., & Kumar, A. (1997). Cooling age record of domal uplift in the core of the Higher Himalayan Crystallines (HHC), southwest Zaskar, India. *Journal of Earth System Science*, 106(3), 169-179.
- Thiede, R., Robert, X., Stübner, K., Dey, S., & Faruhn, J. (2017). Sustained out-of-sequence shortening along a tectonically active segment of the Main Boundary thrust: The Dhauladhar Range in the northwestern Himalaya. *Lithosphere*, 9(5), 715-725.
- Valla, P. G., Herman, F., van Der Beek, P. A., & Braun, J. (2010). Inversion of thermochronological age-elevation profiles to extract independent estimates of denudation and relief history—I: Theory and conceptual model. *Earth and Planetary Science Letters*, 295(3-4), 511-522.
- Warren, C. J., Grujic, D., Kellett, D. A., Cottle, J., Jamieson, R. A., & Ghalley, K. S. (2011). Probing the depths of the India-Asia collision: U-Th-Pb monazite chronology of granulites from NW Bhutan. *Tectonics*, 30(2). <https://doi.org/10.1029/2010TC002738>.

Yadav, D. K., Hazarika, D., & Kumar, N. (2016). Seismicity and stress inversion study in the Kangra–Chamba region of north-west Himalaya. *Natural Hazards*, 82(2), 1393–1409.

<https://doi.org/10.1007/s11069-016-2251-y>.

Zhao, W., Nelson, K. D., Che, J., Quo, J., Lu, D., Wu, C., & Liu, X. (1993). Deep seismic reflection evidence for continental underthrusting beneath southern Tibet. *Nature*, 366(6455).

<https://doi.org/10.1038/366557a0>.
